# Supplementary material
Source: publisher figshare collection journal article supplement (https://acs.figshare.com/ndownloader/files/11224499)
Supplement: Supplementary file 1 [file 11224499]

134
CAT1  Rh2C56N4H56O16 
Rh  -0.02864   0.02343   0.31515
Rh   0.00935   0.06871  -2.07943
N   -3.03570  -3.65051   0.01413
O   -4.01587  -1.61785  -0.57881
O   -2.44272  -5.55078   1.23592
C   -3.95153  -2.59031   0.15442
C   -4.77387  -2.90768   1.35575
C   -5.82146  -2.19985   1.93416
H   -6.16096  -1.25424   1.51852
C   -6.40672  -2.75052   3.08631
H   -7.22904  -2.22925   3.57093
C   -5.94507  -3.96072   3.62827
H   -6.41920  -4.35926   4.52229
C   -4.87755  -4.65906   3.04014
H   -4.50824  -5.59099   3.46106
C   -4.30680  -4.10737   1.89898
C   -3.15955  -4.57867   1.06860
N    3.90164  -2.67549   0.27393
O    2.03453  -4.01800  -0.14933
O    5.68695  -1.65399   1.38185
C    2.98823  -3.71514   0.54586
C    3.43265  -4.32632   1.83259
C    2.90870  -5.40085   2.54185
H    2.04033  -5.94520   2.17885
C    3.54297  -5.74908   3.74554
H    3.16342  -6.58373   4.33041
C    4.65897  -5.03476   4.20993
H    5.12704  -5.32797   5.14681
C    5.17617  -3.94796   3.48629
H    6.03702  -3.38746   3.84239
C    4.54157  -3.61405   2.29522
C    4.83217  -2.52345   1.31965
N    3.06487   3.62471   0.24080
O    3.99474   1.58560  -0.40934
O    2.50430   5.49540   1.52195
C    3.94176   2.52969   0.36101
C    4.74199   2.77129   1.59457
C    5.74991   2.00604   2.17051
H    6.07003   1.06676   1.72608
C    6.32182   2.49038   3.35858
H    7.11302   1.92248   3.84256
C    5.88605   3.69329   3.93699
H    6.34882   4.03976   4.85823
C    4.85850   4.45036   3.35038
H    4.50895   5.37704   3.79888
C    4.30060   3.96382   2.17377
C    3.19216   4.50638   1.33441
N   -4.05669   2.60719   0.25988
O   -2.26246   4.07864  -0.02584
O   -5.82665   1.43834   1.23975
C   -3.22121   3.68601   0.61514
C   -3.75262   4.20913   1.90791
C   -3.32412   5.27871   2.68552
H   -2.47711   5.89010   2.38403
C   -4.02591   5.53248   3.87524
H   -3.72170   6.36002   4.51195
C   -5.11412   4.73278   4.25955
H   -5.63631   4.95398   5.18755
C   -5.53517   3.65261   3.46698
H   -6.37438   3.02679   3.76040
C   -4.83407   3.41241   2.29067
C   -5.02024   2.35465   1.25526
O   -1.02572  -1.78934   0.19694
O   -0.86070  -1.81821  -2.06375
O    1.79478  -0.95781   0.25844
O    1.89512  -0.79870  -2.00075
O    0.98227   1.83291   0.29925
O    0.88975   1.94887  -1.96265
O   -1.85784   0.99844   0.24208
O   -1.88420   0.92164  -2.02339
C   -1.22937  -2.30460  -0.94911
C   -1.92843  -3.67713  -0.94838
H   -1.18833  -4.35289  -0.50125
C   -2.28494  -4.24076  -2.34690
C   -2.57500  -5.75512  -2.24526
H   -3.49842  -5.91419  -1.67264
H   -1.77404  -6.23177  -1.66701
C   -3.40939  -3.47741  -3.06548
H   -3.21996  -2.40255  -3.08029
H   -4.37916  -3.64489  -2.58312
H   -3.49428  -3.81774  -4.10211
C    2.36434  -1.13137  -0.86661
C    3.78664  -1.71173  -0.82444
H    4.39257  -0.85457  -0.50637
C    4.35184  -2.18726  -2.18676
C    3.63968  -3.41364  -2.77949
H    3.86034  -4.32306  -2.21006
H    3.96956  -3.58001  -3.80980
H    2.55586  -3.28102  -2.79415
C    5.87982  -2.38883  -2.07794
H    6.09095  -3.24238  -1.41968
H    6.31896  -1.51084  -1.58862
C    1.23851   2.38212  -0.82009
C    1.98404   3.72859  -0.74655
H    1.25820   4.41347  -0.29006
C    2.39543   4.33312  -2.11247
C    2.73360   5.83157  -1.94463
H    1.93478   6.31328  -1.36757
H    3.64696   5.93670  -1.34415
C    3.51165   3.55912  -2.83224
H    3.28637   2.49297  -2.89425
H    4.47353   3.67406  -2.31967
H    3.63524   3.93604  -3.85220
C   -2.39984   1.19382  -0.89287
C   -3.84747   1.70897  -0.87878
H   -4.42221   0.80869  -0.62809
C   -4.38800   2.22054  -2.23870
C   -5.91785   2.37685  -2.16313
H   -6.20400   3.19372  -1.48993
H   -6.39748   1.46155  -1.80075
H   -6.33495   2.60149  -3.14911
C   -3.69610   3.49138  -2.77437
H   -2.61500   3.39611  -2.64382
H   -4.00227   4.35802  -2.17520
H    4.17766  -1.33960  -2.86046
H    1.48832   4.26533  -2.72581
H   -4.16826   1.40448  -2.93754
H   -1.36586  -4.11859  -2.93331
C    6.58390  -2.60507  -3.42549
H    7.67009  -2.64966  -3.28754
H    6.27796  -3.53856  -3.90862
H    6.37169  -1.78321  -4.12018
C   -2.69246  -6.46565  -3.60154
H   -1.79664  -6.30343  -4.21337
H   -2.80449  -7.54631  -3.45891
H   -3.55749  -6.12144  -4.17746
C   -3.98964   3.76928  -4.25674
H   -3.42930   4.64613  -4.60044
H   -3.69158   2.92005  -4.88367
H   -5.05033   3.96754  -4.44484
C    2.90936   6.58915  -3.26880
H    3.77643   6.23724  -3.83694
H    2.02429   6.48208  -3.90782
H    3.05449   7.65892  -3.08114
134
CAT2  Rh2C56N4H40O16Cl16
Rh   0.00000   0.00000  -0.95786
Rh   0.00001  -0.00001  -3.35079
N    4.26750   2.05940  -1.02932
O    4.37211  -0.22686  -1.44725
O    4.43392   4.13242   0.01591
C    4.65065   0.73778  -0.76092
C    5.44404   0.79099   0.51205
C    6.07639  -0.22348   1.22159
C    6.77144   0.13268   2.40217
C    6.80992   1.47421   2.83858
C    6.14996   2.48855   2.10569
C    5.47547   2.11842   0.94859
C    4.68617   2.94414  -0.02210
N   -2.05940   4.26750  -1.02936
O    0.22686   4.37210  -1.44729
O   -4.13241   4.43393   0.01587
C   -0.73777   4.65065  -0.76097
C   -0.79098   5.44405   0.51200
C    0.22349   6.07640   1.22153
C   -0.13267   6.77146   2.40210
C   -1.47420   6.80994   2.83852
C   -2.48854   6.14998   2.10564
C   -2.11841   5.47549   0.94854
C   -2.94413   4.68618  -0.02214
N   -4.26748  -2.05939  -1.02930
O   -4.37199   0.22689  -1.44715
O   -4.43395  -4.13244   0.01587
C   -4.65057  -0.73776  -0.76085
C   -5.44393  -0.79098   0.51213
C   -6.07623   0.22349   1.22171
C   -6.77127  -0.13268   2.40230
C   -6.80979  -1.47422   2.83867
C   -6.14989  -2.48856   2.10574
C   -5.47541  -2.11842   0.94863
C   -4.68616  -2.94415  -0.02209
N    2.05936  -4.26752  -1.02932
O   -0.22689  -4.37211  -1.44734
O    4.13234  -4.43397   0.01598
C    0.73772  -4.65067  -0.76098
C    0.79088  -5.44408   0.51198
C   -0.22361  -6.07643   1.22147
C    0.13249  -6.77150   2.40205
C    1.47401  -6.81000   2.83851
C    2.48838  -6.15003   2.10567
C    2.11829  -5.47553   0.94857
C    2.94406  -4.68622  -0.02207
O    1.68790   1.21300  -1.02697
O    1.68482   1.20399  -3.28914
O   -1.21300   1.68790  -1.02698
O   -1.20399   1.68479  -3.28916
O   -1.68790  -1.21299  -1.02697
O   -1.68479  -1.20401  -3.28914
O    1.21300  -1.68790  -1.02695
O    1.20402  -1.68481  -3.28913
C    2.16430   1.53911  -2.16207
C    3.38761   2.48184  -2.12921
H    2.97074   3.43714  -1.78627
C    4.13429   2.77619  -3.47782
C    5.34486   3.68855  -3.17288
H    6.10407   3.17971  -2.56940
H    5.04739   4.60180  -2.64738
C    4.64062   1.50491  -4.18892
H    3.82289   0.82789  -4.44412
H    5.35827   0.95259  -3.57545
H    5.14974   1.79037  -5.11688
C   -1.53911   2.16428  -2.16209
C   -2.48184   3.38760  -2.12924
H   -3.43713   2.97073  -1.78630
C   -2.77619   4.13426  -3.47786
C   -1.50491   4.64057  -4.18898
H   -0.95258   5.35823  -3.57552
H   -1.79037   5.14968  -5.11694
H   -0.82790   3.82284  -4.44417
C   -3.68854   5.34485  -3.17293
H   -3.17968   6.10406  -2.56945
H   -4.60178   5.04738  -2.64742
C   -2.16428  -1.53912  -2.16207
C   -3.38761  -2.48183  -2.12921
H   -2.97075  -3.43714  -1.78629
C   -4.13431  -2.77614  -3.47781
C   -5.34489  -3.68850  -3.17286
H   -5.04741  -4.60176  -2.64739
H   -6.10408  -3.17966  -2.56936
C   -4.64065  -1.50485  -4.18888
H   -3.82291  -0.82783  -4.44408
H   -5.35828  -0.95253  -3.57539
H   -5.14978  -1.79028  -5.11683
C    1.53912  -2.16430  -2.16205
C    2.48184  -3.38761  -2.12918
H    3.43713  -2.97075  -1.78620
C    2.77623  -4.13427  -3.47779
C    3.68858  -5.34486  -3.17284
H    3.17970  -6.10407  -2.56939
H    4.60180  -5.04740  -2.64731
H    3.98179  -5.82239  -4.11389
C    1.50497  -4.64058  -4.18895
H    0.82797  -3.82284  -4.44416
H    0.95263  -5.35823  -3.57551
H    5.82241   3.98174  -4.11393
H   -3.98173   5.82239  -4.11398
H   -5.82246  -3.98167  -4.11391
H    1.79046  -5.14968  -5.11691
Cl   6.18853   4.13869   2.63771
Cl   7.67030   1.88670   4.28774
Cl   7.58157  -1.09663   3.31989
Cl   5.99796  -1.87020   0.69529
Cl   4.13850  -6.18863   2.63775
Cl   1.88644  -7.67042   4.28767
Cl  -1.09686  -7.58164   3.31972
Cl  -1.87032  -5.99799   0.69512
Cl  -6.18852  -4.13872   2.63770
Cl  -7.67018  -1.88672   4.28783
Cl  -7.58133   1.09664   3.32008
Cl  -5.99774   1.87023   0.69547
Cl  -4.13868   6.18856   2.63765
Cl  -1.88669   7.67034   4.28767
Cl   1.09664   7.58159   3.31982
Cl   1.87021   5.99797   0.69523
C    3.56076  -3.18188  -4.41019
H    2.96260  -2.32252  -4.71637
H    4.47196  -2.81142  -3.92557
H    3.86379  -3.72527  -5.31208
C    3.18191   3.56068  -4.41026
H    2.81143   4.47189  -3.92568
H    3.72531   3.86367  -5.31215
H    2.32256   2.96250  -4.71644
C   -3.56069   3.18188  -4.41028
H   -3.86369   3.72528  -5.31218
H   -2.96252   2.32252  -4.71646
H   -4.47191   2.81141  -3.92569
C   -3.18196  -3.56062  -4.41028
H   -3.72538  -3.86359  -5.31217
H   -2.32261  -2.96245  -4.71646
H   -2.81148  -4.47185  -3.92573
30
CAT3  Rh2C8O8F12
Rh   0.03127   0.00609   0.32186
Rh  -0.00784  -0.06343  -2.09245
O    0.95645   1.86072   0.17983
O    0.92197   1.79464  -2.09516
O   -1.82763   0.93215   0.26000
O   -1.86320   0.86772  -2.01499
O   -0.89856  -1.85169   0.32275
O   -0.93317  -1.91815  -1.95217
O    1.88660  -0.92514   0.24467
O    1.85124  -0.98945  -2.03036
C    1.18648   2.31693  -0.97630
C   -2.33465   1.14810  -0.87609
C   -1.16583  -2.37296  -0.79642
C    2.35804  -1.20549  -0.89402
C   -3.71228   1.86955  -0.90051
F   -3.56602   3.09218  -1.44896
F   -4.58713   1.17164  -1.64571
F   -4.21575   2.01201   0.33075
C   -1.91963  -3.73254  -0.75198
F   -3.24562  -3.49760  -0.85044
F   -1.55093  -4.51964  -1.77303
F   -1.68718  -4.38069   0.39677
C    3.73501  -1.92826  -0.87003
F    4.60732  -1.23892  -0.11426
F    3.58461  -3.15614  -0.33428
F    4.24396  -2.05952  -2.10040
C    1.90332   3.69699  -1.00127
F    1.21750   4.58630  -0.26122
F    3.13841   3.56966  -0.47751
F    2.01514   4.17184  -2.24697
30
CAT4 Rh2C8O8H12
Rh  -1.17656  -0.01410   0.10040
Rh  -3.51633  -0.32912  -0.30561
O   -1.21292   1.54476  -1.27277
O   -3.42923   1.24589  -1.65800
O   -1.68301   1.31231   1.61741
O   -3.89948   1.01446   1.23223
O   -1.26354  -1.58964   1.45220
O   -3.48018  -1.88753   1.06811
O   -0.79335  -1.35719  -1.43786
O   -3.00982  -1.65621  -1.82205
C   -2.31582   1.84287  -1.84277
C   -2.91672   1.53264   1.86145
C   -2.37699  -2.18633   1.63730
C   -1.77608  -1.87628  -2.06630
C   -3.24111   2.46290   3.00747
H   -4.19525   2.96361   2.83294
H   -3.32733   1.86926   3.92432
H   -2.44026   3.19172   3.14495
C   -2.38432  -3.36115   2.58794
H   -3.36535  -3.46665   3.05489
H   -2.17623  -4.27274   2.01682
H   -1.60566  -3.24458   3.34391
C   -2.30843   3.01716  -2.79408
H   -3.08662   2.89977  -3.55042
H   -2.51728   3.92899  -2.22363
H   -1.32719   3.12280  -3.26055
C   -1.45219  -2.80718  -3.21196
H   -2.24648  -3.54513  -3.33893
H   -1.38222  -2.21626  -4.13195
H   -0.49111  -3.29691  -3.04492
134
CAT1-b(Hashimoto��s model) Rh2C56N4H56O16 
Rh  -0.43949  -0.50521   1.07056
Rh   0.49049  -0.52982  -1.13659
N    3.73941   2.75679   0.11026
O    1.90767   3.88248  -0.81740
O    5.88977   1.88620   0.39531
C    3.08754   3.58979  -0.82656
C    4.13918   4.01603  -1.79759
C    4.04976   4.85275  -2.90408
H    3.10643   5.31506  -3.18423
C    5.22367   5.07379  -3.64234
H    5.19551   5.72181  -4.51534
C    6.43660   4.47039  -3.27265
H    7.32867   4.66072  -3.86493
C    6.51364   3.62656  -2.15305
H    7.44893   3.15517  -1.86141
C    5.34441   3.41595  -1.43039
C    5.09690   2.58507  -0.21694
N   -3.39207   3.07421  -0.11991
O   -1.46493   4.05606   0.77726
O   -5.60900   2.37624  -0.37087
C   -2.66389   3.85663   0.80386
C   -3.66448   4.36756   1.78779
C   -3.49353   5.19870   2.88890
H   -2.51286   5.58656   3.15332
C   -4.63565   5.51402   3.64258
H   -4.54411   6.16104   4.51197
C   -5.89752   5.00660   3.29288
H   -6.76323   5.26884   3.89670
C   -6.05682   4.16750   2.17846
H   -7.03046   3.77063   1.90180
C   -4.91820   3.86286   1.44054
C   -4.75458   3.01140   0.22716
N   -4.13654  -3.02126  -0.67713
O   -4.19574  -0.80410  -1.38870
O   -4.60685  -4.98912   0.48739
C   -4.70166  -1.73666  -0.78833
C   -5.98315  -1.78197  -0.02830
C   -6.94257  -0.79488   0.16781
H   -6.82107   0.19892  -0.25543
C   -8.05980  -1.13523   0.94863
H   -8.83524  -0.39355   1.12613
C   -8.19307  -2.41553   1.50922
H   -9.06980  -2.64569   2.11028
C   -7.21081  -3.39998   1.31141
H   -7.30317  -4.39073   1.74952
C   -6.11120  -3.05548   0.53393
C   -4.90829  -3.85430   0.15802
N    3.94510  -3.37501   0.63678
O    4.09969  -1.17119   1.37130
O    4.42250  -5.42205  -0.37154
C    4.59069  -2.13902   0.81515
C    5.94041  -2.28728   0.19858
C    6.98095  -1.37151   0.09348
H    6.88182  -0.36057   0.48011
C    8.15238  -1.80548  -0.54986
H    8.99118  -1.12095  -0.65332
C    8.26009  -3.10657  -1.06558
H    9.18075  -3.41028  -1.55856
C    7.19727  -4.01922  -0.95965
H    7.27116  -5.02629  -1.36265
C    6.04356  -3.58184  -0.31991
C    4.75607  -4.29007  -0.06157
O    1.04722   0.85257   1.59225
O    1.89675   0.85258  -0.50791
O   -1.71055   1.01486   0.47417
O   -0.86873   0.97016  -1.62853
O   -1.85443  -1.88599   0.41403
O   -0.92813  -1.95977  -1.65340
O    0.84081  -2.07073   1.55516
O    1.75877  -2.05959  -0.51619
C    1.89963   1.20503   0.71507
C    3.10233   2.02529   1.20956
H    3.82752   1.24385   1.47012
C    2.84652   2.85019   2.49879
C    4.19158   3.30282   3.10907
H    4.66405   4.04242   2.44854
H    4.87394   2.44474   3.14328
C    1.85831   4.01381   2.32348
H    0.93737   3.70353   1.82564
H    2.29583   4.82791   1.73513
H    1.58534   4.42377   3.30137
C   -1.68876   1.37966  -0.74511
C   -2.82980   2.29214  -1.22556
H   -3.61857   1.56964  -1.47259
C   -2.52861   3.09084  -2.52109
C   -1.45213   4.17585  -2.36244
H   -1.81869   5.02278  -1.77196
H   -1.16082   4.56075  -3.34522
H   -0.55183   3.79664  -1.87448
C   -3.84278   3.64300  -3.11661
H   -4.24879   4.41878  -2.45339
H   -4.58914   2.83956  -3.13840
C   -1.79130  -2.30406  -0.78781
C   -2.81068  -3.39380  -1.17541
H   -2.52303  -4.25832  -0.56353
C   -2.76691  -3.84635  -2.65756
C   -3.49453  -5.20072  -2.81499
H   -3.14022  -5.88798  -2.03672
H   -4.56841  -5.06388  -2.63139
C   -3.27399  -2.79202  -3.65473
H   -2.79367  -1.82487  -3.49665
H   -4.35766  -2.65120  -3.57262
H   -3.06028  -3.10966  -4.67990
C    1.65809  -2.49008   0.67939
C    2.56760  -3.68509   1.02903
H    2.25918  -4.47261   0.33034
C    2.46600  -4.28988   2.45515
C    2.86130  -3.32831   3.58788
H    2.15169  -2.50190   3.67601
H    3.85557  -2.90160   3.42845
H    2.88946  -3.86307   4.54240
C    1.08622  -4.95148   2.67601
H    0.81606  -5.51470   1.77199
H    0.32265  -4.17700   2.79911
H   -2.14433   2.33497  -3.21616
H   -1.70241  -4.01708  -2.86134
H    3.20450  -5.10424   2.43866
H    2.39729   2.12840   3.19107
C   -3.69671   4.21874  -4.53284
H   -4.67506   4.51085  -4.93091
H   -3.05653   5.10650  -4.55545
H   -3.26741   3.47872  -5.21937
C    4.07243   3.89429   4.52135
H    3.57880   3.19255   5.20480
H    5.06528   4.11209   4.93101
H    3.50228   4.82875   4.53260
C    1.04476  -5.91478   3.87150
H    0.06702  -6.40521   3.93413
H    1.80472  -6.70019   3.77784
H    1.21136  -5.39920   4.82299
C   -3.29705  -5.86601  -4.18490
H   -3.74880  -5.28700  -4.99661
H   -2.23215  -5.99207  -4.41574
H   -3.75817  -6.85987  -4.19709
134
CAT1-c(staggered model) Rh2C56N4H56O16
Rh   0.03068  -0.05805  -1.22781
Rh   0.02963  -0.03845   1.16750
N   -4.18660  -2.27708   1.26979
O   -4.62265  -0.00562   1.63458
O   -3.88779  -4.56090   1.65408
C   -4.63414  -1.16226   2.01123
C   -5.10697  -1.70603   3.31956
C   -5.67114  -1.05174   4.40879
H   -5.83435   0.02310   4.39605
C   -6.01810  -1.83379   5.52235
H   -6.46193  -1.35944   6.39462
C   -5.79992  -3.22101   5.53049
H   -6.07807  -3.79906   6.40869
C   -5.22771  -3.87050   4.42499
H   -5.05281  -4.94357   4.42443
C   -4.89039  -3.08529   3.32802
C   -4.26889  -3.46346   2.02729
N   -2.05178   4.23462  -1.35399
O   -3.74279   2.66280  -1.74533
O   -0.45144   5.89642  -1.71429
C   -3.06093   3.60139  -2.11128
C   -3.09946   4.31944  -3.42040
C   -3.92471   4.12624  -4.52239
H   -4.69278   3.35671  -4.52145
C   -3.72434   4.96207  -5.63288
H   -4.34953   4.84278  -6.51478
C   -2.72717   5.95083  -5.62563
H   -2.59579   6.58156  -6.50181
C   -1.89839   6.13525  -4.50740
H   -1.12222   6.89649  -4.49493
C   -2.10822   5.30263  -3.41354
C   -1.40350   5.23887  -2.10179
N    4.19763   2.28328   1.25155
O    4.71013   0.05385   1.75817
O    3.80185   4.57152   1.49933
C    4.66284   1.22921   2.06793
C    5.07143   1.86236   3.35761
C    5.62393   1.29099   4.49819
H    5.82734   0.22422   4.55050
C    5.90578   2.14572   5.57614
H    6.33856   1.73744   6.48656
C    5.63657   3.52190   5.49995
H    5.86501   4.15754   6.35232
C    5.07673   4.08723   4.34312
H    4.86280   5.15115   4.27705
C    4.80405   3.23041   3.28227
C    4.21160   3.51166   1.94427
N    2.11742  -4.33361  -1.30392
O    3.77610  -2.75184  -1.78850
O    0.60559  -6.09667  -1.52918
C    3.10228  -3.71558  -2.10234
C    3.13839  -4.49116  -3.37832
C    3.93388  -4.32059  -4.50546
H    4.67238  -3.52433  -4.55709
C    3.74305  -5.21532  -5.57099
H    4.34522  -5.11498  -6.47107
C    2.78539  -6.23947  -5.49511
H    2.66087  -6.91606  -6.33741
C    1.98749  -6.40167  -4.35108
H    1.24273  -7.19103  -4.28530
C    2.18617  -5.50952  -3.30325
C    1.50894  -5.41015  -1.97953
O   -1.83306  -0.97836  -1.15406
O   -1.77463  -1.06425   1.10981
O   -0.82669   1.83234  -1.17811
O   -0.93767   1.80129   1.08526
O    1.89512   0.86422  -1.16340
O    1.83289   0.98789   1.09851
O    0.88598  -1.94804  -1.14938
O    1.00247  -1.87604   1.11135
C   -2.29749  -1.32451  -0.02066
C   -3.52646  -2.24760  -0.03527
H   -3.08062  -3.24786  -0.12370
C   -4.46038  -2.08510  -1.26515
C   -5.44237  -3.27592  -1.33265
H   -6.14832  -3.21582  -0.49343
H   -4.88240  -4.20933  -1.19445
C   -5.17126  -0.72633  -1.35650
H   -4.47797   0.11074  -1.25038
H   -5.94289  -0.62140  -0.58707
H   -5.65792  -0.62575  -2.33191
C   -1.10387   2.35225  -0.05020
C   -1.55776   3.82076  -0.04073
H   -0.61159   4.36895   0.06579
C   -2.43097   4.23475   1.17487
C   -3.80671   3.55389   1.23990
H   -4.47938   3.92649   0.46082
H   -4.27548   3.75472   2.20859
H   -3.73703   2.46963   1.13057
C   -2.52568   5.77524   1.24555
H   -3.11838   6.14453   0.39784
H   -1.52163   6.20101   1.12501
C    2.35603   1.23227  -0.03537
C    3.57863   2.16282  -0.06859
H    3.12797   3.15112  -0.23317
C    4.54887   1.93540  -1.26024
C    5.53768   3.11842  -1.35703
H    4.97851   4.05919  -1.27699
H    6.22139   3.09455  -0.49784
C    5.25477   0.57086  -1.26687
H    4.55320  -0.25666  -1.14144
H    6.00398   0.49862  -0.47242
H    5.76567   0.42146  -2.22343
C    1.17130  -2.44644  -0.01362
C    1.64576  -3.90743   0.01557
H    0.71240  -4.47155   0.14429
C    2.57904  -4.33988   1.18899
C    3.80163  -3.43200   1.40035
H    3.51092  -2.44177   1.76162
H    4.36958  -3.29196   0.47859
H    4.47459  -3.87601   2.14071
C    1.76735  -4.55800   2.48788
H    0.86307  -5.13274   2.24643
H    1.42741  -3.59148   2.87290
H   -1.85063   3.89954   2.04292
H    3.89659   1.97737  -2.14088
H    2.94017  -5.32989   0.87660
H   -3.78312  -2.16648  -2.12385
C   -3.13091   6.30771   2.55265
H   -3.08883   7.40243   2.57585
H   -4.17982   6.01811   2.67127
H   -2.57978   5.93638   3.42529
C   -6.23026  -3.36643  -2.64768
H   -5.55647  -3.40036  -3.51255
H   -6.83952  -4.27699  -2.66686
H   -6.90717  -2.51709  -2.78402
C    2.53850  -5.31094   3.58190
H    1.88566  -5.51373   4.43839
H    2.91261  -6.27512   3.21565
H    3.39475  -4.73886   3.95353
C    6.35960   3.14517  -2.65397
H    7.03464   2.28721  -2.73383
H    5.70837   3.14273  -3.53658
H    6.97454   4.05101  -2.69882
37
R1  SiC11N2H20O3
C    1.18873  -2.19143   1.99532
C    0.97382  -1.12034   2.78169
H    1.71232  -3.06867   2.35999
H    0.83232  -2.20648   0.97025
C    0.12895   0.02124   2.33944
O    1.41324  -0.98666   4.06145
Si   2.96413  -1.24590   4.72537
C    4.23653  -0.38550   3.64438
H    5.24617  -0.49744   4.05758
H    4.24468  -0.81920   2.63779
H    4.01514   0.68114   3.54235
C    3.32080  -3.09838   4.79160
H    4.18421  -3.30890   5.43420
H    2.46929  -3.66531   5.18422
H    3.55891  -3.49527   3.79822
C    2.82198  -0.50606   6.47622
C    2.47632   0.99819   6.39342
C    1.71163  -1.23793   7.26563
C    4.16789  -0.67357   7.22060
H    3.25492   1.57108   5.87728
H    1.53583   1.17100   5.86134
H    2.37512   1.41696   7.40508
H    1.92699  -2.30638   7.38658
H    1.61753  -0.80883   8.27343
H    0.73692  -1.14480   6.77410
H    4.09731  -0.24156   8.22867
H    4.45003  -1.72640   7.34091
H    4.99094  -0.16149   6.70752
C    0.48232   1.43534   2.50968
O    1.55282   1.82587   2.94571
O   -0.52188   2.26000   2.11074
C   -0.24144   3.67345   2.20724
H    0.62316   3.93489   1.59203
H   -1.13863   4.17086   1.83787
H   -0.04734   3.95386   3.24541
N   -1.01076  -0.25587   1.73537
N   -1.99343  -0.49854   1.21062
22
R2  C12N3H7
C   -8.45949   0.87680   0.00036
C   -7.07976   0.88594   0.00014
C   -6.38012   2.12672   0.00021
C   -7.12034   3.35032   0.00050
C   -8.53596   3.30983   0.00072
C   -9.19316   2.09305   0.00065
H   -4.38040   1.26344  -0.00022
H   -8.99419  -0.07001   0.00030
H   -6.51834  -0.04581  -0.00008
C   -4.97295   2.17169   0.00000
C   -6.36291   4.55490   0.00056
H   -9.09634   4.24233   0.00094
H  -10.28001   2.06198   0.00081
C   -4.99989   4.53605   0.00034
H   -6.86132   5.52081   0.00078
H   -4.40070   5.43780   0.00038
N   -4.28927   3.33662   0.00006
C   -2.87263   3.36728  -0.00016
C   -2.19593   4.59852  -0.00007
N   -1.63852   5.63139   0.00000
C   -2.16305   2.15499  -0.00043
N   -1.60063   1.12488  -0.00065
171
COM1-I  Rh2SiC67N6H76O19
Rh  -0.23841   0.06724  -0.45809
Rh  -0.78667   0.19560  -2.82123
N    2.21444   4.10660  -1.08617
O    3.21560   2.28188  -2.13975
O    1.75911   5.78601   0.46953
C    3.24523   3.17131  -1.30689
C    4.32306   3.50361  -0.33357
C    5.56175   2.90637  -0.13228
H    5.87714   2.04803  -0.72023
C    6.37629   3.44674   0.87643
H    7.35369   3.00946   1.06704
C    5.94888   4.53836   1.64899
H    6.60374   4.93253   2.42282
C    4.68795   5.12220   1.44436
H    4.34576   5.96013   2.04673
C    3.89142   4.58238   0.44157
C    2.51457   4.94871   0.00069
N   -4.54460   2.02382   0.51497
O   -3.13404   3.77992  -0.11589
O   -5.85847   0.59997   1.82223
C   -3.86660   3.24513   0.69745
C   -4.22823   3.71459   2.06851
C   -3.87729   4.88087   2.73879
H   -3.24825   5.63286   2.26817
C   -4.37361   5.05115   4.04168
H   -4.12380   5.95145   4.59839
C   -5.18994   4.07720   4.63872
H   -5.55805   4.23712   5.64951
C   -5.53950   2.90416   3.95017
H   -6.17306   2.14668   4.40506
C   -5.04478   2.74891   2.66016
C   -5.23637   1.64026   1.67944
N   -2.71719  -4.02186  -0.33796
O   -4.10805  -2.16205  -0.56955
O   -1.58950  -5.84157   0.59654
C   -3.73424  -3.13497   0.06330
C   -4.21769  -3.62740   1.38459
C   -5.21288  -3.12648   2.21608
H   -5.77645  -2.23612   1.94815
C   -5.44375  -3.80896   3.42184
H   -6.21329  -3.45057   4.10164
C   -4.69401  -4.94429   3.76894
H   -4.89712  -5.44940   4.71051
C   -3.68310  -5.43242   2.92455
H   -3.09210  -6.30504   3.19168
C   -3.46446  -4.75147   1.73255
C   -2.46604  -4.99526   0.64997
N    3.98819  -1.91744  -1.69897
O    2.35728  -3.59311  -1.70414
O    5.84237  -0.63289  -1.08704
C    3.41160  -3.13624  -1.29705
C    4.34334  -3.71986  -0.28636
C    4.27584  -4.92388   0.40491
H    3.45066  -5.61526   0.25149
C    5.31403  -5.20843   1.30726
H    5.29912  -6.14110   1.86652
C    6.37381  -4.30757   1.49961
H    7.16303  -4.55637   2.20536
C    6.42930  -3.09327   0.79603
H    7.24573  -2.39005   0.94097
C    5.39701  -2.82395  -0.09534
C    5.16742  -1.64382  -0.98017
O    0.46299   2.02153  -0.61617
O   -0.17804   2.18452  -2.78656
O   -2.16928   0.76227  -0.07059
O   -2.71484   0.74914  -2.27092
O   -0.99790  -1.87502  -0.47917
O   -1.35712  -1.80793  -2.71762
O    1.64916  -0.62165  -1.04568
O    1.16129  -0.37120  -3.24762
C    0.36094   2.63057  -1.72914
C    0.89889   4.07623  -1.73729
H    0.23782   4.61535  -1.04785
C    0.82654   4.80205  -3.10440
C    0.96825   6.32722  -2.89934
H    1.98361   6.55821  -2.55043
H    0.29246   6.64138  -2.09431
C    1.80553   4.26135  -4.15902
H    1.73556   3.17639  -4.25212
H    2.84239   4.51605  -3.91100
H    1.58487   4.69804  -5.13802
C   -2.98358   0.89906  -1.04114
C   -4.45293   1.16245  -0.66783
H   -4.79545   0.18004  -0.32091
C   -5.37045   1.56973  -1.84957
C   -5.05981   2.94852  -2.45427
H   -5.34905   3.76114  -1.77874
H   -5.61339   3.08371  -3.38883
H   -3.99679   3.05847  -2.67810
C   -6.85323   1.42810  -1.43939
H   -7.09981   2.18544  -0.68282
H   -6.99552   0.45479  -0.95428
C   -1.38695  -2.37518  -1.58562
C   -1.86215  -3.84085  -1.51729
H   -0.95097  -4.40667  -1.28563
C   -2.43612  -4.41245  -2.83809
C   -2.46549  -5.95623  -2.77711
H   -1.49216  -6.31599  -2.42159
H   -3.20058  -6.28064  -2.02847
C   -3.79433  -3.81758  -3.24312
H   -3.77514  -2.72640  -3.22657
H   -4.59506  -4.15428  -2.57466
H   -4.05792  -4.13329  -4.25731
C    1.93906  -0.65289  -2.28378
C    3.40279  -0.96266  -2.64449
H    3.91183  -0.01549  -2.43073
C    3.65937  -1.28401  -4.14032
C    5.16908  -1.22885  -4.43696
H    5.70557  -2.05049  -3.94738
H    5.61190  -0.28866  -4.09222
H    5.35645  -1.30923  -5.51180
C    3.01502  -2.59472  -4.63872
H    1.99360  -2.66268  -4.25554
H    3.55784  -3.45344  -4.22351
H   -5.16725   0.81418  -2.61750
H   -1.70201  -4.12507  -3.60078
H    3.18197  -0.45569  -4.67655
H   -0.19280   4.60943  -3.46142
C   -7.84268   1.54494  -2.60822
H   -8.86491   1.34647  -2.26672
H   -7.83710   2.54276  -3.05858
H   -7.61051   0.81992  -3.39781
C    0.66250   7.16236  -4.15132
H   -0.33559   6.93539  -4.54561
H    0.68951   8.23194  -3.91431
H    1.38640   6.98778  -4.95375
C    2.97442  -2.71411  -6.17008
H    2.45612  -3.63216  -6.46953
H    2.43540  -1.86968  -6.61655
H    3.97463  -2.74563  -6.61562
C   -2.77967  -6.63289  -4.11946
H   -3.79428  -6.41391  -4.46735
H   -2.08079  -6.30875  -4.90026
H   -2.69333  -7.72155  -4.02907
C    1.46589  -2.25431   1.74668
C    1.14012  -1.18695   2.48363
H    2.06711  -3.05737   2.16176
H    1.13510  -2.34074   0.72151
C    0.22968  -0.08096   1.98857
O    1.48054  -0.99391   3.79565
Si   2.95267  -1.24258   4.61904
C    4.34397  -0.46871   3.62513
H    5.30250  -0.56722   4.14888
H    4.44858  -0.96382   2.65350
H    4.15838   0.59175   3.42922
C    3.25193  -3.09384   4.83482
H    4.01527  -3.28165   5.59973
H    2.34054  -3.61981   5.14030
H    3.61010  -3.55444   3.90722
C    2.65975  -0.39523   6.30344
C    2.28602   1.09028   6.09801
C    1.51155  -1.10500   7.05768
C    3.95033  -0.47637   7.15286
H    3.07332   1.64591   5.57596
H    1.36348   1.19785   5.51817
H    2.12787   1.57813   7.07061
H    1.74550  -2.15488   7.27029
H    1.32746  -0.61052   8.02224
H    0.57519  -1.07819   6.48909
H    3.79006  -0.00036   8.13042
H    4.25784  -1.51124   7.34615
H    4.79168   0.04033   6.67585
C    0.66880   1.32545   2.27745
O    1.83413   1.66487   2.25608
O   -0.37117   2.13526   2.55819
C   -0.04432   3.52737   2.77926
H    0.34983   3.97200   1.86487
H   -0.98556   3.99957   3.05928
H    0.68865   3.61999   3.58407
N   -1.05861  -0.32712   2.37110
N   -2.13144  -0.56976   2.61196
171
COM1-II Rh2SiC67N6H76O19
Rh  -1.28841   0.81986  -0.03888
Rh   0.75433  -0.48253  -0.19221
N    0.42275   3.54303  -3.53999
O    1.55992   3.82187  -1.52087
O   -1.02081   3.91389  -5.33829
C    0.85616   4.26671  -2.41241
C    0.27783   5.63358  -2.54771
C    0.39462   6.74064  -1.71475
H    0.97142   6.69746  -0.79428
C   -0.28339   7.90804  -2.10285
H   -0.21997   8.79647  -1.47885
C   -1.04861   7.94694  -3.27932
H   -1.56280   8.86620  -3.55038
C   -1.16805   6.81682  -4.10492
H   -1.76869   6.83629  -5.01094
C   -0.49172   5.66734  -3.71337
C   -0.44186   4.31514  -4.34311
N   -3.59547  -2.49218  -2.60730
O   -2.51924  -1.06825  -4.11974
O   -5.26967  -3.51373  -1.33670
C   -3.53729  -1.54632  -3.65259
C   -4.95313  -1.27180  -4.03766
C   -5.46769  -0.44181  -5.02691
H   -4.81214   0.13852  -5.67152
C   -6.86487  -0.38078  -5.15480
H   -7.30702   0.25765  -5.91613
C   -7.70309  -1.12901  -4.31280
H   -8.78140  -1.05919  -4.43575
C   -7.17096  -1.96151  -3.31489
H   -7.81400  -2.54074  -2.65689
C   -5.78652  -2.01471  -3.19896
C   -4.92642  -2.78006  -2.25020
N   -2.61654  -1.90656   3.61760
O   -2.75465  -3.02998   1.57553
O   -3.22382  -0.74675   5.55250
C   -3.28749  -2.56791   2.57067
C   -4.73244  -2.56549   2.93529
C   -5.82606  -3.09285   2.25778
H   -5.70686  -3.59685   1.30180
C   -7.08755  -2.92790   2.85323
H   -7.97034  -3.32490   2.35737
C   -7.23117  -2.25354   4.07639
H   -8.22237  -2.14165   4.50988
C   -6.11833  -1.71532   4.74356
H   -6.22391  -1.18287   5.68558
C   -4.87410  -1.88615   4.14780
C   -3.52325  -1.41941   4.58028
N    0.87470   3.95749   2.79340
O    0.18493   2.11552   4.05877
O    0.94007   6.09378   1.85008
C    0.12664   3.30313   3.79480
C   -0.72144   4.35538   4.42762
C   -1.62317   4.26452   5.48153
H   -1.80407   3.31920   5.98730
C   -2.29295   5.43974   5.85913
H   -3.00734   5.41075   6.67859
C   -2.05889   6.65347   5.19315
H   -2.59478   7.54591   5.50807
C   -1.14845   6.73109   4.12664
H   -0.96627   7.66634   3.60310
C   -0.48991   5.56181   3.76310
C    0.50824   5.31164   2.68259
O   -0.75230   1.73211  -1.82776
O    1.10639   0.44997  -2.03064
O   -2.25781  -0.71374  -1.04932
O   -0.36958  -1.96527  -1.14115
O   -1.69284  -0.13787   1.74784
O    0.25071  -1.30835   1.66447
O   -0.23948   2.27652   0.98812
O    1.69508   1.10844   0.80388
C    0.31683   1.37267  -2.40951
C    0.61980   2.10101  -3.73602
H   -0.20101   1.79905  -4.39837
C    1.94556   1.70887  -4.43399
C    1.90234   2.12388  -5.92218
H    1.89660   3.21925  -5.99800
H    0.95379   1.78605  -6.35710
C    3.20532   2.22512  -3.72130
H    3.19933   1.96973  -2.66066
H    3.29540   3.31403  -3.80938
H    4.10177   1.78364  -4.16736
C   -1.61458  -1.77154  -1.32629
C   -2.44985  -2.96481  -1.82435
H   -2.89111  -3.34958  -0.89607
C   -1.64930  -4.12791  -2.46229
C   -1.02493  -3.79547  -3.82666
H   -1.78695  -3.71727  -4.60993
H   -0.32400  -4.58155  -4.12484
H   -0.47704  -2.85155  -3.80053
C   -2.52307  -5.40130  -2.51142
H   -3.35300  -5.24905  -3.21443
H   -2.98277  -5.55367  -1.52729
C   -0.84761  -0.97027   2.20569
C   -1.19379  -1.54175   3.59639
H   -1.11928  -0.67087   4.25947
C   -0.23152  -2.62639   4.13767
C   -0.32360  -2.69824   5.67824
H   -0.22574  -1.68379   6.08412
H   -1.32231  -3.04699   5.97291
C   -0.42335  -4.00048   3.47908
H   -0.44999  -3.91689   2.39137
H   -1.35811  -4.47365   3.80315
H    0.39760  -4.67007   3.75266
C    1.00632   2.11233   1.17122
C    1.74808   3.29503   1.81960
H    1.83307   4.01208   0.99397
C    3.18831   3.01022   2.31595
C    3.90785   4.34047   2.60692
H    3.47937   4.84390   3.48168
H    3.83718   5.02895   1.75826
H    4.96955   4.17346   2.81061
C    3.28209   2.02218   3.49648
H    2.64843   1.15592   3.28998
H    2.87905   2.49142   4.40242
H   -0.83203  -4.31145  -1.75482
H    0.77092  -2.26575   3.87893
H    3.68322   2.54411   1.45580
H    1.96102   0.61239  -4.39814
C   -1.76094  -6.67552  -2.90315
H   -2.41501  -7.55169  -2.83075
H   -1.38256  -6.63437  -3.92955
H   -0.90484  -6.84711  -2.23852
C    3.05685   1.56426  -6.76607
H    3.10948   0.47108  -6.69143
H    2.91586   1.81698  -7.82292
H    4.02801   1.96738  -6.46133
C    4.71066   1.53098   3.77462
H    4.70668   0.77107   4.56394
H    5.14941   1.07348   2.87959
H    5.37679   2.33686   4.10102
C    0.73994  -3.59349   6.33052
H    0.61335  -4.64842   6.06597
H    1.75055  -3.29215   6.02930
H    0.68354  -3.52226   7.42261
C    4.40975   0.04082  -0.42625
C    4.21841  -1.27881  -0.52575
H    5.41112   0.46100  -0.42774
H    3.57073   0.71412  -0.32469
C    2.84883  -1.92464  -0.61160
O    5.20797  -2.21548  -0.66133
Si   6.71105  -2.38765   0.12768
C    6.44482  -2.23807   1.97994
H    7.39196  -2.34625   2.52204
H    6.03018  -1.25680   2.23533
H    5.74211  -2.99037   2.35093
C    7.90075  -1.05154  -0.47251
H    8.93608  -1.30222  -0.21161
H    7.85471  -0.92398  -1.55973
H    7.68301  -0.08118  -0.01211
C    7.28856  -4.12196  -0.41686
C    6.22656  -5.18085  -0.04289
C    7.50989  -4.14832  -1.94704
C    8.61787  -4.46945   0.29438
H    6.03982  -5.21484   1.03663
H    5.27131  -4.98685  -0.54214
H    6.56545  -6.18079  -0.34929
H    8.28969  -3.44518  -2.26249
H    7.82642  -5.15096  -2.26803
H    6.59327  -3.90095  -2.49430
H    8.96613  -5.46322  -0.02003
H    9.41724  -3.75809   0.05407
H    8.50834  -4.49520   1.38509
C    2.64096  -3.11212   0.27966
O    3.06399  -3.15880   1.41707
O    1.96718  -4.10749  -0.33506
C    1.75777  -5.30395   0.44887
H    1.19974  -5.07172   1.35593
H    1.18613  -5.97286  -0.19479
H    2.71886  -5.75324   0.71156
N    2.52756  -2.16999  -1.91390
N    2.23087  -2.28893  -2.99383
171
TS1-I Rh2SiC67N6H76O19
Rh  -0.15782   0.03469  -0.48073
Rh  -0.58357   0.19847  -2.89592
N    2.47051   3.99206  -0.94197
O    3.49316   2.16675  -1.97474
O    1.95845   5.64433   0.62540
C    3.49242   3.03803  -1.12279
C    4.51829   3.32609  -0.08110
C    5.73083   2.69817   0.17792
H    6.06128   1.84556  -0.40979
C    6.49583   3.19953   1.24398
H    7.45174   2.73790   1.48079
C    6.04610   4.28325   2.01503
H    6.66276   4.64710   2.83385
C    4.81115   4.89801   1.75093
H    4.45158   5.73050   2.35075
C    4.06388   4.39685   0.69174
C    2.72281   4.80165   0.17974
N   -4.37739   2.24708   0.26902
O   -2.82451   3.90480  -0.29066
O   -5.82964   0.90635   1.51623
C   -3.62344   3.41741   0.48864
C   -4.00535   3.90304   1.84866
C   -3.59905   5.03684   2.54296
H   -2.89726   5.74307   2.10548
C   -4.13588   5.23518   3.82571
H   -3.84566   6.11210   4.39991
C   -5.04471   4.31957   4.38014
H   -5.44309   4.50063   5.37578
C   -5.44786   3.17814   3.66814
H   -6.15280   2.46594   4.09001
C   -4.91200   2.99474   2.39830
C   -5.13787   1.90593   1.40232
N   -2.87941  -3.90373  -0.50925
O   -4.14719  -1.96386  -0.79219
O   -1.90312  -5.78682   0.46946
C   -3.86187  -2.96123  -0.15180
C   -4.43854  -3.43120   1.14041
C   -5.44539  -2.87867   1.92385
H   -5.94483  -1.95766   1.63320
C   -5.77559  -3.55223   3.11139
H   -6.55829  -3.15459   3.75332
C   -5.10925  -4.72952   3.48782
H   -5.38871  -5.22697   4.41377
C   -4.08563  -5.27023   2.69212
H   -3.55983  -6.17668   2.98201
C   -3.76850  -4.59747   1.51761
C   -2.73288  -4.89281   0.48340
N    4.08614  -2.04521  -1.49210
O    2.46144  -3.72791  -1.53320
O    5.90836  -0.74217  -0.82495
C    3.49062  -3.25263  -1.08481
C    4.36521  -3.80122  -0.00520
C    4.26059  -4.98322   0.71892
H    3.44771  -5.68289   0.53928
C    5.24656  -5.23601   1.68692
H    5.20234  -6.15133   2.27274
C    6.29238  -4.32596   1.91019
H    7.04103  -4.54980   2.66671
C    6.38618  -3.13472   1.17210
H    7.19255  -2.42502   1.33993
C    5.40565  -2.89714   0.21562
C    5.22565  -1.74797  -0.72009
O    0.64222   1.95526  -0.60488
O    0.12173   2.16208  -2.80539
O   -2.07219   0.83632  -0.20760
O   -2.50919   0.85345  -2.43375
O   -1.02289  -1.86836  -0.55605
O   -1.26435  -1.77780  -2.81204
O    1.72186  -0.74645  -0.98669
O    1.36346  -0.46467  -3.21049
C    0.61608   2.57697  -1.71737
C    1.19585   4.00660  -1.67098
H    0.50959   4.55388  -1.01346
C    1.22630   4.75504  -3.02725
C    1.39746   6.27213  -2.78751
H    2.39574   6.46822  -2.37368
H    0.68267   6.59291  -2.01959
C    2.25115   4.20339  -4.03144
H    2.15731   3.12219  -4.14550
H    3.27815   4.42560  -3.71940
H    2.09996   4.66000  -5.01461
C   -2.82503   1.02221  -1.22080
C   -4.29030   1.38248  -0.91301
H   -4.71457   0.42568  -0.58598
C   -5.12344   1.85280  -2.13272
C   -4.69411   3.20919  -2.71497
H   -4.95928   4.03788  -2.04907
H   -5.19353   3.38327  -3.67334
H   -3.61692   3.24755  -2.88916
C   -6.62979   1.80848  -1.79206
H   -6.86047   2.57799  -1.04270
H   -6.85827   0.84511  -1.32002
C   -1.38696  -2.33854  -1.68580
C   -1.96046  -3.77123  -1.64687
H   -1.10129  -4.39854  -1.37843
C   -2.51013  -4.29726  -2.99668
C   -2.65737  -5.83458  -2.94507
H   -1.73326  -6.26663  -2.54167
H   -3.45253  -6.10415  -2.23703
C   -3.79800  -3.60157  -3.46682
H   -3.69831  -2.51511  -3.44169
H   -4.65545  -3.88016  -2.84345
H   -4.03077  -3.89357  -4.49560
C    2.07628  -0.77470  -2.21003
C    3.55122  -1.11606  -2.49253
H    4.06264  -0.16820  -2.28588
C    3.86992  -1.48583  -3.96513
C    5.39294  -1.47842  -4.19037
H    5.88257  -2.30171  -3.65622
H    5.84485  -0.54192  -3.84730
H    5.62881  -1.59074  -5.25277
C    3.21272  -2.79142  -4.45987
H    2.17321  -2.82136  -4.12296
H    3.71094  -3.65357  -3.99877
H   -4.93451   1.08742  -2.89456
H   -1.71965  -4.06399  -3.72042
H    3.44077  -0.66017  -4.54433
H    0.22542   4.59655  -3.44748
C   -7.55444   1.99406  -3.00424
H   -8.60228   1.86239  -2.71143
H   -7.46233   2.99072  -3.44773
H   -7.33402   1.25788  -3.78683
C    1.19221   7.13546  -4.04091
H    0.21414   6.94350  -4.49884
H    1.23456   8.20007  -3.78436
H    1.95853   6.95238  -4.80096
C    3.23795  -2.94901  -5.98812
H    2.70870  -3.86053  -6.28847
H    2.74294  -2.10245  -6.47918
H    4.25610  -3.01829  -6.38639
C   -2.95134  -6.48458  -4.30509
H   -3.92712  -6.18925  -4.70389
H   -2.19051  -6.21310  -5.04707
H   -2.95189  -7.57678  -4.21576
C    1.23405  -2.33942   1.72940
C    0.86775  -1.22984   2.39310
H    1.71394  -3.16953   2.23931
H    1.06787  -2.42117   0.66492
C    0.25058  -0.07799   1.68711
O    0.97908  -1.05189   3.74819
Si   2.21896  -1.45247   4.84960
C    3.85666  -0.85598   4.15080
H    4.67671  -1.05250   4.85187
H    4.09551  -1.37480   3.21564
H    3.83687   0.21586   3.92973
C    2.25797  -3.32111   5.10958
H    2.82980  -3.57969   6.00903
H    1.25097  -3.73659   5.22688
H    2.73726  -3.83668   4.26961
C    1.69990  -0.54570   6.44543
C    1.52705   0.96551   6.17145
C    0.36235  -1.11952   6.96805
C    2.79101  -0.73982   7.52514
H    2.44995   1.42677   5.80139
H    0.73954   1.15356   5.43432
H    1.24742   1.48757   7.09768
H    0.44202  -2.18268   7.22363
H    0.05117  -0.58811   7.87871
H   -0.44190  -1.01028   6.23173
H    2.49685  -0.23248   8.45450
H    2.94962  -1.79643   7.77258
H    3.75550  -0.31833   7.21808
C    0.69976   1.25586   2.21001
O    1.88636   1.52761   2.21064
O   -0.28630   2.09124   2.57286
C    0.12485   3.43445   2.92780
H    0.53650   3.94397   2.05575
H   -0.78523   3.92937   3.26618
H    0.86796   3.40333   3.72776
N   -1.41601  -0.19849   2.34375
N   -2.48562  -0.46417   2.46718
171
TS1-II Rh2SiC67N6H76O19
Rh  -1.25805   0.83489   0.35422
Rh   0.66368  -0.18111  -0.80096
N   -0.70048   4.45520  -2.51186
O    1.05132   4.08564  -1.01460
O   -2.64190   5.31509  -3.48067
C    0.08706   4.73742  -1.37900
C   -0.50155   5.95045  -0.75183
C   -0.13166   6.62483   0.40581
H    0.70089   6.29062   1.01980
C   -0.90441   7.74033   0.76926
H   -0.65430   8.29165   1.67257
C   -2.00104   8.14901  -0.00735
H   -2.57954   9.01614   0.30296
C   -2.37206   7.44748  -1.16715
H   -3.23100   7.74491  -1.76343
C   -1.60352   6.34384  -1.51562
C   -1.76936   5.36608  -2.63053
N   -4.13618  -2.18881  -1.95389
O   -3.62930  -0.39956  -3.36858
O   -5.27465  -3.58475  -0.46883
C   -4.43489  -1.04538  -2.72292
C   -5.90050  -0.81935  -2.56401
C   -6.72209   0.15175  -3.12220
H   -6.32136   0.90608  -3.79472
C   -8.08323   0.12056  -2.77566
H   -8.75992   0.86456  -3.18950
C   -8.58593  -0.85436  -1.89855
H   -9.64421  -0.85055  -1.64802
C   -7.74333  -1.82902  -1.33842
H   -8.12154  -2.58477  -0.65459
C   -6.39986  -1.78803  -1.69028
C   -5.26515  -2.65494  -1.26120
N   -1.02563  -2.69294   3.45687
O   -1.82512  -3.35946   1.36569
O   -0.98315  -1.92302   5.65975
C   -2.00761  -3.14479   2.55193
C   -3.26598  -3.27152   3.33460
C   -4.52980  -3.67969   2.92628
H   -4.72212  -3.97030   1.89646
C   -5.54535  -3.67303   3.89753
H   -6.55118  -3.98236   3.62284
C   -5.28740  -3.26557   5.21681
H   -6.09686  -3.26979   5.94327
C   -4.00612  -2.84211   5.60979
H   -3.80187  -2.51076   6.62484
C   -3.00837  -2.85425   4.64317
C   -1.58033  -2.42645   4.72035
N    1.76067   2.99104   3.15504
O    1.68506   0.67725   3.45907
O    1.27370   5.26263   3.36927
C    1.42455   1.80497   3.84082
C    0.69501   2.22536   5.06606
C    0.13274   1.45329   6.07551
H    0.18388   0.36715   6.05415
C   -0.53119   2.13885   7.10669
H   -0.99070   1.57448   7.91475
C   -0.62158   3.54062   7.10717
H   -1.14498   4.03988   7.91939
C   -0.06172   4.30610   6.06996
H   -0.14430   5.38993   6.05323
C    0.59249   3.61927   5.05482
C    1.22644   4.12052   3.80016
O   -1.41288   2.13454  -1.26312
O    0.28439   1.12786  -2.38667
O   -2.44619  -0.60629  -0.56034
O   -0.65684  -1.59563  -1.55338
O   -0.91851  -0.48898   1.90605
O    0.92240  -1.35161   0.88583
O    0.06252   2.14724   1.24340
O    1.83908   1.27782   0.12269
C   -0.57733   2.04829  -2.21023
C   -0.65798   3.18411  -3.24725
H   -1.65572   3.08592  -3.69067
C    0.37647   3.13440  -4.39031
C   -0.06008   4.08953  -5.52100
H   -0.03947   5.12207  -5.14791
H   -1.10631   3.88195  -5.77754
C    1.81704   3.39834  -3.92783
H    2.07235   2.78070  -3.06717
H    1.95180   4.44722  -3.64114
H    2.52483   3.17643  -4.73228
C   -1.89121  -1.51146  -1.24766
C   -2.78595  -2.67841  -1.68100
H   -2.87840  -3.27089  -0.76354
C   -2.19527  -3.59631  -2.77201
C   -1.97750  -2.89891  -4.12298
H   -2.92997  -2.68670  -4.61980
H   -1.38359  -3.53271  -4.78912
H   -1.44923  -1.95235  -3.99708
C   -3.05328  -4.87207  -2.89440
H   -4.04063  -4.60579  -3.29496
H   -3.23202  -5.27786  -1.89101
C    0.07749  -1.27188   1.82913
C    0.28630  -2.18304   3.04476
H    0.59115  -1.49197   3.83701
C    1.38504  -3.25398   2.89412
C    1.77450  -3.79187   4.28577
H    1.99132  -2.94206   4.94549
H    0.91345  -4.31018   4.72961
C    1.01433  -4.37314   1.91153
H    0.65776  -3.95525   0.97118
H    0.23004  -5.01837   2.32477
H    1.88767  -4.99273   1.69020
C    1.29738   2.05223   0.96975
C    2.19310   3.02060   1.75317
H    1.89527   4.00567   1.38253
C    3.71201   2.88410   1.53741
C    4.41391   4.12139   2.12482
H    4.31796   4.14249   3.21685
H    3.97975   5.04868   1.73568
H    5.48026   4.12623   1.88247
C    4.30824   1.56512   2.06486
H    3.69029   0.73284   1.71973
H    4.25500   1.55553   3.16056
H   -1.21356  -3.88213  -2.38088
H    2.24622  -2.71641   2.48029
H    3.83910   2.89969   0.44742
H    0.32261   2.10767  -4.77445
C   -2.42686  -5.96505  -3.77094
H   -3.04202  -6.87165  -3.75908
H   -2.32662  -5.64978  -4.81447
H   -1.42882  -6.23880  -3.40646
C    0.79463   3.98636  -6.79155
H    0.83052   2.95351  -7.15969
H    0.37658   4.60986  -7.58968
H    1.82453   4.31704  -6.62293
C    5.75889   1.33917   1.61873
H    6.12254   0.36375   1.95680
H    5.83356   1.35887   0.52481
H    6.44202   2.09844   2.01349
C    2.98769  -4.73194   4.27045
H    2.77816  -5.66300   3.73395
H    3.84757  -4.25340   3.78536
H    3.28520  -4.99977   5.29065
C    3.96578   0.63152  -1.88136
C    3.69573  -0.68374  -1.97121
H    4.97650   0.99651  -2.04001
H    3.19116   1.34269  -1.63409
C    2.31118  -1.20356  -1.83686
O    4.64462  -1.62457  -2.27708
Si   5.98697  -2.07642  -1.32462
C    5.48295  -2.18611   0.47726
H    6.36678  -2.13695   1.12426
H    4.82147  -1.35641   0.74581
H    4.93627  -3.10805   0.68924
C    7.33796  -0.78640  -1.55360
H    8.29577  -1.15189  -1.16336
H    7.48003  -0.54022  -2.61161
H    7.10397   0.13887  -1.01634
C    6.50058  -3.74893  -2.06212
C    5.27736  -4.68931  -2.13152
C    7.06746  -3.55230  -3.48573
C    7.58427  -4.38241  -1.16002
H    4.81483  -4.83942  -1.14995
H    4.50907  -4.28901  -2.80143
H    5.57934  -5.67432  -2.51551
H    7.96958  -2.92925  -3.48631
H    7.33992  -4.52307  -3.92393
H    6.33349  -3.08399  -4.15209
H    7.90627  -5.34801  -1.57458
H    8.47808  -3.75079  -1.08113
H    7.21429  -4.56960  -0.14492
C    2.24017  -2.67432  -1.56629
O    2.72529  -3.10574  -0.53845
O    1.58032  -3.41296  -2.47436
C    1.39339  -4.80282  -2.11544
H    0.78167  -4.87653  -1.21358
H    0.88240  -5.25268  -2.96655
H    2.35904  -5.28398  -1.94506
N    1.70959  -1.09397  -3.51262
N    1.16774  -0.66972  -4.38406
169
M1a-I Rh2SiC67N4H76O19
Rh  -0.07699   0.02574  -0.46533
Rh  -0.43254   0.09380  -2.91152
N    2.34845   4.07677  -0.90180
O    3.52767   2.28419  -1.82202
O    1.62838   5.70248   0.61197
C    3.41970   3.16474  -0.98583
C    4.34163   3.50325   0.13479
C    5.55706   2.93343   0.49519
H    5.97605   2.09928  -0.06212
C    6.20741   3.46983   1.61859
H    7.16154   3.05435   1.93474
C    5.64463   4.53085   2.34587
H    6.17352   4.92302   3.21166
C    4.40847   5.08701   1.97824
H    3.96155   5.90096   2.54376
C    3.77531   4.55187   0.86276
C    2.46475   4.89527   0.23790
N   -4.45081   2.04037   0.04065
O   -3.00816   3.77529  -0.57557
O   -5.85132   0.67710   1.32275
C   -3.80709   3.28234   0.20090
C   -4.29963   3.83603   1.49812
C   -4.03121   5.05338   2.11365
H   -3.37063   5.78358   1.65214
C   -4.64768   5.30075   3.35137
H   -4.46529   6.24268   3.86365
C   -5.49771   4.35049   3.93977
H   -5.95938   4.57039   4.89963
C   -5.76190   3.12480   3.30695
H   -6.42044   2.38506   3.75549
C   -5.14955   2.89388   2.08031
C   -5.23461   1.71843   1.16375
N   -2.60064  -4.03167  -0.45316
O   -3.98122  -2.19270  -0.85625
O   -1.50931  -5.77889   0.64719
C   -3.64226  -3.13058  -0.15580
C   -4.20186  -3.56128   1.15692
C   -5.24635  -3.02647   1.90216
H   -5.79537  -2.15339   1.55794
C   -5.54675  -3.65094   3.12400
H   -6.35642  -3.26431   3.73859
C   -4.81585  -4.76377   3.56999
H   -5.07396  -5.22431   4.52091
C   -3.75422  -5.28558   2.81252
H   -3.17832  -6.14122   3.15661
C   -3.46655  -4.66174   1.60388
C   -2.40102  -4.94674   0.59834
N    4.22785  -1.96099  -1.22401
O    2.62259  -3.66218  -1.29728
O    5.97693  -0.59986  -0.48053
C    3.61758  -3.15789  -0.80532
C    4.42515  -3.65152   0.35010
C    4.28671  -4.80597   1.11234
H    3.49682  -5.52470   0.90716
C    5.20943  -5.00656   2.15227
H    5.13751  -5.89903   2.76971
C    6.22747  -4.07364   2.40727
H    6.92729  -4.25738   3.21927
C    6.35611  -2.91087   1.63003
H    7.14182  -2.18420   1.82157
C    5.43825  -2.72478   0.60256
C    5.30653  -1.61473  -0.38677
O    0.65000   1.96218  -0.62632
O    0.17741   2.09571  -2.84374
O   -2.02981   0.76178  -0.28849
O   -2.40041   0.65573  -2.52749
O   -0.87861  -1.90657  -0.53252
O   -1.02833  -1.91041  -2.79812
O    1.82686  -0.72145  -0.87955
O    1.56535  -0.48951  -3.12245
C    0.62054   2.55773  -1.75561
C    1.12866   4.01321  -1.71606
H    0.37494   4.54423  -1.12168
C    1.21291   4.72486  -3.08904
C    1.31656   6.25272  -2.88175
H    2.28141   6.49464  -2.41601
H    0.54686   6.56644  -2.16568
C    2.31245   4.18413  -4.01700
H    2.26144   3.09766  -4.10693
H    3.31150   4.44893  -3.65237
H    2.20350   4.60997  -5.01937
C   -2.76096   0.85083  -1.33039
C   -4.25782   1.11383  -1.07925
H   -4.61521   0.14811  -0.70311
C   -5.08835   1.44089  -2.34726
C   -4.75471   2.79259  -2.99914
H   -5.11009   3.63315  -2.39260
H   -5.23561   2.86747  -3.97961
H   -3.67943   2.91251  -3.14550
C   -6.59604   1.29076  -2.04462
H   -6.91308   2.08077  -1.35014
H   -6.75956   0.34087  -1.52130
C   -1.16950  -2.43583  -1.65968
C   -1.66776  -3.89423  -1.57830
H   -0.78185  -4.46309  -1.26889
C   -2.15545  -4.50323  -2.91642
C   -2.22565  -6.04240  -2.79881
H   -1.29098  -6.40776  -2.35553
H   -3.02364  -6.32062  -2.09727
C   -3.46383  -3.89655  -3.44745
H   -3.41967  -2.80626  -3.47000
H   -4.32179  -4.19006  -2.83200
H   -3.65479  -4.24570  -4.46702
C    2.23848  -0.76090  -2.08793
C    3.73441  -1.06931  -2.27942
H    4.21137  -0.10416  -2.06824
C    4.14358  -1.46935  -3.72065
C    5.67535  -1.41502  -3.86529
H    6.16276  -2.20312  -3.27869
H    6.07618  -0.45274  -3.53010
H    5.97195  -1.55189  -4.90940
C    3.55711  -2.81171  -4.20525
H    2.50102  -2.86423  -3.92734
H    4.05410  -3.64066  -3.68548
H   -4.81409   0.65108  -3.05616
H   -1.35897  -4.26060  -3.63059
H    3.71810  -0.67701  -4.34733
H    0.24411   4.51877  -3.56079
C   -7.49381   1.32733  -3.29026
H   -8.53611   1.12558  -3.01820
H   -7.46981   2.30066  -3.79086
H   -7.18895   0.56785  -4.02051
C    1.15570   7.07629  -4.16792
H    0.21330   6.83801  -4.67609
H    1.14639   8.14782  -3.93830
H    1.97113   6.90174  -4.87718
C    3.67591  -3.02069  -5.72278
H    3.19133  -3.95774  -6.01973
H    3.18628  -2.20714  -6.27158
H    4.71709  -3.07242  -6.05911
C   -2.45202  -6.76658  -4.13397
H   -3.43145  -6.54093  -4.56777
H   -1.68790  -6.48887  -4.87025
H   -2.39875  -7.85225  -3.99486
C    0.80285  -2.30845   1.92154
C    0.56911  -1.06781   2.44163
H    1.03962  -3.15242   2.56332
H    0.75728  -2.47069   0.85398
C    0.28246   0.03187   1.56155
O    0.56689  -0.81942   3.78824
Si   1.74218  -1.10398   4.99450
C    3.35563  -0.31042   4.45422
H    4.13502  -0.45304   5.21251
H    3.71992  -0.76447   3.52510
H    3.24428   0.76184   4.26635
C    1.99081  -2.96146   5.21779
H    2.54784  -3.16651   6.14022
H    1.03959  -3.50149   5.28136
H    2.57354  -3.39399   4.39613
C    0.97834  -0.31137   6.54939
C    0.63456   1.17116   6.28021
C   -0.31359  -1.06370   6.94497
C    1.99191  -0.39136   7.71571
H    1.51702   1.75499   5.99342
H   -0.10998   1.27071   5.48377
H    0.21664   1.63196   7.18653
H   -0.11885  -2.11319   7.19543
H   -0.76727  -0.59681   7.83069
H   -1.05885  -1.04119   6.14201
H    1.55711   0.04930   8.62357
H    2.26602  -1.42485   7.96016
H    2.91521   0.15898   7.49924
C    0.39540   1.37624   2.18430
O    1.50966   1.85181   2.34549
O   -0.75910   1.97893   2.46638
C   -0.64754   3.33444   2.97561
H   -0.20577   3.98206   2.21551
H   -1.66899   3.63949   3.19768
H   -0.03411   3.35022   3.87906
169
M1a-II Rh2SiC67N4H76O19
Rh  -0.85294  -1.06757  -0.45164
Rh   0.56189   0.81654   0.29191
N    1.00623  -3.61611   3.14516
O    2.58981  -3.19473   1.48323
O   -0.57385  -4.70836   4.47413
C    1.90800  -3.97695   2.12586
C    1.83434  -5.46085   2.01073
C    2.51600  -6.32768   1.16394
H    3.22748  -5.95694   0.43053
C    2.22568  -7.69706   1.28145
H    2.73532  -8.40972   0.63710
C    1.28271  -8.16310   2.21143
H    1.07956  -9.22968   2.27551
C    0.59157  -7.27425   3.05137
H   -0.14930  -7.62689   3.76470
C    0.88737  -5.92167   2.92908
C    0.31466  -4.74050   3.63950
N   -4.38345   0.59232   2.27983
O   -2.84798  -0.55813   3.61777
O   -6.29606   1.08581   1.03124
C   -3.96311  -0.44301   3.14015
C   -5.14665  -1.33371   3.32186
C   -5.29292  -2.48415   4.08829
H   -4.47006  -2.87257   4.68344
C   -6.54181  -3.12562   4.05540
H   -6.69654  -4.02958   4.63997
C   -7.59520  -2.62188   3.27559
H   -8.54990  -3.14282   3.26943
C   -7.43310  -1.46119   2.50183
H   -8.24242  -1.06874   1.89104
C   -6.19318  -0.83384   2.54401
C   -5.70405   0.38596   1.83761
N   -2.65234   1.82444  -3.75781
O   -3.42493   2.30275  -1.60624
O   -2.56632   1.04159  -5.95672
C   -3.63049   1.93695  -2.75100
C   -4.91839   1.51861  -3.37424
C   -6.19511   1.45021  -2.82814
H   -6.38024   1.72025  -1.79121
C   -7.22812   1.00269  -3.66810
H   -8.24193   0.93290  -3.28058
C   -6.97418   0.63715  -4.99986
H   -7.79591   0.29273  -5.62364
C   -5.67726   0.70179  -5.53542
H   -5.47190   0.41088  -6.56271
C   -4.66262   1.14801  -4.69647
C   -3.19931   1.30442  -4.94791
N    2.83372  -2.89252  -2.89163
O    1.79142  -1.34033  -4.29887
O    3.52179  -4.91890  -1.95469
C    2.11495  -2.48398  -4.03584
C    1.85541  -3.72596  -4.82218
C    1.20955  -3.89493  -6.04147
H    0.79489  -3.04657  -6.58044
C    1.11024  -5.20308  -6.54241
H    0.61062  -5.37780  -7.49250
C    1.64291  -6.29262  -5.83472
H    1.54829  -7.29405  -6.24827
C    2.29106  -6.10898  -4.60264
H    2.70225  -6.94835  -4.04732
C    2.38388  -4.80930  -4.11736
C    2.98989  -4.29063  -2.85695
O   -0.31149  -2.05922   1.29671
O    0.89425  -0.28866   2.04818
O   -2.42929  -0.17335   0.56677
O   -1.17199   1.63115   1.13604
O   -1.33127   0.06599  -2.13067
O    0.06595   1.74546  -1.51105
O    0.83225  -1.85232  -1.39939
O    2.16309  -0.18438  -0.62482
C    0.40664  -1.46272   2.15000
C    0.62962  -2.23452   3.46976
H   -0.37985  -2.31164   3.89151
C    1.52410  -1.54272   4.52842
C    1.17009  -2.06143   5.94075
H    1.42284  -3.12719   6.01609
H    0.08334  -1.99836   6.07525
C    3.02894  -1.64860   4.23560
H    3.25962  -1.36849   3.20685
H    3.39440  -2.67059   4.39222
H    3.59566  -0.99128   4.90217
C   -2.25485   0.95896   1.10422
C   -3.51134   1.62080   1.70266
H   -4.05057   1.97397   0.81540
C   -3.26401   2.85540   2.60459
C   -2.53448   2.54906   3.92209
H   -3.16950   1.98363   4.61261
H   -2.24937   3.47997   4.42292
H   -1.62406   1.97212   3.74941
C   -4.59143   3.61427   2.82830
H   -5.26150   3.00307   3.44767
H   -5.09736   3.73666   1.86286
C   -0.80171   1.20706  -2.27264
C   -1.20790   1.98071  -3.54572
H   -0.74798   1.40858  -4.36130
C   -0.68399   3.43477  -3.64757
C   -0.75159   3.91590  -5.11444
H   -0.30282   3.15064  -5.75987
H   -1.80128   3.99724  -5.42701
C   -1.36416   4.41541  -2.67980
H   -1.35718   4.03444  -1.65775
H   -2.40401   4.60755  -2.96927
H   -0.83504   5.37287  -2.68015
C    1.94823  -1.28133  -1.24418
C    3.18967  -2.03693  -1.75698
H    3.39681  -2.74158  -0.94120
C    4.47420  -1.18883  -1.94669
C    5.68511  -2.11833  -2.14882
H    5.63355  -2.63752  -3.11318
H    5.74248  -2.87932  -1.36338
H    6.62042  -1.55117  -2.13018
C    4.37822  -0.10359  -3.03849
H    3.43298   0.43466  -2.92717
H    4.34622  -0.57612  -4.02727
H   -2.61085   3.49758   2.00217
H    0.37344   3.36790  -3.36521
H    4.60159  -0.67683  -0.98509
H    1.24191  -0.48413   4.48389
C   -4.42967   4.99647   3.47755
H   -5.39612   5.51000   3.53310
H   -4.03498   4.93351   4.49680
H   -3.75261   5.63274   2.89389
C    1.85181  -1.29507   7.08343
H    1.64472  -0.21973   7.01907
H    1.48217  -1.64559   8.05362
H    2.93877  -1.42710   7.08246
C    5.53172   0.91023  -3.00070
H    5.37139   1.70065  -3.74243
H    5.60436   1.39159  -2.01726
H    6.50198   0.45127  -3.21882
C   -0.04264   5.25350  -5.37245
H   -0.52820   6.08689  -4.85452
H    1.00268   5.21851  -5.04197
H   -0.04466   5.48828  -6.44295
C    3.66831   1.18102   1.70406
C    3.07473   2.37968   1.42609
H    4.62757   1.14040   2.21356
H    3.17837   0.25522   1.43912
C    1.72945   2.40166   0.92725
O    3.67292   3.56869   1.75279
Si   5.03753   4.33089   1.06021
C    4.67138   4.70770  -0.74195
H    5.52902   5.19482  -1.22153
H    4.46797   3.78559  -1.29873
H    3.79517   5.35227  -0.85899
C    6.51999   3.17111   1.17102
H    7.42312   3.66788   0.79596
H    6.72439   2.84614   2.19714
H    6.37478   2.27524   0.55586
C    5.26052   5.88816   2.13331
C    3.96779   6.73581   2.11371
C    5.57657   5.48781   3.59311
C    6.42925   6.73292   1.57251
H    3.70072   7.05942   1.10101
H    3.11833   6.18101   2.52620
H    4.10104   7.64125   2.72246
H    6.51453   4.92573   3.67296
H    5.68281   6.38627   4.21726
H    4.77834   4.87638   4.02864
H    6.57490   7.63115   2.18847
H    7.37839   6.18326   1.57560
H    6.24016   7.07124   0.54686
C    1.13955   3.76038   0.82436
O    1.28228   4.40651  -0.20116
O    0.46574   4.15128   1.90963
C   -0.16421   5.45358   1.82416
H   -0.88835   5.46824   1.00675
H   -0.66117   5.59448   2.78345
H    0.58878   6.22862   1.66305
169
TS2 Rh2SiC67N4H76O19
Rh   0.26052   0.14120  -0.37978
Rh   0.75157   0.56379  -2.74689
N   -3.53317   3.09000  -0.76493
O   -1.65526   4.46164  -0.50961
O   -5.52280   1.95371  -0.30328
C   -2.74334   4.06852  -0.12963
C   -3.51438   4.50024   1.07497
C   -3.22609   5.47602   2.02226
H   -2.31889   6.07226   1.95727
C   -4.15516   5.66439   3.05874
H   -3.96742   6.42037   3.81784
C   -5.32617   4.89295   3.13029
H   -6.02674   5.06210   3.94484
C   -5.60678   3.91167   2.16553
H   -6.51296   3.31268   2.21257
C   -4.68100   3.73695   1.14315
C   -4.69147   2.80295  -0.02162
N   -2.92493  -3.10934  -1.90693
O   -3.60499  -0.92023  -2.34660
O   -2.78340  -5.23350  -0.94431
C   -3.78098  -1.99603  -1.80238
C   -4.90056  -2.41486  -0.91066
C   -6.01698  -1.70530  -0.48295
H   -6.17531  -0.67121  -0.77891
C   -6.91746  -2.37661   0.36077
H   -7.80482  -1.85877   0.71751
C   -6.69114  -3.70523   0.75497
H   -7.41030  -4.19785   1.40557
C   -5.55032  -4.40470   0.32719
H   -5.36400  -5.43064   0.63542
C   -4.66596  -3.73156  -0.50805
C   -3.37175  -4.17670  -1.10572
N    4.11122  -2.73107  -0.15106
O    2.28945  -3.99592  -0.90083
O    5.80965  -1.89351   1.21943
C    3.16938  -3.77489  -0.08683
C    3.46937  -4.52545   1.16985
C    2.86834  -5.66118   1.70090
H    2.04392  -6.15269   1.18966
C    3.37182  -6.14767   2.91873
H    2.93165  -7.03616   3.36574
C    4.43856  -5.50677   3.56930
H    4.80637  -5.90746   4.51111
C    5.03697  -4.36004   3.02208
H    5.86280  -3.85817   3.52022
C    4.53113  -3.88976   1.81558
C    4.93930  -2.71666   0.98782
N    3.53633   3.45632   0.64215
O    4.53186   1.53846  -0.24182
O    2.78081   5.04728   2.17531
C    4.37550   2.32438   0.67665
C    4.99139   2.30565   2.03387
C    5.90499   1.41764   2.58939
H    6.27724   0.56571   2.02622
C    6.30667   1.65769   3.91378
H    7.02067   0.98736   4.38686
C    5.79789   2.74488   4.64199
H    6.12855   2.90192   5.66622
C    4.86377   3.62546   4.07231
H    4.45657   4.46254   4.63408
C    4.47626   3.38146   2.76013
C    3.49948   4.10097   1.89234
O   -1.45972   1.30277  -0.64009
O   -1.06793   1.57224  -2.86104
O   -0.82459  -1.53995  -1.00306
O   -0.24433  -1.22516  -3.17571
O    2.01488  -0.99889  -0.32521
O    2.53932  -0.48237  -2.47215
O    1.38547   1.83708   0.05652
O    1.70795   2.32072  -2.13835
C   -1.76033   1.70981  -1.80855
C   -3.15922   2.33514  -1.96554
H   -3.81920   1.46002  -1.95589
C   -3.40806   3.07121  -3.30728
C   -4.92106   3.31580  -3.50197
H   -5.27235   4.05230  -2.76632
H   -5.46116   2.38617  -3.28456
C   -2.57886   4.35137  -3.50050
H   -1.52109   4.17795  -3.29250
H   -2.92390   5.16024  -2.84707
H   -2.66286   4.70276  -4.53390
C   -0.84483  -1.83412  -2.24467
C   -1.63219  -3.11343  -2.60455
H   -1.06600  -3.92374  -2.12915
C   -1.71342  -3.43113  -4.11932
C   -2.60812  -2.46742  -4.91596
H   -3.66806  -2.61519  -4.67818
H   -2.48585  -2.63884  -5.98995
H   -2.35527  -1.42563  -4.71187
C   -2.10819  -4.90989  -4.33192
H   -3.14238  -5.06701  -3.99735
H   -1.48278  -5.54064  -3.68817
C    2.77333  -1.01923  -1.34925
C    4.15616  -1.67243  -1.16623
H    4.74455  -0.87199  -0.70134
C    4.87724  -2.05798  -2.48371
C    6.36668  -2.35906  -2.20593
H    6.77835  -1.56027  -1.57718
H    6.45224  -3.28406  -1.61941
C    4.18973  -3.17989  -3.27838
H    3.12459  -2.97939  -3.41422
H    4.28974  -4.15026  -2.77988
H    4.64018  -3.27011  -4.27196
C    1.85821   2.53377  -0.90022
C    2.62658   3.79693  -0.45935
H    1.85970   4.42781   0.00628
C    3.26328   4.62500  -1.60362
C    3.62985   6.02957  -1.08945
H    4.44070   5.98731  -0.35258
H    2.77370   6.52002  -0.61403
H    3.96395   6.67014  -1.91102
C    4.44934   3.93651  -2.31070
H    4.19800   2.89013  -2.49709
H    5.32075   3.93308  -1.64273
H   -0.68440  -3.30806  -4.47839
H    4.83141  -1.14464  -3.08795
H    2.45660   4.73465  -2.33893
H   -3.08929   2.34933  -4.06824
C   -1.96809  -5.39613  -5.78197
H   -2.17257  -6.47078  -5.84740
H   -2.66392  -4.88984  -6.45868
H   -0.95216  -5.22841  -6.15998
C   -5.30594   3.79017  -4.91114
H   -4.94700   3.09088  -5.67613
H   -6.39540   3.85798  -5.00952
H   -4.89530   4.77820  -5.14297
C    4.83607   4.59591  -3.64353
H    5.64355   4.03506  -4.12787
H    3.98511   4.61270  -4.33529
H    5.18600   5.62639  -3.51815
C    7.22895  -2.48458  -3.47074
H    6.94365  -3.34570  -4.08367
H    7.14780  -1.58715  -4.09605
H    8.28487  -2.60842  -3.20475
C    0.08903  -2.13817   2.02173
C   -0.89621  -1.20764   2.34459
H    0.39421  -2.32394   1.00163
H    0.55857  -2.72685   2.81196
C   -0.19298  -0.18537   1.72398
O   -1.71350  -1.13886   3.37936
Si  -2.33113  -2.37371   4.43164
C   -0.94649  -2.85347   5.60920
H   -1.33317  -3.46163   6.43566
H   -0.17572  -3.44942   5.10742
H   -0.45864  -1.97397   6.04276
C   -2.86514  -3.83056   3.37634
H   -3.27927  -4.62581   4.00782
H   -3.63107  -3.55086   2.64588
H   -2.02430  -4.26399   2.82390
C   -3.77004  -1.48829   5.30005
C   -3.23564  -0.28139   6.10646
C   -4.79220  -0.98675   4.25361
C   -4.46916  -2.47696   6.26383
H   -2.53307  -0.58660   6.89075
H   -2.72918   0.44572   5.46237
H   -4.06861   0.23807   6.60013
H   -5.22791  -1.80808   3.67282
H   -5.62074  -0.47056   4.75828
H   -4.34198  -0.27942   3.54924
H   -5.30158  -1.97543   6.77596
H   -4.88913  -3.34266   5.73770
H   -3.79234  -2.85107   7.04154
C    0.23938   0.92688   2.62693
O    1.26809   0.89665   3.27840
O   -0.64083   1.93779   2.60207
C   -0.27601   3.11090   3.37077
H    0.61853   3.57342   2.94979
H   -1.12978   3.78216   3.28515
H   -0.09982   2.84105   4.41485
35
M2  SiC11H20O3
C   -1.53528  -2.09343  -0.08569
C   -0.96439  -0.70172  -0.06166
H   -1.50342  -2.71196   0.81876
H   -1.51722  -2.67197  -1.01736
C   -2.27494  -0.74756  -0.05490
O    0.13317   0.02632  -0.03761
Si   1.74865  -0.59961   0.03762
C    1.99509  -1.72949  -1.44596
H    3.02882  -2.09480  -1.49334
H    1.34211  -2.60384  -1.38647
H    1.78208  -1.21895  -2.39145
C    1.90666  -1.55817   1.64471
H    2.93467  -1.92751   1.78324
H    1.65012  -0.94411   2.51485
H    1.24436  -2.43464   1.64101
C    2.80823   0.97648  -0.01938
C    2.54213   1.74640  -1.33380
C    2.46697   1.89035   1.18309
C    4.30495   0.58588   0.04320
H    2.80418   1.15653  -2.22060
H    1.48929   2.04180  -1.42654
H    3.14629   2.66381  -1.36211
H    2.67653   1.40476   2.14341
H    3.07119   2.80244   1.14253
H    1.41375   2.18843   1.17985
H    4.93023   1.48867   0.01422
H    4.55283   0.05451   0.97182
H    4.60996  -0.04746  -0.79902
C   -3.59008  -0.13437  -0.00059
O   -4.64961  -0.74552   0.07340
O   -3.50969   1.22318  -0.03802
C   -4.77503   1.91777   0.01412
H   -5.30710   1.68750   0.94552
H   -4.52437   2.97851  -0.02964
H   -5.40208   1.63800  -0.83641
57
TS3-exo-a SiC23N3H27O3
C    0.50099   0.49602  -1.85449
C    0.70469   0.25872  -0.40815
H    0.38718  -0.34459  -2.54385
H    0.94705   1.38477  -2.31064
C   -0.56255   0.67502  -0.75116
O    1.59931   0.47188   0.53737
Si   3.22941   1.06094   0.47421
C    3.58843   1.30817   2.29632
H    4.62137   1.63436   2.46308
H    2.92538   2.07346   2.71518
H    3.43020   0.38362   2.86119
C    3.16173   2.70927  -0.43286
H    4.07588   3.28537  -0.24693
H    3.05883   2.59954  -1.51771
H    2.31876   3.31196  -0.07561
C    4.43361  -0.16474  -0.35468
C    4.64352  -1.41350   0.53186
C    3.93642  -0.60570  -1.74982
C    5.79184   0.56503  -0.51864
H    5.07529  -1.15605   1.50575
H    3.71202  -1.95647   0.71775
H    5.33910  -2.10777   0.04009
H    3.76370   0.24577  -2.41908
H    4.69055  -1.24508  -2.22932
H    3.00984  -1.18516  -1.69690
H    6.53237  -0.12361  -0.94793
H    5.72237   1.42742  -1.19151
H    6.19756   0.91545   0.43859
C   -1.26830   1.91070  -0.39763
O   -1.45960   2.83872  -1.17086
O   -1.68972   1.90342   0.88870
C   -2.41672   3.07608   1.31574
H   -3.31537   3.21015   0.70865
H   -2.68205   2.88882   2.35664
H   -1.78804   3.96662   1.23550
C   -5.35128   0.44739  -1.37872
C   -4.05239   0.00519  -1.58531
C   -3.31687  -0.55725  -0.51925
C   -3.91255  -0.67303   0.76580
C   -5.23586  -0.21627   0.95549
C   -5.94414   0.33749  -0.10200
H   -1.62392  -1.19846  -1.71929
H   -5.91439   0.88085  -2.20163
H   -3.59138   0.09683  -2.56665
C   -1.94797  -0.97548  -0.70809
C   -3.13853  -1.28790   1.80711
H   -5.69539  -0.30752   1.93769
H   -6.96301   0.68627   0.05058
C   -1.90321  -1.78787   1.54908
H   -3.54345  -1.38839   2.80996
H   -1.30534  -2.28885   2.30090
N   -1.34173  -1.72161   0.27820
C   -0.00538  -2.13028   0.04532
C    0.79597  -2.50954   1.14924
N    1.47759  -2.78373   2.06011
C    0.31034  -2.67569  -1.22638
N    0.56877  -3.06690  -2.29945
57
TS3-endo-b SiC23N3H27O3
C    0.58278  -0.31150  -1.73690
C    0.12324  -0.30729  -0.29786
H    1.12199   0.55245  -2.12599
H    0.01914  -0.85444  -2.50124
C    1.16982  -1.13318  -0.61275
O   -1.05080  -0.35135   0.36585
Si  -2.35139  -1.46227   0.38452
C   -2.84794  -1.53575   2.19467
H   -3.72140  -2.17992   2.34878
H   -2.02651  -1.94195   2.79597
H   -3.09139  -0.54423   2.59157
C   -1.77083  -3.14902  -0.20703
H   -2.60395  -3.86167  -0.17838
H   -1.38031  -3.14505  -1.23015
H   -0.98719  -3.53857   0.45090
C   -3.74211  -0.75114  -0.71412
C   -4.21483   0.61181  -0.15840
C   -3.23812  -0.55399  -2.16169
C   -4.93681  -1.73505  -0.72423
H   -4.63822   0.52039   0.84886
H   -3.39832   1.34097  -0.11626
H   -4.99991   1.03147  -0.80330
H   -2.89516  -1.49265  -2.61344
H   -4.04845  -0.16747  -2.79571
H   -2.41411   0.16628  -2.21079
H   -5.75658  -1.32607  -1.33112
H   -4.67010  -2.70699  -1.15557
H   -5.33819  -1.91198   0.28106
C    1.60716  -2.52293  -0.52545
O    1.88147  -3.21737  -1.49396
O    1.66230  -2.95603   0.75663
C    2.16279  -4.29785   0.94455
H    3.16468  -4.39359   0.51874
H    2.19088  -4.44639   2.02415
H    1.49751  -5.02477   0.47087
C   -1.76112   3.75921   1.30740
C   -0.94703   2.63959   1.41686
C    0.20309   2.51788   0.60824
C    0.53510   3.56013  -0.30053
C   -0.30863   4.68744  -0.40194
C   -1.44570   4.78290   0.38945
H    0.98423   0.73567   1.57520
H   -2.64579   3.84900   1.93330
H   -1.18952   1.84852   2.12086
C    1.03549   1.33789   0.67410
C    1.76298   3.43558  -1.03803
H   -0.05309   5.48410  -1.09765
H   -2.09094   5.65479   0.31016
C    2.59047   2.37808  -0.84554
H    2.06376   4.20782  -1.74046
H    3.54100   2.27403  -1.35534
N    2.27835   1.36621   0.06338
C    3.08048   0.22612   0.19779
C    4.13880   0.01345  -0.72706
N    4.99493  -0.18039  -1.49907
C    3.22319  -0.34426   1.49647
N    3.34502  -0.80133   2.56501
57
P1-exo-a SiC23N3H27O3
C    0.35698   0.17388  -1.84166
C    0.55266  -0.28317  -0.42502
H    0.20053  -0.55538  -2.63396
H    0.90605   1.06054  -2.13991
C   -0.76065   0.38421  -0.83479
O    1.44763   0.28076   0.44500
Si   2.96180   1.07905   0.32329
C    3.16368   1.72676   2.07268
H    4.14026   2.20344   2.21609
H    2.39417   2.47592   2.29140
H    3.06662   0.92443   2.81141
C    2.85925   2.51487  -0.89225
H    3.66035   3.23060  -0.66968
H    2.98229   2.21290  -1.93820
H    1.90705   3.04791  -0.80444
C    4.37003  -0.11738  -0.17083
C    4.65147  -1.14285   0.95069
C    4.03367  -0.86844  -1.47881
C    5.64931   0.72681  -0.40056
H    4.96300  -0.65432   1.88101
H    3.78005  -1.76368   1.17957
H    5.46536  -1.81711   0.64883
H    3.82096  -0.18499  -2.30984
H    4.88372  -1.49366  -1.78565
H    3.17358  -1.53698  -1.36669
H    6.49220   0.06679  -0.64825
H    5.53749   1.43540  -1.22890
H    5.93878   1.29538   0.49180
C   -1.02213   1.77302  -0.33207
O   -0.61725   2.79021  -0.86969
O   -1.72363   1.75406   0.81212
C   -2.05964   3.04227   1.37590
H   -2.65254   3.62238   0.66492
H   -2.64072   2.82150   2.27097
H   -1.15086   3.59267   1.63080
C   -5.29971   0.81627  -1.26607
C   -3.98142   0.40922  -1.50095
C   -3.28312  -0.33350  -0.54542
C   -3.91124  -0.69984   0.66285
C   -5.23773  -0.28768   0.88812
C   -5.92632   0.46731  -0.06323
H   -1.82557  -1.17472  -1.83442
H   -5.83320   1.39290  -2.01803
H   -3.49589   0.67679  -2.43887
C   -1.84759  -0.73369  -0.82896
C   -3.17542  -1.50545   1.62807
H   -5.72864  -0.56880   1.81828
H   -6.95192   0.77620   0.12746
C   -1.94316  -1.97203   1.34092
H   -3.62875  -1.76456   2.57990
H   -1.39334  -2.59642   2.03710
N   -1.32884  -1.76422   0.10335
C    0.13163  -1.78024  -0.04389
C    0.82980  -2.22015   1.17910
N    1.37612  -2.60333   2.12879
C    0.50379  -2.72472  -1.13660
N    0.77342  -3.43602  -2.01521
57
P1-endo-b SiC23N3H27O3
C   -0.58115  -0.12724   1.36448
C   -0.22726  -0.01253  -0.07707
H   -0.75512   0.77031   1.95201
H   -0.17707  -0.96943   1.91305
C   -1.63083  -0.55413   0.33055
O    0.69532  -0.75821  -0.74519
Si   2.06443  -1.76268  -0.65795
C    3.15702  -1.11183  -2.04896
H    3.93661  -1.83843  -2.30572
H    2.55605  -0.94449  -2.95050
H    3.65376  -0.16894  -1.79619
C    1.50882  -3.50197  -1.09679
H    2.36210  -4.19086  -1.12690
H    0.77471  -3.88912  -0.38535
H    1.04732  -3.50801  -2.09158
C    3.00017  -1.71338   1.01563
C    3.11146  -0.27250   1.56337
C    2.34378  -2.62944   2.07414
C    4.43326  -2.24688   0.75232
H    3.56756   0.41252   0.83934
H    2.13838   0.14569   1.83864
H    3.73968  -0.25908   2.46536
H    2.33748  -3.67764   1.75569
H    2.90516  -2.57651   3.01764
H    1.30763  -2.35628   2.29498
H    4.98972  -2.29742   1.69855
H    4.43154  -3.25813   0.32685
H    4.99982  -1.59861   0.07538
C   -1.96779  -2.00316   0.29179
O   -1.22358  -2.88594   0.68221
O   -3.20052  -2.21725  -0.20510
C   -3.62893  -3.59793  -0.28970
H   -3.64276  -4.04786   0.70553
H   -4.63263  -3.56048  -0.71196
H   -2.95592  -4.16040  -0.94039
C    2.76017   3.28471  -1.04896
C    1.74463   2.33862  -1.23243
C    0.53873   2.43844  -0.53410
C    0.32160   3.52840   0.33775
C    1.35032   4.47076   0.51938
C    2.56390   4.34790  -0.16030
H   -0.62103   1.15795  -1.80248
H    3.69162   3.19645  -1.60347
H    1.88934   1.52106  -1.93316
C   -0.52093   1.36759  -0.72843
C   -0.97998   3.67623   0.97896
H    1.18497   5.31220   1.18996
H    3.34720   5.08797  -0.01110
C   -1.98188   2.81682   0.70472
H   -1.16922   4.51477   1.64208
H   -2.97087   2.93659   1.13491
N   -1.84580   1.76167  -0.20105
C   -2.65185   0.53621  -0.07385
C   -3.74271   0.65193   0.92013
N   -4.58783   0.70590   1.71483
C   -3.26496   0.25862  -1.41008
N   -3.70084   0.12436  -2.47814
57
TS3-endo-a SiC23N3H27O3
C    0.01858  -0.15580  -1.68005
C    0.56090   0.66087  -0.49996
H    0.54685  -1.06622  -1.96567
H   -0.43371   0.37780  -2.52111
C   -0.61351  -0.04080  -0.34165
O   -1.80184   0.15547   0.19137
Si  -3.35735  -0.49477  -0.21073
C   -3.78269  -1.70989   1.15244
H   -4.83769  -2.00415   1.09708
H   -3.18469  -2.62304   1.06416
H   -3.60058  -1.28475   2.14455
C   -3.27185  -1.35040  -1.87959
H   -4.25019  -1.78412  -2.12056
H   -3.00002  -0.67261  -2.69523
H   -2.55020  -2.17392  -1.86352
C   -4.48437   1.04047  -0.20950
C   -4.48598   1.69325   1.19254
C   -3.98301   2.07076  -1.24731
C   -5.92627   0.61327  -0.57440
H   -4.87740   1.01667   1.96089
H   -3.48100   2.00325   1.49948
H   -5.12367   2.58842   1.19047
H   -3.98725   1.66763  -2.26701
H   -4.63468   2.95559  -1.24655
H   -2.96643   2.41358  -1.02407
H   -6.59097   1.48813  -0.56790
H   -5.98654   0.16930  -1.57528
H   -6.33888  -0.10943   0.13974
C    0.81344   2.09896  -0.43946
O    1.00766   2.81595  -1.41021
O    0.81045   2.55572   0.84160
C    1.00441   3.97878   0.99668
H    0.20392   4.52919   0.49593
H    0.97629   4.16014   2.07168
H    1.96709   4.28427   0.57839
C    5.29942   1.58391   0.37356
C    4.02223   1.21311   0.76848
C    3.46147   0.00056   0.30966
C    4.22048  -0.84935  -0.54073
C    5.51708  -0.45140  -0.93470
C    6.04650   0.75115  -0.48721
H    1.65996   0.10645   1.52709
H    5.72816   2.51798   0.72843
H    3.44345   1.85059   1.43225
C    2.11708  -0.37518   0.67044
C    3.63884  -2.10827  -0.91731
H    6.09886  -1.10019  -1.58626
H    7.04572   1.05147  -0.79420
C    2.42370  -2.48012  -0.44069
H    4.18015  -2.79602  -1.56054
H    1.97182  -3.43846  -0.66809
N    1.68792  -1.65298   0.40531
C    0.35767  -1.97391   0.78386
C   -0.26521  -3.09727   0.18330
N   -0.81026  -3.98878  -0.34459
C   -0.06461  -1.61080   2.09368
N   -0.42787  -1.27671   3.15381
57
TS3-exo-b SiC23N3H27O3
C    1.01925  -0.86272   2.16122
C    1.66323  -0.97099   0.79855
H    1.35857  -0.10087   2.86762
H    0.72149  -1.79757   2.64485
C    0.40599  -0.43185   0.84153
O   -0.75088  -0.63429   0.17436
Si  -2.09674  -1.56210   0.68088
C   -2.82311  -0.79231   2.23677
H   -3.65747  -1.39278   2.61869
H   -2.07178  -0.73917   3.03308
H   -3.19207   0.22308   2.05835
C   -1.51616  -3.31733   1.04106
H   -2.37245  -3.98550   1.19288
H   -0.91834  -3.72735   0.21988
H   -0.90729  -3.36812   1.95014
C   -3.28331  -1.50221  -0.80715
C   -3.67502  -0.04278  -1.12799
C   -2.60411  -2.12775  -2.04763
C   -4.56274  -2.30468  -0.46893
H   -4.19166   0.44018  -0.29045
H   -2.80205   0.56798  -1.37763
H   -4.35733  -0.01679  -1.98965
H   -2.34588  -3.18128  -1.88861
H   -3.28314  -2.08637  -2.91104
H   -1.68684  -1.59449  -2.32010
H   -5.25812  -2.27866  -1.31930
H   -4.35024  -3.35976  -0.25949
H   -5.09531  -1.89077   0.39588
C    2.31804  -2.08283   0.11464
O    2.81288  -3.04716   0.68104
O    2.28817  -1.92989  -1.23169
C    2.95640  -2.96058  -1.99218
H    2.48130  -3.93010  -1.82130
H    2.85484  -2.66186  -3.03578
H    4.01104  -3.01547  -1.71293
C   -2.51423   3.41147   0.98123
C   -1.35331   2.73956   1.33593
C   -0.39301   2.41442   0.35309
C   -0.62342   2.78070  -1.00025
C   -1.81450   3.45861  -1.34297
C   -2.74736   3.77036  -0.36435
H    1.12565   1.71633   1.73604
H   -3.24715   3.66690   1.74295
H   -1.17311   2.46599   2.37356
C    0.80830   1.69791   0.69886
C    0.40703   2.47765  -1.95297
H   -1.98863   3.74030  -2.37948
H   -3.66090   4.29615  -0.63199
C    1.58803   1.93571  -1.56003
H    0.26960   2.71196  -3.00491
H    2.39933   1.73434  -2.24889
N    1.84141   1.64547  -0.22149
C    3.01554   0.99601   0.16886
C    3.98335   0.65120  -0.81361
N    4.78353   0.34765  -1.60942
C    3.49303   1.20165   1.49599
N    3.86129   1.36237   2.59342
57
P1-endo-a SiC23N3H27O3
C    0.24419   0.10060  -1.48575
C    0.74023   0.67738  -0.16812
H    0.92029  -0.53842  -2.04725
H   -0.37734   0.77156  -2.06909
C   -0.37476  -0.38832  -0.21153
O   -1.65823  -0.11535   0.16373
Si  -3.17187  -0.57946  -0.49804
C   -3.69994  -2.16240   0.37098
H   -4.70793  -2.45994   0.05821
H   -3.03173  -2.99610   0.12935
H   -3.70816  -2.04614   1.46010
C   -2.99039  -0.89391  -2.34491
H   -3.95166  -1.21924  -2.76142
H   -2.67594  -0.00463  -2.90057
H   -2.26936  -1.69384  -2.54754
C   -4.33920   0.87213  -0.10024
C   -4.26144   1.21520   1.40571
C   -3.95015   2.12006  -0.92603
C   -5.79103   0.46710  -0.45242
H   -4.55177   0.36831   2.03878
H   -3.25234   1.52231   1.69956
H   -4.94420   2.04468   1.63816
H   -4.05601   1.94592  -2.00359
H   -4.61137   2.95992  -0.66896
H   -2.92041   2.43832  -0.73466
H   -6.47231   1.30664  -0.25632
H   -5.90438   0.20267  -1.51119
H   -6.14290  -0.38135   0.14569
C    0.34829   2.07660   0.18426
O   -0.41688   2.76313  -0.46922
O    0.93366   2.48502   1.32868
C    0.59896   3.82279   1.76741
H   -0.47330   3.89888   1.96162
H    1.16838   3.97589   2.68402
H    0.88571   4.55368   1.00766
C    4.95297   1.75401  -1.26457
C    3.64577   1.49921  -0.82784
C    3.33765   0.30788  -0.17088
C    4.34562  -0.66538   0.04175
C    5.65489  -0.39345  -0.39197
C    5.95889   0.80892  -1.03584
H    2.01158   0.29697   1.51169
H    5.18260   2.68802  -1.77217
H    2.87405   2.24570  -1.00019
C    1.97472   0.02727   0.44273
C    3.97883  -1.95077   0.63742
H    6.43327  -1.13814  -0.23521
H    6.97674   1.00475  -1.36618
C    2.67844  -2.31099   0.71389
H    4.74931  -2.66021   0.92323
H    2.35304  -3.29766   1.03311
N    1.68903  -1.41442   0.30662
C    0.27109  -1.67361   0.40832
C   -0.09663  -2.89480  -0.35015
N   -0.38329  -3.83347  -0.97177
C   -0.19802  -1.82438   1.82312
N   -0.46858  -1.93573   2.94775
57
P1-exo-b SiC23N3H27O3
C    1.13885  -0.79155   2.02352
C    1.83066  -0.76425   0.66891
H    1.56379  -0.21044   2.83855
H    0.77396  -1.77397   2.30503
C    0.46396  -0.07722   0.88748
O   -0.66239  -0.54980   0.25773
Si  -2.08219  -1.28860   0.84865
C   -2.87884  -0.20432   2.16636
H   -3.73093  -0.72562   2.61986
H   -2.17130   0.01287   2.97602
H   -3.23644   0.75027   1.76959
C   -1.69465  -2.96565   1.61798
H   -2.61115  -3.56330   1.69703
H   -0.96686  -3.53698   1.03412
H   -1.29948  -2.86231   2.63523
C   -3.15726  -1.46591  -0.71506
C   -3.40065  -0.08322  -1.36058
C   -2.44635  -2.38287  -1.73737
C   -4.52071  -2.09093  -0.33492
H   -3.93811   0.59676  -0.68958
H   -2.46335   0.40475  -1.64451
H   -4.01043  -0.19388  -2.26880
H   -2.26882  -3.38799  -1.33676
H   -3.06446  -2.49491  -2.63955
H   -1.48123  -1.96713  -2.04750
H   -5.15087  -2.19123  -1.22963
H   -4.41528  -3.09287   0.09781
H   -5.07420  -1.47187   0.38148
C    1.84140  -2.03817  -0.12091
O    1.50217  -3.12057   0.32076
O    2.20933  -1.82420  -1.39566
C    2.27149  -2.99171  -2.24962
H    1.27744  -3.43259  -2.35220
H    2.63429  -2.62620  -3.20988
H    2.96091  -3.72828  -1.83127
C   -2.34173   3.63872   0.66814
C   -1.29090   2.84152   1.13614
C   -0.32079   2.35455   0.25769
C   -0.37488   2.69439  -1.11068
C   -1.43776   3.49049  -1.57379
C   -2.41787   3.95409  -0.69410
H    1.07194   1.80587   1.76897
H   -3.09008   4.01453   1.36203
H   -1.22787   2.60321   2.19662
C    0.78720   1.46322   0.76745
C    0.71285   2.26220  -1.97821
H   -1.48266   3.75641  -2.62844
H   -3.23213   4.57234  -1.06603
C    1.82668   1.70949  -1.45768
H    0.66665   2.45212  -3.04650
H    2.67714   1.44811  -2.07870
N    2.01177   1.54177  -0.07289
C    2.84182   0.40321   0.37633
C    3.93877   0.08181  -0.56362
N    4.86235  -0.11763  -1.23811
C    3.53783   0.80792   1.63603
N    4.06768   1.11365   2.62335
191
M3-S Rh2SiC79N7H83O19
Rh   0.02286   0.27853  -0.59755
Rh  -0.32320   0.76353  -3.01207
N    3.13465   3.92367  -0.59279
O    4.03898   2.13864  -1.79913
O    2.71633   5.43596   1.13826
C    4.07347   2.90706  -0.85354
C    5.07825   2.97695   0.24694
C    6.22421   2.22049   0.46272
H    6.50859   1.42170  -0.21785
C    6.98821   2.52363   1.60175
H    7.89336   1.95647   1.80675
C    6.60146   3.54504   2.48400
H    7.21523   3.75590   3.35692
C    5.43412   4.29332   2.25989
H    5.12461   5.08041   2.94319
C    4.68767   3.98705   1.12812
C    3.41116   4.57363   0.62274
N   -3.59901   3.42502   0.20031
O   -1.65878   4.56879  -0.42989
O   -5.37125   2.61778   1.48755
C   -2.56966   4.37665   0.35483
C   -2.83542   5.06073   1.65545
C   -2.15750   6.10425   2.27468
H   -1.28249   6.55801   1.81560
C   -2.64585   6.54304   3.51637
H   -2.14434   7.35833   4.03272
C   -3.77111   5.94433   4.10493
H   -4.12376   6.30505   5.06843
C   -4.44549   4.88850   3.47001
H   -5.31618   4.41921   3.92124
C   -3.95582   4.46638   2.23955
C   -4.43803   3.39167   1.32399
N   -3.58735  -3.01974  -1.40811
O   -4.34774  -0.84803  -1.82910
O   -3.38366  -5.14019  -0.44221
C   -4.49681  -1.94700  -1.32357
C   -5.62813  -2.42642  -0.47540
C   -6.80840  -1.78939  -0.11120
H   -7.03204  -0.78061  -0.44923
C   -7.69999  -2.50271   0.70608
H   -8.63781  -2.04177   1.00753
C   -7.40188  -3.80418   1.14068
H   -8.11371  -4.33146   1.77169
C   -6.20318  -4.43498   0.76987
H   -5.96623  -5.44362   1.09962
C   -5.33260  -3.72074  -0.04546
C   -4.00892  -4.10822  -0.61539
N    3.98010  -2.27361  -1.94649
O    2.15455  -3.63704  -2.47014
O    5.90590  -1.45589  -0.90301
C    3.21528  -3.45350  -1.89873
C    3.95687  -4.39047  -1.00157
C    3.66676  -5.69963  -0.63439
H    2.78105  -6.20584  -1.01018
C    4.56236  -6.33694   0.24026
H    4.37068  -7.36091   0.55237
C    5.70133  -5.67270   0.72210
H    6.37403  -6.19236   1.40042
C    5.98244  -4.34933   0.34466
H    6.86142  -3.82791   0.71561
C    5.09050  -3.72963  -0.52308
C    5.10374  -2.35368  -1.10325
O    1.14063   2.03446  -0.55309
O    0.64237   2.58704  -2.70254
O   -1.75030   1.37107  -0.25123
O   -2.11804   1.67089  -2.47626
O   -1.17668  -1.45685  -0.88839
O   -1.29029  -1.09532  -3.12465
O    1.77936  -0.73285  -1.19358
O    1.53378  -0.11714  -3.36662
C    1.17747   2.79290  -1.57460
C    1.89564   4.14123  -1.35146
H    1.23760   4.67668  -0.65721
C    2.05056   5.02728  -2.61253
C    2.38204   6.47944  -2.20158
H    3.38509   6.51560  -1.75517
H    1.68712   6.79133  -1.41213
C    3.03492   4.47707  -3.65715
H    2.82378   3.43243  -3.89206
H    4.07176   4.54521  -3.30792
H    2.96191   5.05192  -4.58589
C   -2.40696   1.80867  -1.25525
C   -3.74769   2.50517  -0.93406
H   -4.38378   1.69778  -0.55491
C   -4.47344   3.11440  -2.16214
C   -3.77273   4.34304  -2.76536
H   -3.86392   5.22012  -2.11389
H   -4.22645   4.60148  -3.72736
H   -2.71176   4.15406  -2.93650
C   -5.95480   3.39448  -1.82406
H   -6.02010   4.20648  -1.08715
H   -6.38116   2.50835  -1.33744
C   -1.55967  -1.74160  -2.08017
C   -2.36400  -3.05605  -2.23060
H   -1.74001  -3.82347  -1.76008
C   -2.60773  -3.48675  -3.70249
C   -2.90410  -5.00145  -3.78359
H   -2.16385  -5.54179  -3.18141
H   -3.88000  -5.21498  -3.32760
C   -3.67028  -2.64730  -4.43116
H   -3.48481  -1.57831  -4.31607
H   -4.67868  -2.86667  -4.05857
H   -3.66414  -2.87567  -5.50128
C    2.17395  -0.62598  -2.40294
C    3.62776  -1.05704  -2.68736
H    4.21627  -0.26355  -2.21238
C    4.02742  -1.07580  -4.18555
C    5.56005  -1.13190  -4.32197
H    5.96088  -2.09392  -3.98016
H    6.04345  -0.34201  -3.73783
H    5.86161  -1.00411  -5.36602
C    3.32825  -2.16556  -5.02518
H    2.26973  -2.20196  -4.75684
H    3.74643  -3.14927  -4.77397
H   -4.45015   2.31364  -2.90984
H   -1.64486  -3.31366  -4.19781
H    3.69284  -0.10239  -4.56143
H    1.05073   5.02996  -3.06299
C   -6.82088   3.75031  -3.04162
H   -7.87330   3.84558  -2.75053
H   -6.52241   4.69881  -3.49945
H   -6.75841   2.97279  -3.81267
C    2.30574   7.49362  -3.35244
H    1.32419   7.46482  -3.84125
H    2.45978   8.51220  -2.97810
H    3.06560   7.30936  -4.11876
C    3.44369  -1.94023  -6.54068
H    2.88598  -2.70978  -7.08667
H    3.02754  -0.96628  -6.82519
H    4.48011  -1.97768  -6.89374
C   -2.88285  -5.56628  -5.21176
H   -3.68487  -5.15543  -5.83359
H   -1.92942  -5.34963  -5.70866
H   -3.00770  -6.65489  -5.19479
C    1.23114  -2.45556   1.26944
C    1.04208  -1.17254   2.03280
H    2.28006  -2.76108   1.20910
H    0.85933  -2.35408   0.25272
C    0.43259  -0.08969   1.51242
O    1.42010  -1.29995   3.37238
Si   2.88818  -0.87056   4.12784
C    3.48908   0.81802   3.56726
H    4.51357   0.97843   3.92503
H    3.51057   0.88458   2.47444
H    2.86908   1.64263   3.92590
C    4.23050  -2.11665   3.67442
H    5.18062  -1.82761   4.14070
H    4.00209  -3.14017   3.98437
H    4.40487  -2.12490   2.59133
C    2.47397  -0.91268   5.99189
C    1.44024   0.18669   6.32839
C    1.88784  -2.28622   6.38785
C    3.76469  -0.66117   6.80684
H    1.83608   1.19149   6.13980
H    0.51964   0.07562   5.74526
H    1.17048   0.13981   7.39350
H    2.57437  -3.11185   6.16740
H    1.67861  -2.31267   7.46721
H    0.94582  -2.48285   5.86430
H    3.53811  -0.65024   7.88250
H    4.51628  -1.44235   6.64216
H    4.22530   0.30430   6.56433
C    0.02171   1.00951   2.41570
O   -0.98451   0.96449   3.11782
O    0.81593   2.10061   2.35215
C    0.39607   3.23238   3.13808
H    0.45509   3.00266   4.20675
H    1.08257   4.03901   2.87830
H   -0.63063   3.51101   2.89310
C   -4.62791  -0.40281   2.78578
C   -3.51062  -0.86860   2.12485
C   -2.72363  -1.89061   2.72006
C   -3.07431  -2.41669   4.00368
C   -4.23078  -1.92881   4.65214
C   -4.99008  -0.94204   4.04617
H   -1.33348  -2.06916   1.05793
H   -5.21875   0.39858   2.35189
H   -3.19348  -0.43376   1.18102
C   -1.57255  -2.37527   2.07047
C   -2.22065  -3.40978   4.56375
H   -4.50767  -2.32412   5.62678
H   -5.87487  -0.56011   4.55094
C   -1.09682  -3.81041   3.90677
H   -2.44188  -3.85047   5.53187
H   -0.41530  -4.54549   4.31357
N   -0.78120  -3.28651   2.66314
C    0.48240  -3.69094   1.95636
C    0.16084  -4.68966   0.91039
N   -0.04804  -5.47271   0.07869
C    1.39230  -4.36835   2.90478
N    2.12787  -4.95403   3.58575
191
M3-R Rh2SiC79N7H83O19
Rh  -0.19329  -0.15171  -0.75455
Rh  -0.17759  -0.11827  -3.24369
N   -3.88133  -3.19256  -1.13973
O   -4.52262  -1.04327  -1.79520
O   -3.64827  -5.14071   0.12844
C   -4.64043  -2.00893  -1.06121
C   -5.58591  -2.19763   0.07757
C   -6.57460  -1.35408   0.56995
H   -6.75153  -0.37569   0.12996
C   -7.32482  -1.81434   1.66454
H   -8.10952  -1.18553   2.07908
C   -7.07680  -3.07229   2.23661
H   -7.67621  -3.40040   3.08292
C   -6.06618  -3.90964   1.73614
H   -5.86422  -4.88234   2.17812
C   -5.33291  -3.44533   0.65050
C   -4.20575  -4.07741  -0.09646
N    3.39983  -3.38639  -0.92808
O    1.51392  -4.64740  -1.50067
O    5.14871  -2.48559   0.33266
C    2.47034  -4.43679  -0.77782
C    2.90250  -5.19905   0.43139
C    2.38446  -6.35999   0.99253
H    1.52819  -6.86481   0.55160
C    3.01262  -6.85477   2.14709
H    2.63895  -7.76253   2.61525
C    4.11798  -6.19596   2.70786
H    4.58373  -6.60383   3.60208
C    4.62982  -5.02212   2.13158
H    5.48750  -4.50976   2.56009
C    4.00131  -4.54369   0.98813
C    4.29892  -3.34812   0.14647
N    3.57515   3.05902  -1.29502
O    4.11879   0.88513  -1.95773
O    3.64971   5.13057  -0.21134
C    4.37483   1.90382  -1.33805
C    5.55521   2.17965  -0.46571
C    6.65281   1.38140  -0.16368
H    6.75367   0.38140  -0.57837
C    7.62209   1.91973   0.69856
H    8.49848   1.32940   0.95609
C    7.48053   3.21043   1.23314
H    8.24980   3.60001   1.89597
C    6.36420   4.00477   0.92363
H    6.24715   5.00532   1.33285
C    5.41326   3.46200   0.06701
C    4.13811   4.04152  -0.45037
N   -3.68938   3.20275  -0.90807
O   -1.64788   4.27784  -1.29482
O   -5.65702   2.50087   0.14072
C   -2.67035   4.13740  -0.64650
C   -3.09742   4.88329   0.57594
C   -2.48078   5.93275   1.24800
H   -1.53488   6.34362   0.90367
C   -3.12770   6.43578   2.38900
H   -2.67752   7.25627   2.94296
C   -4.34648   5.89512   2.82881
H   -4.82158   6.30502   3.71708
C   -4.95822   4.83359   2.14178
H   -5.90099   4.40856   2.47743
C   -4.30968   4.34538   1.01310
C   -4.68878   3.24172   0.08121
O   -1.54540  -1.72601  -0.93980
O   -1.35879  -1.83692  -3.20203
O    1.44559  -1.45029  -0.87972
O    1.56275  -1.28144  -3.14530
O    1.16615   1.51320  -0.87066
O    0.99522   1.59959  -3.12990
O   -1.81819   1.18095  -0.85452
O   -1.91172   1.04730  -3.12294
C   -1.82122  -2.20712  -2.08469
C   -2.76760  -3.42844  -2.06777
H   -2.17812  -4.21930  -1.58898
C   -3.18929  -3.95058  -3.46490
C   -3.76262  -5.38054  -3.34771
H   -4.71798  -5.35124  -2.80640
H   -3.08473  -5.98588  -2.73333
C   -4.12746  -3.00721  -4.23560
H   -3.74041  -1.98712  -4.25448
H   -5.12904  -2.98451  -3.79054
H   -4.23580  -3.34496  -5.27119
C    1.98479  -1.66050  -2.01553
C    3.36140  -2.35505  -1.97191
H    4.02196  -1.56494  -1.59852
C    3.93214  -2.79175  -3.34502
C    3.14944  -3.91391  -4.04605
H    3.29557  -4.88118  -3.55268
H    3.48714  -4.01742  -5.08233
H    2.07894  -3.70161  -4.06383
C    5.43577  -3.11998  -3.20977
H    5.56137  -4.02718  -2.60259
H    5.92588  -2.31005  -2.65481
C    1.43774   2.00381  -2.02278
C    2.32952   3.27181  -2.05232
H    1.77406   4.01799  -1.47216
C    2.55066   3.84829  -3.47811
C    2.96229   5.33660  -3.41865
H    2.30245   5.86126  -2.71752
H    3.97543   5.42974  -3.00675
C    3.51497   3.01320  -4.33707
H    3.24251   1.95638  -4.33356
H    4.54933   3.10545  -3.98302
H    3.49579   3.35985  -5.37476
C   -2.33397   1.43072  -1.99404
C   -3.67309   2.19613  -1.97652
H   -4.39048   1.43478  -1.64914
C   -4.16012   2.70845  -3.35613
C   -5.64306   3.11465  -3.27478
H   -5.78289   4.00776  -2.65363
H   -6.25533   2.31294  -2.84884
H   -6.03934   3.34153  -4.26911
C   -3.28491   3.81807  -3.97547
H   -2.23165   3.55237  -3.85589
H   -3.43292   4.75561  -3.42377
H    3.84447  -1.89014  -3.96232
H    1.56026   3.80185  -3.94461
H   -4.08767   1.82886  -4.00588
H   -2.24771  -4.01537  -4.02340
C    6.16387  -3.30761  -4.54904
H    7.23886  -3.44740  -4.38692
H    5.80039  -4.18181  -5.09858
H    6.03686  -2.43024  -5.19481
C   -3.96907  -6.08859  -4.69495
H   -3.03936  -6.11249  -5.27652
H   -4.28906  -7.12519  -4.53900
H   -4.73345  -5.59979  -5.30763
C   -3.56474   4.05988  -5.46685
H   -2.87779   4.81343  -5.86887
H   -3.42252   3.14025  -6.04723
H   -4.58363   4.41787  -5.65084
C    2.90432   6.05119  -4.77726
H    3.63319   5.65087  -5.48953
H    1.90955   5.96049  -5.23023
H    3.11779   7.11944  -4.65769
C   -0.63873   2.05265   2.02653
C   -0.69393   0.57810   2.30548
H   -1.56370   2.58649   2.26811
H   -0.40400   2.24011   0.97963
C   -0.32886  -0.35540   1.41335
O   -0.93571   0.31823   3.66660
Si  -2.45028  -0.02130   4.37798
C   -3.54367  -0.95641   3.17523
H   -4.49965  -1.21245   3.64774
H   -3.77042  -0.33433   2.30205
H   -3.07886  -1.87258   2.80511
C   -3.33067   1.58964   4.82120
H   -4.33002   1.36956   5.21721
H   -2.79773   2.18818   5.56578
H   -3.47720   2.21821   3.93429
C   -2.02922  -1.01948   5.95268
C   -1.42947  -2.39065   5.56902
C   -1.00449  -0.25166   6.81753
C   -3.31767  -1.24347   6.77885
H   -2.13341  -2.99586   4.98637
H   -0.51218  -2.28153   4.98058
H   -1.17810  -2.96238   6.47439
H   -1.37338   0.73412   7.12442
H   -0.77964  -0.81713   7.73358
H   -0.06067  -0.10735   6.27970
H   -3.09452  -1.83822   7.67611
H   -3.76118  -0.29980   7.11751
H   -4.08203  -1.78921   6.21227
C   -0.01308  -1.72257   1.88930
O    1.09583  -2.03788   2.31255
O   -1.02236  -2.61497   1.76756
C   -0.69331  -3.98799   2.05991
H   -0.39757  -4.10235   3.10637
H   -1.59991  -4.55628   1.84861
H    0.12167  -4.32597   1.41660
C    4.72332  -0.66202   5.86855
C    3.66840   0.21489   5.75983
C    3.19759   0.58605   4.46639
C    3.81807   0.04914   3.29205
C    4.89539  -0.86168   3.43788
C    5.33471  -1.20182   4.70162
H    1.60760   1.88021   5.17632
H    5.09219  -0.95218   6.84911
H    3.18993   0.62673   6.64563
C    2.11926   1.46831   4.31448
C    3.31357   0.46127   2.03443
H    5.35124  -1.28894   2.54812
H    6.16206  -1.89883   4.81507
C    2.26960   1.34086   1.95132
H    3.72513   0.05845   1.11489
H    1.85914   1.66486   1.00078
N    1.68616   1.83683   3.10033
C    0.48716   2.73792   2.92876
C    0.91372   4.00562   2.29561
N    1.18022   5.02546   1.80824
C   -0.05430   3.11579   4.25059
N   -0.47148   3.50148   5.26323
191
TS5-S Rh2SiC79N7H83O19
Rh  -0.07869   0.19401  -0.46052
Rh  -0.27755   0.57557  -2.87722
N    4.72859   1.03759  -1.28803
O    4.18612  -0.92264  -2.43998
O    5.68235   2.49021   0.27421
C    4.90715  -0.30383  -1.67631
C    6.12031  -0.78509  -0.95050
C    6.76619  -2.01435  -0.99938
H    6.40577  -2.81504  -1.64049
C    7.89886  -2.18049  -0.18549
H    8.43471  -3.12685  -0.19755
C    8.35118  -1.14423   0.64697
H    9.23094  -1.30366   1.26626
C    7.68593   0.09215   0.69110
H    8.02890   0.89842   1.33493
C    6.57069   0.24609  -0.12406
C    5.65983   1.41469  -0.30407
N   -0.51379   5.02422  -0.06727
O    1.57785   4.39266  -0.89659
O   -2.17594   5.90937   1.31409
C    0.89298   4.98612  -0.08109
C    1.33923   5.80178   1.08653
C    2.62115   6.11692   1.52232
H    3.50059   5.75638   0.99424
C    2.73272   6.91497   2.67265
H    3.71822   7.18403   3.04573
C    1.59162   7.37007   3.35221
H    1.71088   7.98425   4.24178
C    0.30189   7.04338   2.90250
H   -0.58617   7.39001   3.42508
C    0.20430   6.25587   1.76143
C   -0.99803   5.74809   1.03923
N   -4.98600  -0.57268  -0.69877
O   -4.52597   1.68875  -1.06009
O   -5.86446  -2.54142   0.20324
C   -5.15877   0.80844  -0.49982
C   -6.23251   0.94749   0.52824
C   -6.81340   2.08747   1.07106
H   -6.50303   3.08116   0.75821
C   -7.81815   1.90389   2.03440
H   -8.29908   2.77131   2.48056
C   -8.21264   0.61716   2.43414
H   -8.99250   0.50764   3.18425
C   -7.61725  -0.52757   1.87996
H   -7.91659  -1.52781   2.18328
C   -6.62808  -0.33213   0.92291
C   -5.82789  -1.32534   0.14888
N    0.57135  -4.50598  -1.66826
O   -1.65391  -3.89924  -2.04519
O    2.46300  -5.50653  -0.73312
C   -0.82547  -4.63578  -1.53717
C   -1.04793  -5.81399  -0.64791
C   -2.23113  -6.40016  -0.21481
H   -3.19902  -6.00511  -0.51152
C   -2.12430  -7.51495   0.63303
H   -3.02760  -8.00001   0.99515
C   -0.87148  -8.00844   1.02903
H   -0.82285  -8.87153   1.68889
C    0.31783  -7.40202   0.59154
H    1.29195  -7.77499   0.89825
C    0.19996  -6.30312  -0.25152
C    1.25189  -5.44825  -0.87394
O    1.92839   0.77422  -0.69884
O    1.63173   1.35970  -2.87199
O   -0.61120   2.22103  -0.23764
O   -0.99449   2.47418  -2.46043
O   -2.11778  -0.40503  -0.51672
O   -2.18861  -0.22279  -2.77369
O    0.47494  -1.78412  -0.95215
O    0.48402  -1.33025  -3.17568
C    2.30836   1.27906  -1.80225
C    3.69865   1.95037  -1.80031
H    3.60711   2.72819  -1.03564
C    4.08106   2.65152  -3.13082
C    5.20521   3.68417  -2.88950
H    6.13736   3.16532  -2.62822
H    4.94223   4.29542  -2.01790
C    4.41832   1.68623  -4.27919
H    3.64981   0.92081  -4.39807
H    5.37958   1.18471  -4.11368
H    4.49603   2.23373  -5.22370
C   -0.93749   2.89590  -1.26762
C   -1.39734   4.35129  -1.02602
H   -2.35206   4.24908  -0.49694
C   -1.67687   5.16066  -2.32104
C   -0.41202   5.52001  -3.11777
H    0.18421   6.28246  -2.60277
H   -0.68409   5.92424  -4.09770
H    0.22065   4.64582  -3.28144
C   -2.54113   6.40211  -2.00640
H   -1.96044   7.11728  -1.40889
H   -3.38563   6.09736  -1.37644
C   -2.69033  -0.52511  -1.65555
C   -4.08247  -1.19504  -1.67515
H   -3.89887  -2.20328  -1.28560
C   -4.69126  -1.34832  -3.09604
C   -5.78643  -2.43846  -3.10669
H   -5.41175  -3.32396  -2.57992
H   -6.66092  -2.09549  -2.53860
C   -5.18429  -0.02600  -3.70691
H   -4.42399   0.75454  -3.64425
H   -6.08956   0.33527  -3.20408
H   -5.43365  -0.16650  -4.76314
C    0.66625  -2.08444  -2.17763
C    1.26667  -3.47846  -2.45274
H    2.26957  -3.42652  -2.01226
C    1.44434  -3.82932  -3.95332
C    2.41661  -5.01303  -4.11014
H    1.98798  -5.94359  -3.71968
H    3.35836  -4.83254  -3.58145
H    2.65575  -5.17912  -5.16470
C    0.12121  -4.06274  -4.71295
H   -0.59853  -3.29159  -4.42917
H   -0.31287  -5.02369  -4.40557
H   -2.28184   4.48546  -2.93698
H   -3.86026  -1.71468  -3.70909
H    1.92431  -2.94219  -4.38222
H    3.17962   3.20817  -3.41080
C   -3.08908   7.11499  -3.25169
H   -3.76655   7.92623  -2.96199
H   -2.29385   7.55654  -3.86082
H   -3.65338   6.42294  -3.88859
C    5.46714   4.61583  -4.08224
H    4.54992   5.13327  -4.38886
H    6.20621   5.38049  -3.81713
H    5.85387   4.07709  -4.95333
C    0.28007  -4.04812  -6.24114
H   -0.69471  -4.16314  -6.72857
H    0.71001  -3.09857  -6.58183
H    0.92299  -4.85680  -6.60514
C   -6.23465  -2.85656  -4.51517
H   -6.73254  -2.04274  -5.05237
H   -5.38135  -3.18479  -5.12114
H   -6.94236  -3.69148  -4.45979
C   -0.27038  -2.56551   1.89994
C    0.59188  -1.39024   2.25193
H    0.27928  -3.50598   1.85392
H   -0.77050  -2.40617   0.94760
C    0.16738  -0.13356   1.91399
O    1.54872  -1.63555   3.17990
Si   3.06524  -2.43349   3.21850
C    4.10490  -1.70988   1.84004
H    5.10304  -2.16111   1.81355
H    3.62953  -1.89964   0.87128
H    4.21030  -0.62673   1.94412
C    2.83229  -4.28177   2.94455
H    3.77713  -4.80756   3.13074
H    2.07883  -4.71699   3.60915
H    2.55608  -4.50775   1.90826
C    3.73107  -2.05547   4.96351
C    3.84313  -0.52908   5.17646
C    2.79027  -2.64543   6.03863
C    5.13451  -2.69069   5.11380
H    4.52403  -0.06169   4.45565
H    2.86932  -0.03619   5.08978
H    4.23523  -0.31682   6.18128
H    2.68957  -3.73312   5.95181
H    3.18424  -2.43176   7.04242
H    1.78604  -2.21208   5.98024
H    5.53934  -2.47503   6.11238
H    5.11143  -3.78149   5.00475
H    5.84944  -2.29439   4.38263
C    0.84473   1.00751   2.58999
O    0.33179   1.70020   3.45886
O    2.10172   1.22012   2.13917
C    2.78843   2.35133   2.71263
H    2.97584   2.18756   3.77757
H    3.72725   2.43250   2.16365
H    2.19604   3.26073   2.59124
C   -3.38532   3.04518   2.53667
C   -2.85153   1.84089   2.09966
C   -2.43411   0.87351   3.03300
C   -2.57147   1.13071   4.42332
C   -3.10687   2.36234   4.84820
C   -3.50638   3.30977   3.91432
H   -2.17312  -0.71743   1.58719
H   -3.69372   3.79713   1.81660
H   -2.72980   1.64616   1.04035
C   -1.88214  -0.39249   2.57813
C   -2.18647   0.10052   5.34930
H   -3.20442   2.56141   5.91357
H   -3.91403   4.26242   4.24549
C   -1.82476  -1.12165   4.89555
H   -2.21462   0.27762   6.42026
H   -1.56999  -1.93629   5.56157
N   -1.81061  -1.40738   3.53159
C   -1.39509  -2.72613   3.03261
C   -2.55606  -3.44782   2.45376
N   -3.44993  -4.03850   2.00533
C   -0.87090  -3.58845   4.11667
N   -0.45652  -4.32359   4.91426
191
TS5-R Rh2SiC79N7H83O19
Rh  -0.30001   0.03332  -0.02793
Rh  -1.48242  -0.23430  -2.16721
N    2.61764   3.02943  -2.61242
O    2.86879   0.79685  -3.23903
O    3.08314   5.17414  -1.80937
C    3.34728   1.85470  -2.86830
C    4.77600   2.18229  -2.59261
C    5.91255   1.38885  -2.69474
H    5.84692   0.34752  -2.99997
C    7.14199   1.98657  -2.37117
H    8.05677   1.40240  -2.44086
C    7.21177   3.32598  -1.95590
H    8.17957   3.75931  -1.71382
C    6.05295   4.11290  -1.84644
H    6.09909   5.14954  -1.52160
C    4.84226   3.51305  -2.17370
C    3.45390   4.06401  -2.15641
N   -3.09078   3.92740   0.56753
O   -1.36208   4.13071  -0.98881
O   -4.47051   4.31166   2.41325
C   -1.93628   4.51128   0.01725
C   -1.59440   5.66686   0.89648
C   -0.55804   6.58827   0.80422
H    0.17358   6.53759   0.00131
C   -0.49467   7.58737   1.78904
H    0.30134   8.32756   1.75225
C   -1.44323   7.64761   2.82236
H   -1.36789   8.43419   3.56973
C   -2.48550   6.71001   2.90396
H   -3.22518   6.75174   3.69976
C   -2.53672   5.72546   1.92415
C   -3.50281   4.60527   1.73213
N   -4.46134  -3.39323  -0.17048
O   -4.15639  -4.16658  -2.37814
O   -5.51425  -2.58009   1.75345
C   -4.86139  -3.73585  -1.48798
C   -6.33516  -3.49214  -1.54236
C   -7.22843  -3.67031  -2.59267
H   -6.89191  -4.03126  -3.56145
C   -8.57686  -3.36210  -2.35119
H   -9.30699  -3.48494  -3.14787
C   -9.00112  -2.89601  -1.09592
H  -10.05266  -2.66618  -0.94034
C   -8.08950  -2.72241  -0.04269
H   -8.40950  -2.36242   0.93200
C   -6.75662  -3.02869  -0.29702
C   -5.56398  -2.95033   0.58847
N    3.08111  -3.15028  -1.70620
O    1.40883  -4.38489  -0.63558
O    5.17325  -2.25060  -2.23857
C    2.58349  -4.11701  -0.81308
C    3.77810  -4.71486  -0.14277
C    3.86197  -5.73356   0.79978
H    2.96918  -6.22527   1.17872
C    5.14485  -6.10441   1.23584
H    5.25327  -6.89932   1.97004
C    6.29202  -5.46716   0.73690
H    7.27147  -5.77949   1.09169
C    6.19349  -4.43536  -0.21088
H    7.07741  -3.93712  -0.60154
C    4.91884  -4.07748  -0.63499
C    4.48254  -3.04502  -1.62091
O    0.72029   1.62842  -0.96352
O   -0.42115   1.37219  -2.90720
O   -1.83652   1.37977   0.48417
O   -2.92675   1.09244  -1.48462
O   -1.39230  -1.68508   0.59594
O   -2.55722  -1.80300  -1.34818
O    1.19713  -1.26254  -0.78441
O    0.07148  -1.49292  -2.74139
C    0.43737   1.93514  -2.16564
C    1.16115   3.17017  -2.75054
H    0.88582   3.98324  -2.07256
C    0.69494   3.56903  -4.17662
C    1.04888   5.04437  -4.47006
H    2.13775   5.15799  -4.55278
H    0.74489   5.65824  -3.61373
C    1.18936   2.62330  -5.28376
H    0.97920   1.58021  -5.04223
H    2.26886   2.72807  -5.44787
H    0.69261   2.85533  -6.23095
C   -2.74364   1.65554  -0.36298
C   -3.77522   2.73339   0.05345
H   -4.28418   2.31119   0.92799
C   -4.85259   3.02843  -1.02586
C   -4.31527   3.81544  -2.23271
H   -4.08212   4.85213  -1.96175
H   -5.06453   3.84676  -3.02976
H   -3.41265   3.35693  -2.64011
C   -6.09280   3.70158  -0.39637
H   -5.83748   4.71543  -0.06290
H   -6.37656   3.15120   0.50887
C   -2.28144  -2.18239  -0.17445
C   -3.11172  -3.33917   0.41421
H   -3.30442  -3.04191   1.44551
C   -2.33113  -4.68484   0.50018
C   -3.17173  -5.72570   1.27140
H   -3.57043  -5.26214   2.18406
H   -4.04299  -6.00695   0.66545
C   -1.78187  -5.23376  -0.82562
H   -1.33468  -4.44554  -1.43412
H   -2.56336  -5.70933  -1.42201
H   -0.99599  -5.96662  -0.62380
C    1.07121  -1.67537  -1.98419
C    2.28905  -2.35126  -2.64826
H    2.93042  -1.49677  -2.89293
C    1.97526  -3.07377  -3.98763
C    3.27545  -3.37420  -4.75544
H    3.87213  -4.14856  -4.25823
H    3.90090  -2.48118  -4.85288
H    3.05072  -3.73419  -5.76385
C    1.08404  -4.32466  -3.84353
H    0.26097  -4.10328  -3.16009
H    1.65981  -5.13808  -3.38252
H   -5.16210   2.03898  -1.38268
H   -1.46424  -4.43188   1.12501
H    1.41290  -2.33124  -4.56371
H   -0.39780   3.49716  -4.13465
C   -7.30855   3.76958  -1.33278
H   -8.17910   4.17166  -0.80215
H   -7.12985   4.41365  -2.19987
H   -7.57837   2.77405  -1.70639
C    0.38680   5.60654  -5.73699
H   -0.70292   5.48660  -5.70094
H    0.59909   6.67701  -5.83819
H    0.74666   5.11577  -6.64709
C    0.49298  -4.81584  -5.17398
H   -0.18145  -5.66248  -5.00366
H   -0.08884  -4.02395  -5.66058
H    1.26320  -5.14831  -5.87846
C   -2.39689  -6.99316   1.66077
H   -2.06902  -7.55708   0.78183
H   -1.50949  -6.74867   2.25593
H   -3.02834  -7.65812   2.26092
C    1.49746  -1.94080   2.37977
C    1.81384  -0.47750   2.30916
H    2.39781  -2.55505   2.39060
H    0.84707  -2.25279   1.56279
C    0.78574   0.42246   2.06686
O    3.01463  -0.11241   2.76794
Si   4.69675  -0.37758   2.54340
C    5.07672   0.08745   0.76981
H    6.09247  -0.21078   0.48710
H    4.38414  -0.40501   0.07944
H    4.97838   1.16466   0.60792
C    5.09014  -2.18880   2.87407
H    6.17595  -2.34088   2.89906
H    4.69170  -2.52827   3.83627
H    4.70282  -2.84849   2.09059
C    5.54607   0.75218   3.82068
C    5.05499   2.20975   3.67883
C    5.26526   0.26212   5.25940
C    7.07280   0.70970   3.56163
H    5.25912   2.61945   2.68323
H    3.97933   2.29506   3.86076
H    5.57007   2.85064   4.40809
H    5.64595  -0.75071   5.43309
H    5.75969   0.92429   5.98396
H    4.19581   0.25774   5.49344
H    7.59309   1.34707   4.28970
H    7.48661  -0.30056   3.66730
H    7.33437   1.07840   2.56268
C    1.13328   1.87088   2.07764
O    0.46303   2.75557   2.59329
O    2.26987   2.14933   1.39280
C    2.55761   3.55116   1.23743
H    2.62824   4.04518   2.20982
H    3.51616   3.59839   0.72056
H    1.78195   4.03408   0.63979
C   -2.57985   2.77184   4.90517
C   -1.43441   2.06032   4.57439
C   -1.52879   0.76508   4.02885
C   -2.80888   0.17211   3.88207
C   -3.96470   0.92182   4.18680
C   -3.85227   2.21126   4.68640
H    0.52365   0.29836   4.36961
H   -2.49153   3.77097   5.32460
H   -0.45915   2.50695   4.72656
C   -0.31356  -0.02005   3.75351
C   -2.88602  -1.22787   3.55973
H   -4.94239   0.46314   4.05411
H   -4.74496   2.78591   4.91840
C   -1.76142  -1.97450   3.54281
H   -3.84516  -1.70560   3.38800
H   -1.77832  -3.04500   3.38734
N   -0.50795  -1.41193   3.77598
C    0.69711  -2.23081   3.72535
C    0.40588  -3.68072   3.77051
N    0.25857  -4.83222   3.78479
C    1.55152  -1.95075   4.91292
N    2.20815  -1.74413   5.84815
57
P2-S SiC23N3H27O3
C   -0.26284   1.85007  -0.88106
C   -0.52666   0.44688  -0.36522
H   -1.14776   2.47896  -0.78683
H    0.04166   1.84808  -1.93351
C    0.55562  -0.34770  -0.19948
O   -1.77332   0.16030   0.06028
Si  -3.24286  -0.07548  -0.78411
C   -2.98846  -1.44198  -2.04834
H   -3.91124  -1.63619  -2.60790
H   -2.22128  -1.15658  -2.77816
H   -2.66303  -2.37614  -1.58191
C   -3.70140   1.51749  -1.68251
H   -4.67671   1.41121  -2.17281
H   -3.76551   2.37917  -1.00894
H   -2.97921   1.75837  -2.47177
C   -4.48018  -0.51270   0.59150
C   -4.03286  -1.80070   1.32025
C   -4.56267   0.64383   1.61502
C   -5.87746  -0.74219  -0.03291
H   -3.99342  -2.66306   0.64432
H   -3.04501  -1.68462   1.77795
H   -4.74440  -2.04617   2.12087
H   -4.91707   1.57513   1.15762
H   -5.26923   0.38717   2.41652
H   -3.59256   0.84509   2.08208
H   -6.60144  -1.00140   0.75169
H   -6.25854   0.15257  -0.53945
H   -5.87853  -1.56554  -0.75752
C    0.53284  -1.64058   0.53648
O    1.31266  -1.91881   1.43051
O   -0.43574  -2.48140   0.10463
C   -0.52437  -3.73606   0.81849
H   -0.74063  -3.56006   1.87499
H   -1.34171  -4.28180   0.34621
H    0.41219  -4.29187   0.72823
C    4.37402  -2.51786  -1.31202
C    3.25960  -1.67565  -1.40137
C    3.12366  -0.57713  -0.54953
C    4.13156  -0.28767   0.39194
C    5.24691  -1.14052   0.47607
C    5.36733  -2.25002  -0.36279
H    1.74988   0.48373  -1.73701
H    4.46561  -3.37176  -1.97927
H    2.48672  -1.88489  -2.14043
C    1.87556   0.28729  -0.66486
C    4.00575   0.90695   1.21683
H    6.02602  -0.92219   1.20431
H    6.23668  -2.89925  -0.28348
C    3.01385   1.78947   0.98874
H    4.73272   1.11437   1.99577
H    2.92637   2.70720   1.56349
N    2.06378   1.61909  -0.02265
C    0.90210   2.49942  -0.05135
C    1.25802   3.80604  -0.67856
N    1.53614   4.80397  -1.20543
C    0.37315   2.78694   1.31920
N   -0.04818   3.00476   2.37978
57
P2-R SiC23N3H27O3
C   -0.26402   2.11441   0.03370
C   -0.45713   0.63420   0.29242
H   -1.03481   2.67705   0.56881
H   -0.37235   2.34130  -1.03258
C    0.56636  -0.19551   0.58060
O   -1.75542   0.23965   0.34468
Si  -2.97884   0.12643  -0.84199
C   -2.36423  -0.96257  -2.24419
H   -3.09416  -0.99633  -3.06181
H   -1.42821  -0.56889  -2.65816
H   -2.16543  -1.98645  -1.91507
C   -3.36442   1.84546  -1.51711
H   -4.26367   1.81529  -2.14443
H   -3.54361   2.57829  -0.72296
H   -2.55455   2.22612  -2.15021
C   -4.45729  -0.60058   0.11145
C   -4.07478  -1.95754   0.74458
C   -4.89139   0.37299   1.23199
C   -5.63860  -0.81366  -0.86522
H   -3.78277  -2.69643  -0.01087
H   -3.24700  -1.85352   1.45348
H   -4.93244  -2.37273   1.29215
H   -5.21684   1.34137   0.83413
H   -5.73762  -0.04884   1.79206
H   -4.08186   0.55618   1.94724
H   -6.50046  -1.23224  -0.32758
H   -5.97208   0.12357  -1.32655
H   -5.38868  -1.51467  -1.67070
C    0.32149  -1.58374   1.07248
O    0.72664  -1.98277   2.15308
O   -0.35396  -2.35835   0.20087
C   -0.59482  -3.71700   0.63553
H   -1.19114  -3.72614   1.55080
H   -1.13918  -4.19034  -0.18199
H    0.35323  -4.23046   0.81298
C    4.47089  -2.62856   0.36957
C    3.59302  -1.68266   0.91490
C    3.04934  -0.67571   0.11388
C    3.42233  -0.58228  -1.24427
C    4.29572  -1.54101  -1.78586
C    4.81085  -2.56427  -0.98643
H    2.25350   0.43739   1.74435
H    4.88422  -3.41020   1.00277
H    3.31869  -1.74294   1.96487
C    2.02470   0.30524   0.68086
C    2.96219   0.57209  -2.00560
H    4.58646  -1.46651  -2.83228
H    5.48842  -3.29957  -1.41530
C    2.39237   1.61280  -1.36786
H    3.17057   0.64930  -3.06866
H    2.14908   2.53242  -1.89188
N    2.17838   1.62436   0.02686
C    1.15457   2.57646   0.48237
C    1.42015   3.93744  -0.05140
N    1.57701   5.00520  -0.47987
C    1.20327   2.69804   1.96572
N    1.20530   2.81548   3.12065
171
COM1-2 Rh2SiC67N6H60O19Cl16 
Rh   0.20329   0.14438  -1.21497
Rh   0.39821   0.29573  -3.62968
N    0.97389  -4.49071  -1.53708
O   -1.18698  -3.94442  -2.20451
O    2.77777  -5.19106  -0.24686
C   -0.42586  -4.49946  -1.43636
C   -0.74446  -5.31557  -0.21810
C   -1.96960  -5.67855   0.32765
C   -1.95965  -6.47253   1.49916
C   -0.74138  -6.86887   2.09019
C    0.49323  -6.47932   1.52164
C    0.46143  -5.70651   0.36818
C    1.57890  -5.13732  -0.45084
N    4.92769   1.06036  -1.01247
O    4.59455  -1.09405  -1.82689
O    5.47343   2.83617   0.39181
C    5.08088  -0.33186  -1.01418
C    5.93427  -0.65242   0.18015
C    6.44843  -1.86593   0.62174
C    7.23321  -1.86200   1.79985
C    7.47759  -0.65914   2.49697
C    6.94761   0.56563   2.02662
C    6.18459   0.53932   0.86546
C    5.51559   1.65369   0.11605
N   -0.65481   4.82425  -1.10027
O    1.61083   4.39570  -1.41508
O   -2.68290   5.41988  -0.12505
C    0.70254   4.86016  -0.75317
C    0.77022   5.56511   0.57069
C    1.86567   5.89391   1.36092
C    1.61961   6.57390   2.57784
C    0.30289   6.89850   2.96831
C   -0.79726   6.54746   2.15101
C   -0.53404   5.88292   0.95949
C   -1.46836   5.37958  -0.09969
N   -4.48374  -0.67762  -1.87896
O   -3.92167   1.56080  -2.17579
O   -5.37137  -2.64209  -0.99768
C   -4.56173   0.69393  -1.61113
C   -5.57006   0.84233  -0.50761
C   -6.05219   1.98232   0.12523
C   -7.02889   1.81228   1.13580
C   -7.48748   0.52385   1.48432
C   -6.97469  -0.62312   0.83319
C   -6.01824  -0.43372  -0.15686
C   -5.29565  -1.42971  -1.01479
O    0.93892  -1.79451  -1.38107
O    1.10807  -1.65685  -3.63541
O    2.16250   0.87331  -1.10619
O    2.32183   1.02648  -3.35858
O   -0.49973   2.11504  -1.23445
O   -0.33604   2.23652  -3.48909
O   -1.74741  -0.56714  -1.53142
O   -1.53244  -0.42656  -3.78133
C    1.20440  -2.27090  -2.53186
C    1.75124  -3.71682  -2.51808
H    2.73994  -3.61964  -2.05337
C    1.97797  -4.44606  -3.88673
C    2.48608  -5.87614  -3.59136
H    1.72499  -6.49059  -3.09862
H    3.38023  -5.86984  -2.95880
C    0.70710  -4.53961  -4.75458
H    0.30890  -3.55251  -4.99771
H   -0.08385  -5.11096  -4.26047
H    0.94921  -5.05221  -5.69308
C    2.77406   1.16946  -2.18589
C    4.15768   1.83458  -1.99936
H    3.92590   2.77286  -1.48190
C    4.97326   2.21888  -3.28344
C    5.29176   1.01681  -4.19568
H    5.91663   0.27404  -3.69059
H    5.84664   1.36928  -5.07315
H    4.38523   0.51736  -4.54184
C    6.30505   2.86637  -2.83745
H    6.95963   2.15512  -2.32203
H    6.14298   3.72228  -2.17415
C   -0.61264   2.71927  -2.35277
C   -1.21567   4.14112  -2.27688
H   -2.26391   3.96446  -2.00611
C   -1.23458   5.01253  -3.58149
C   -1.82750   6.39714  -3.23175
H   -2.81353   6.31403  -2.76290
H   -1.17727   6.96743  -2.55962
C    0.16015   5.21593  -4.20672
H    0.62102   4.26719  -4.48832
H    0.84151   5.73438  -3.52599
H    0.06344   5.83053  -5.10946
C   -2.17626  -0.69517  -2.72273
C   -3.59161  -1.30489  -2.86794
H   -3.47114  -2.33385  -2.50897
C   -4.20878  -1.39474  -4.30917
C   -5.62572  -2.00505  -4.20057
H   -6.32167  -1.34687  -3.66922
H   -5.61776  -2.97411  -3.69171
H   -6.03077  -2.15596  -5.20701
C   -4.31804  -0.02723  -5.01413
H   -3.34323   0.44905  -5.13207
H   -4.96878   0.66244  -4.46778
C   -2.27156   0.88965   1.32688
C   -1.28086   0.21121   1.91976
H   -3.19622   1.09717   1.85603
H   -2.16227   1.25543   0.31521
C    0.08177   0.02514   1.27865
O   -1.30244  -0.26080   3.19974
Si  -2.46207  -1.17888   4.05479
C   -2.80640  -2.75847   3.10307
H   -3.59012  -3.34926   3.59178
H   -3.14897  -2.53371   2.08697
H   -1.90779  -3.37535   3.01115
C   -4.05195  -0.18232   4.24994
H   -4.70221  -0.63446   5.00855
H   -3.85752   0.85179   4.55505
H   -4.62499  -0.15743   3.31598
C   -1.61731  -1.47454   5.73799
C   -0.24269  -2.15216   5.53660
C   -1.41321  -0.12884   6.47172
C   -2.51060  -2.39525   6.60317
H   -0.33006  -3.12157   5.03265
H    0.43296  -1.52648   4.94383
H    0.23635  -2.33066   6.50976
H   -2.36428   0.37442   6.68186
H   -0.91254  -0.29431   7.43622
H   -0.78954   0.56009   5.89078
H   -2.03889  -2.56929   7.58028
H   -3.49720  -1.95693   6.79631
H   -2.66451  -3.37639   6.13855
C    0.78556  -1.27326   1.54577
O    0.20517  -2.33910   1.57800
O    2.10771  -1.10486   1.74922
C    2.86810  -2.31238   1.99548
H    2.93456  -2.90996   1.08539
H    3.85612  -1.96989   2.30259
H    2.40321  -2.89664   2.79206
N    0.86409   1.12058   1.51305
N    1.47382   2.06033   1.62878
H    6.84745   3.22216  -3.71999
H   -1.93990   6.98491  -4.14914
H   -4.75362  -0.16945  -6.01017
H    2.74434  -6.37201  -4.53330
Cl  -0.75433  -7.84081   3.52915
Cl   1.99659  -6.95726   2.24623
Cl  -3.46398  -6.96133   2.21328
Cl  -3.45909  -5.16021  -0.38311
Cl   6.14057  -3.33998  -0.23474
Cl   7.89733  -3.35175   2.39036
Cl   8.43879  -0.67837   3.94104
Cl   7.24716   2.04809   2.87434
Cl   3.47474   5.46929   0.88798
Cl   2.95371   7.00900   3.59810
Cl   0.02642   7.73299   4.46446
Cl  -2.41914   6.93759   2.62614
Cl  -7.53000  -2.20998   1.25856
Cl  -8.68904   0.34049   2.72250
Cl  -7.66539   3.20458   1.95192
Cl  -5.46439   3.55691  -0.28854
C    4.17784   3.28479  -4.07270
H    3.25295   2.88102  -4.48671
H    3.92300   4.14265  -3.43985
H    4.79124   3.65339  -4.90252
C   -2.17981   4.34410  -4.60700
H   -3.18081   4.19202  -4.18621
H   -2.28350   4.99461  -5.48267
H   -1.80081   3.37801  -4.94313
C   -3.35168  -2.36303  -5.15753
H   -3.83854  -2.52410  -6.12598
H   -2.35051  -1.97115  -5.34028
H   -3.25329  -3.33942  -4.66881
C    3.09013  -3.70151  -4.66149
H    3.33415  -4.25921  -5.57261
H    2.78278  -2.69516  -4.94997
H    4.00727  -3.62164  -4.06572
171
TS1-2 Rh2SiC67N6H60O19Cl16
Rh   0.13510   0.09434  -1.22182
Rh   0.25867   0.23635  -3.67033
N    1.22104  -4.47356  -1.51592
O   -0.99838  -4.11348  -2.11790
O    3.11423  -4.98325  -0.26386
C   -0.16987  -4.58546  -1.36432
C   -0.38332  -5.38562  -0.11243
C   -1.55728  -5.82204   0.48902
C   -1.44645  -6.56985   1.68536
C   -0.18195  -6.85178   2.24381
C    0.99853  -6.39015   1.61762
C    0.86799  -5.66238   0.44216
C    1.90931  -5.03299  -0.43158
N    4.78727   1.30212  -1.14503
O    4.58718  -0.88145  -1.92725
O    5.21456   3.12572   0.23827
C    5.02259  -0.07923  -1.12482
C    5.88950  -0.33040   0.07681
C    6.46772  -1.50574   0.54222
C    7.25210  -1.43518   1.71871
C    7.43174  -0.20719   2.39123
C    6.83364   0.97676   1.89893
C    6.07226   0.88574   0.74003
C    5.33539   1.94533  -0.02495
N   -1.04643   4.72488  -1.15481
O    1.22948   4.47492  -1.57284
O   -3.06456   5.15671  -0.07748
C    0.31813   4.89112  -0.88370
C    0.39134   5.65529   0.40753
C    1.49138   6.11937   1.11972
C    1.24822   6.82355   2.32346
C   -0.07031   7.03912   2.77808
C   -1.17450   6.55313   2.03912
C   -0.91407   5.86630   0.85970
C   -1.85254   5.23596  -0.12578
N   -4.50632  -1.05921  -1.77313
O   -4.14148   1.20914  -2.14467
O   -5.19390  -3.06292  -0.80415
C   -4.69255   0.30803  -1.54091
C   -5.67618   0.40542  -0.40926
C   -6.23797   1.51960   0.20369
C   -7.15786   1.29925   1.25699
C   -7.48323  -0.01175   1.66582
C   -6.89395  -1.13079   1.03116
C   -5.99570  -0.89218  -0.00174
C   -5.22118  -1.84982  -0.85858
O    0.99694  -1.79159  -1.40729
O    1.08688  -1.67636  -3.66906
O    2.04875   0.94934  -1.18732
O    2.14713   1.08306  -3.44638
O   -0.70058   2.01801  -1.24256
O   -0.59535   2.13150  -3.50394
O   -1.77687  -0.74307  -1.49513
O   -1.63190  -0.61288  -3.75263
C    1.25749  -2.26328  -2.56289
C    1.90409  -3.66790  -2.54139
H    2.89942  -3.49171  -2.11576
C    2.13243  -4.40986  -3.90267
C    2.74941  -5.79446  -3.59776
H    2.05089  -6.44889  -3.06536
H    3.66243  -5.71174  -2.99816
C    0.84188  -4.60941  -4.72237
H    0.36765  -3.65711  -4.96796
H    0.11057  -5.22427  -4.19016
H    1.08671  -5.12225  -5.66010
C    2.61405   1.26613  -2.28831
C    3.95971   2.01373  -2.13353
H    3.68201   2.94517  -1.62641
C    4.73336   2.42730  -3.43345
C    5.11105   1.23359  -4.33360
H    5.78736   0.53764  -3.82807
H    5.62953   1.60558  -5.22518
H    4.23075   0.67533  -4.65730
C    6.02865   3.16046  -3.01375
H    6.73046   2.49801  -2.49540
H    5.82245   4.01538  -2.36133
C   -0.88464   2.59739  -2.36688
C   -1.60527   3.96406  -2.28457
H   -2.61804   3.70437  -1.95376
C   -1.76962   4.79889  -3.60221
C   -2.48495   6.12414  -3.25095
H   -3.43834   5.95215  -2.74043
H   -1.86996   6.77062  -2.61547
C   -0.43109   5.12736  -4.29367
H    0.11412   4.22324  -4.57101
H    0.21983   5.73404  -3.65713
H   -0.62880   5.70219  -5.20613
C   -2.22278  -0.91676  -2.67703
C   -3.58962  -1.63959  -2.76981
H   -3.37891  -2.64511  -2.38707
C   -4.23188  -1.81995  -4.19062
C   -5.58713  -2.54726  -4.02850
H   -6.32391  -1.93786  -3.49388
H   -5.48145  -3.49813  -3.49656
H   -6.00315  -2.75938  -5.01934
C   -4.47605  -0.48647  -4.92613
H   -3.54916   0.06911  -5.07886
H   -5.17285   0.15821  -4.38152
C   -2.26139   0.70278   1.28452
C   -1.15114   0.16311   1.81900
H   -3.13510   0.90857   1.89546
H   -2.29597   0.94678   0.23249
C    0.05122  -0.09788   0.98244
O   -0.98378  -0.11517   3.14859
Si  -1.97590  -0.93994   4.27169
C   -2.37792  -2.63744   3.57932
H   -3.05866  -3.18071   4.24548
H   -2.87056  -2.55446   2.60395
H   -1.47755  -3.24170   3.43355
C   -3.56644   0.03326   4.55844
H   -4.07943  -0.32239   5.46017
H   -3.37850   1.10488   4.68761
H   -4.27063  -0.08941   3.72748
C   -0.89855  -0.99292   5.84272
C    0.46360  -1.65635   5.53663
C   -0.65462   0.44136   6.36669
C   -1.62542  -1.81591   6.93311
H    0.34919  -2.68438   5.17352
H    1.02643  -1.09329   4.78446
H    1.07668  -1.69807   6.44793
H   -1.58899   0.94334   6.64378
H   -0.02101   0.41479   7.26441
H   -0.14559   1.06485   5.62289
H   -1.01872  -1.84758   7.84867
H   -2.59514  -1.38220   7.20551
H   -1.79698  -2.85335   6.62255
C    0.86585  -1.26687   1.45550
O    0.35111  -2.36952   1.50067
O    2.15109  -1.00313   1.73957
C    2.96216  -2.14759   2.10838
H    3.11346  -2.79594   1.24408
H    3.90987  -1.72800   2.44556
H    2.48381  -2.70532   2.91579
N    1.05872   1.29671   1.46943
N    1.49466   2.31664   1.49237
H    6.53883   3.53483  -3.90780
H   -2.69244   6.67916  -4.17216
H   -4.91912  -0.69251  -5.90765
H    3.00939  -6.29242  -4.53816
Cl  -0.07083  -7.77081   3.71339
Cl   2.55856  -6.72709   2.30160
Cl  -2.88384  -7.14358   2.47151
Cl  -3.10599  -5.44609  -0.18450
Cl   6.23417  -3.01205  -0.28010
Cl   7.99710  -2.87454   2.33765
Cl   8.39482  -0.14514   3.83314
Cl   7.05164   2.49009   2.71738
Cl   3.10653   5.83449   0.56753
Cl   2.58798   7.42509   3.24718
Cl  -0.34355   7.90590   4.25633
Cl  -2.79835   6.81250   2.59130
Cl  -7.28761  -2.74469   1.52871
Cl  -8.61445  -0.25745   2.95840
Cl  -7.89004   2.65727   2.05051
Cl  -5.81556   3.12531  -0.28686
C    3.86375   3.43121  -4.22590
H    2.96090   2.96471  -4.62229
H    3.56358   4.28034  -3.60100
H    4.44308   3.82583  -5.06820
C   -2.68563   4.01500  -4.57117
H   -3.64214   3.76179  -4.09895
H   -2.90194   4.63614  -5.44767
H   -2.22017   3.09031  -4.91466
C   -3.31429  -2.73286  -5.03722
H   -3.80932  -2.96263  -5.98753
H   -2.35675  -2.25944  -5.25707
H   -3.11753  -3.68283  -4.52667
C    3.16154  -3.60712  -4.73221
H    3.41263  -4.16691  -5.64018
H    2.77336  -2.63163  -5.02905
H    4.09094  -3.44995  -4.17173
169
M1-2 Rh2SiC67N4H60O19Cl16
Rh   0.08759   0.09748  -1.25396
Rh   0.25472   0.27279  -3.71344
N    1.48375  -4.36640  -1.49425
O   -0.76283  -4.18636  -2.07745
O    3.42236  -4.68982  -0.24827
C    0.10650  -4.56572  -1.31709
C   -0.03752  -5.31872  -0.02708
C   -1.17326  -5.80173   0.61090
C   -1.00032  -6.48062   1.84004
C    0.28650  -6.65097   2.39305
C    1.42688  -6.14343   1.72909
C    1.23537  -5.48312   0.52256
C    2.22220  -4.82577  -0.39380
N    4.68899   1.54198  -1.10915
O    4.62823  -0.63565  -1.92870
O    5.01491   3.37011   0.29640
C    5.01405   0.17998  -1.11406
C    5.90116  -0.03497   0.07975
C    6.56291  -1.17624   0.51765
C    7.34126  -1.07699   1.69599
C    7.43341   0.14499   2.39657
C    6.75425   1.29527   1.92963
C    6.00032   1.17684   0.76823
C    5.19913   2.20151   0.01971
N   -1.26691   4.66682  -1.16278
O    1.02880   4.51366  -1.51325
O   -3.33340   4.98358  -0.13937
C    0.08273   4.86484  -0.83584
C    0.08517   5.57319   0.48836
C    1.14412   6.03566   1.26135
C    0.83535   6.68494   2.48094
C   -0.50490   6.84644   2.89215
C   -1.56569   6.35888   2.09358
C   -1.24174   5.72852   0.89846
C   -2.12351   5.10825  -0.14347
N   -4.47088  -1.25320  -1.82568
O   -4.21962   1.04933  -2.05678
O   -5.03813  -3.34570  -0.97437
C   -4.71009   0.08605  -1.49837
C   -5.66432   0.06346  -0.33800
C   -6.25486   1.10821   0.36378
C   -7.14020   0.77763   1.41776
C   -7.40297  -0.57098   1.74070
C   -6.78279  -1.61817   1.01861
C   -5.91996  -1.27148  -0.01395
C   -5.12518  -2.13433  -0.94904
O    1.02673  -1.74133  -1.44309
O    1.16818  -1.60706  -3.70089
O    1.96953   1.02374  -1.18832
O    2.09555   1.19809  -3.44595
O   -0.81153   1.99509  -1.30170
O   -0.67241   2.13608  -3.55891
O   -1.79270  -0.78210  -1.56634
O   -1.60841  -0.65003  -3.82089
C    1.34920  -2.18764  -2.59539
C    2.09192  -3.54306  -2.55164
H    3.07916  -3.28584  -2.14809
C    2.35006  -4.29847  -3.90006
C    3.04429  -5.64048  -3.57261
H    2.38566  -6.32198  -3.02371
H    3.95402  -5.49514  -2.97982
C    1.06557  -4.58241  -4.70393
H    0.54134  -3.66089  -4.96610
H    0.37068  -5.22166  -4.15237
H    1.32955  -5.10147  -5.63297
C    2.53029   1.38920  -2.27621
C    3.82567   2.21639  -2.09194
H    3.48379   3.11888  -1.57213
C    4.58365   2.69956  -3.37841
C    5.04388   1.54745  -4.29466
H    5.75872   0.88714  -3.79432
H    5.54567   1.96700  -5.17464
H    4.20363   0.94040  -4.63616
C    5.82740   3.50503  -2.93497
H    6.56552   2.87919  -2.42160
H    5.56327   4.33425  -2.27052
C   -0.99548   2.58083  -2.42428
C   -1.75979   3.92292  -2.33341
H   -2.77613   3.62476  -2.04754
C   -1.90225   4.78736  -3.63441
C   -2.66087   6.08527  -3.27234
H   -3.62443   5.87683  -2.79540
H   -2.08123   6.72963  -2.60253
C   -0.55088   5.16423  -4.27381
H    0.02314   4.28033  -4.55848
H    0.06600   5.76644  -3.60055
H   -0.73330   5.75935  -5.17635
C   -2.21229  -0.96658  -2.75906
C   -3.55597  -1.72588  -2.87761
H   -3.30588  -2.74965  -2.57277
C   -4.21827  -1.82664  -4.29837
C   -5.56950  -2.56580  -4.15915
H   -6.30218  -1.98688  -3.58636
H   -5.45506  -3.54281  -3.67866
H   -5.99537  -2.72854  -5.15503
C   -4.47336  -0.45363  -4.95282
H   -3.54744   0.10674  -5.09521
H   -5.15500   0.16203  -4.35833
C   -2.08710   1.03249   1.27548
C   -1.04871   0.26225   1.71801
H   -2.82619   1.42458   1.96891
H   -2.17436   1.28236   0.22696
C   -0.04186  -0.17732   0.79040
O   -0.87648  -0.03439   3.04197
Si  -1.83532  -0.93107   4.14019
C   -1.95653  -2.70293   3.53251
H   -2.59602  -3.29862   4.19481
H   -2.39859  -2.74182   2.53022
H   -0.97640  -3.18460   3.47049
C   -3.56305  -0.18163   4.22457
H   -4.15238  -0.67399   5.00764
H   -3.54895   0.89054   4.44912
H   -4.10887  -0.32548   3.28444
C   -0.89466  -0.75064   5.78529
C    0.56012  -1.24849   5.62472
C   -0.87322   0.73153   6.22563
C   -1.60198  -1.59561   6.87165
H    0.60531  -2.30119   5.32177
H    1.10739  -0.65730   4.88272
H    1.09640  -1.16063   6.57996
H   -1.88141   1.12356   6.40380
H   -0.31275   0.83893   7.16482
H   -0.38931   1.37064   5.47854
H   -1.07414  -1.49498   7.82997
H   -2.63728  -1.27504   7.03967
H   -1.61700  -2.66287   6.62096
C    0.96711  -1.09588   1.38177
O    0.69434  -2.28148   1.49265
O    2.12563  -0.52740   1.71761
C    3.12386  -1.42436   2.27299
H    3.43054  -2.15551   1.52223
H    3.95645  -0.78109   2.55588
H    2.72454  -1.93857   3.14952
H   -2.85495   6.65840  -4.18533
H   -4.93695  -0.60375  -5.93491
H    6.31992   3.92522  -3.81851
H    3.32774  -6.14109  -4.50480
Cl   3.01297  -6.34200   2.40676
Cl   0.47440  -7.48761   3.90359
Cl  -2.38802  -7.10745   2.67403
Cl  -2.75118  -5.56354  -0.06134
Cl  -7.09565  -3.27749   1.41255
Cl  -8.49323  -0.95206   3.03526
Cl  -7.90598   2.04605   2.32013
Cl  -5.90455   2.76015  -0.02101
Cl  -3.21622   6.54840   2.59435
Cl  -0.85857   7.64676   4.39090
Cl   2.12156   7.28497   3.47859
Cl   2.78591   5.80731   0.76609
Cl   6.86521   2.80120   2.78207
Cl   8.38928   0.24193   3.84152
Cl   8.18790  -2.47326   2.28193
Cl   6.43795  -2.67443  -0.34081
C    3.32679  -3.45732  -4.75449
H    3.59723  -4.01869  -5.65592
H    2.88472  -2.50871  -5.06300
H    4.25244  -3.24219  -4.20725
C   -3.31082  -2.68665  -5.20879
H   -3.81188  -2.85001  -6.16954
H   -2.35117  -2.20593  -5.40191
H   -3.11986  -3.67060  -4.76392
C   -2.76730   4.00740  -4.65203
H   -3.73540   3.72687  -4.22000
H   -2.96512   4.64299  -5.52243
H   -2.27135   3.09973  -4.99860
C    3.66150   3.66130  -4.16372
H    2.79485   3.14628  -4.58018
H    3.30090   4.47773  -3.52749
H    4.22460   4.10727  -4.99134
169
TS2-2 Rh2SiC67N4H60O19Cl16
C    0.21331   1.78166  -1.48909
C    0.71811   0.51950  -1.80720
H   -0.15158   2.43241  -2.28560
H    0.19481   2.15695  -0.47652
C   -0.19347  -0.08544  -0.95496
O    1.26521   0.05841  -2.91069
Si   2.10927   0.87074  -4.19983
C    3.12652   2.25998  -3.45073
H    3.78353   2.70009  -4.21019
H    2.49153   3.06757  -3.07051
H    3.75919   1.91446  -2.62654
C    0.79406   1.53656  -5.36363
H    1.25274   1.97984  -6.25539
H    0.10934   0.74974  -5.69724
H    0.19435   2.32116  -4.88815
C    3.15212  -0.52235  -4.95654
C    4.14697  -1.06481  -3.90442
C    2.23547  -1.67440  -5.43120
C    3.94075   0.03541  -6.16603
H    4.84499  -0.29232  -3.56130
H    3.62965  -1.47216  -3.02865
H    4.74646  -1.87489  -4.34116
H    1.53521  -1.34975  -6.20978
H    2.84351  -2.48301  -5.85904
H    1.65372  -2.10043  -4.60690
H    4.55143  -0.76056  -6.61277
H    3.27931   0.41438  -6.95428
H    4.62478   0.84387  -5.88120
C   -1.10745  -1.07176  -1.60659
O   -0.88250  -2.26667  -1.63920
O   -2.18636  -0.46434  -2.13621
C   -3.16054  -1.33209  -2.76825
H   -3.70959  -1.89257  -2.00970
H   -3.83589  -0.66394  -3.30297
H   -2.66926  -2.01723  -3.46212
Rh  -0.32595  -0.02592   1.23523
Rh  -0.52403  -0.03380   3.67893
N    3.46988  -2.90450   1.71793
O    3.97686  -0.68937   2.22403
O    3.39984  -4.97651   0.65642
C    4.15182  -1.69193   1.55846
C    5.11567  -1.90744   0.42553
C    6.05554  -1.04981  -0.13417
C    6.85392  -1.54665  -1.19161
C    6.68837  -2.86715  -1.66038
C    5.71752  -3.71861  -1.08328
C    4.94797  -3.21261  -0.04286
C    3.86291  -3.85869   0.76683
N   -3.10436  -3.84614   1.11159
O   -0.94927  -4.38805   1.80411
O   -4.99931  -3.57297  -0.21076
C   -1.85303  -4.47300   0.99656
C   -1.89550  -5.24036  -0.29278
C   -0.93891  -6.05139  -0.89033
C   -1.26741  -6.65628  -2.12700
C   -2.52384  -6.43189  -2.72759
C   -3.47700  -5.59344  -2.10557
C   -3.13670  -5.01248  -0.89079
C   -3.90653  -4.07263  -0.01356
N   -4.06701   2.90171   1.04743
O   -4.77408   0.72506   1.47736
O   -3.60383   4.90215  -0.04955
C   -4.74891   1.70904   0.76538
C   -5.41007   1.91957  -0.56741
C   -6.23844   1.08176  -1.30506
C   -6.72540   1.56059  -2.54493
C   -6.37214   2.84557  -3.00961
C   -5.52372   3.67864  -2.24367
C   -5.05966   3.19092  -1.02809
C   -4.15982   3.82130  -0.00626
N    2.62440   3.74949   1.66076
O    0.39834   4.38268   1.91399
O    4.76528   3.48033   0.78383
C    1.46461   4.46376   1.33519
C    1.82143   5.30953   0.14525
C    1.05686   6.22130  -0.57393
C    1.67567   6.89013  -1.65756
C    3.02183   6.62824  -1.99131
C    3.77747   5.68875  -1.25072
C    3.15182   5.04523  -0.18988
C    3.67194   4.01041   0.76407
O    1.09699  -1.55352   1.45195
O    0.89095  -1.55254   3.70936
O   -1.85990  -1.43865   1.21759
O   -2.02611  -1.46295   3.47728
O   -1.73761   1.51926   1.22682
O   -1.93227   1.49459   3.48499
O    1.20143   1.41127   1.46333
O    1.00430   1.37885   3.72005
C    1.38401  -1.96984   2.62076
C    2.38138  -3.15300   2.67834
H    1.82197  -3.98747   2.23923
C    2.87523  -3.63147   4.08977
C    3.88713  -4.78439   3.89358
H    4.80859  -4.44891   3.40527
H    3.46669  -5.60317   3.30115
C    3.55568  -2.51677   4.91017
H    2.88007  -1.68005   5.09625
H    4.44735  -2.12821   4.40876
H    3.87317  -2.92380   5.87754
C   -2.34757  -1.85511   2.31912
C   -3.48586  -2.89162   2.16548
H   -4.30561  -2.31758   1.71667
C   -4.06653  -3.55899   3.45960
C   -3.00658  -4.29905   4.30003
H   -2.54577  -5.12069   3.74414
H   -3.48625  -4.72810   5.18783
H   -2.21200  -3.62774   4.63132
C   -5.15811  -4.56839   3.03478
H   -4.74306  -5.41386   2.47559
H   -5.93136  -4.09887   2.41738
C   -2.22093   1.92903   2.33413
C   -3.19243   3.12733   2.21022
H   -2.54584   3.95567   1.89607
C   -3.94443   3.61488   3.49673
C   -4.87765   4.78223   3.10006
H   -4.33361   5.58744   2.59493
H   -5.69106   4.45604   2.44286
C   -4.78635   2.51441   4.17336
H   -4.17166   1.66584   4.47985
H   -5.57572   2.14062   3.51486
H   -5.26926   2.92867   5.06634
C    1.52740   1.77824   2.64219
C    2.73516   2.74335   2.73089
H    3.58661   2.12275   2.42671
C    3.09597   3.34684   4.13472
C    4.29404   4.30954   3.96283
H    4.03439   5.19396   3.37073
H    5.14928   3.81920   3.48666
H    4.61559   4.66468   4.94779
C    1.93188   4.12130   4.78568
H    1.05911   3.48499   4.94302
H    1.62239   4.97863   4.18030
H    4.16940  -5.18663   4.87261
H   -5.64296  -4.97683   3.92814
H   -5.33797   5.20153   4.00123
H    2.25577   4.50631   5.75981
Cl   5.50172  -5.34035  -1.65842
Cl   7.67984  -3.45366  -2.95887
Cl   8.04608  -0.51589  -1.91983
Cl   6.23027   0.57999   0.42463
Cl   5.43054   5.35835  -1.65672
Cl   3.75898   7.46090  -3.32347
Cl   0.76543   8.04147  -2.58302
Cl  -0.60208   6.51433  -0.17556
Cl  -5.08283   5.25905  -2.80882
Cl  -6.98080   3.41082  -4.53385
Cl  -7.76568   0.55328  -3.50188
Cl  -6.65252  -0.50142  -0.73861
Cl  -5.02319  -5.30447  -2.84256
Cl  -2.90502  -7.18648  -4.24498
Cl  -0.10774  -7.68250  -2.91150
Cl   0.61307  -6.29232  -0.16673
C    3.55339   2.19868   5.06462
H    2.74281   1.50323   5.28482
H    4.38005   1.63216   4.61982
H    3.91117   2.61957   6.01106
C    1.66798  -4.20247   4.87009
H    1.16632  -4.99474   4.30199
H    2.01902  -4.64047   5.81138
H    0.93190  -3.43285   5.10489
C   -4.74630  -2.46476   4.31549
H   -5.25046  -2.93178   5.16910
H   -4.02589  -1.74086   4.69904
H   -5.50526  -1.92194   3.73918
C   -2.90096   4.16740   4.49564
H   -3.41846   4.60810   5.35519
H   -2.23456   3.38563   4.86279
H   -2.28891   4.95408   4.03830
191
TS4-2-S Rh2SiC79N7H65O19Cl16
Rh   0.05353  -0.00053  -1.29986
Rh   0.26799   0.20312  -3.75900
N   -3.03473   3.73481  -1.49285
O   -0.84530   4.49232  -1.71764
O   -5.15661   3.32584  -0.62300
C   -1.92191   4.51497  -1.15481
C   -2.34328   5.34846   0.02251
C   -1.65258   6.32711   0.72804
C   -2.32597   6.97127   1.79403
C   -3.65345   6.62105   2.12181
C   -4.33520   5.61971   1.39166
C   -3.65674   5.00130   0.34873
C   -4.10096   3.92802  -0.60159
N   -3.68165  -2.93583  -2.21440
O   -4.25829  -0.75149  -2.77642
O   -3.55645  -4.96981  -1.08850
C   -4.45423  -1.76840  -2.14102
C   -5.52983  -2.04954  -1.12984
C   -6.59385  -1.26428  -0.70250
C   -7.46299  -1.80616   0.27492
C   -7.24567  -3.10030   0.79364
C   -6.15490  -3.88056   0.34416
C   -5.31640  -3.33184  -0.61837
C   -4.10007  -3.90029  -1.28871
N    3.09049  -3.63141  -1.40697
O    0.99584  -4.39735  -2.08049
O    4.96740  -3.18792  -0.10152
C    1.93037  -4.40720  -1.30301
C    2.09136  -5.22234  -0.05003
C    1.27585  -6.20440   0.49792
C    1.68286  -6.79859   1.71515
C    2.88456  -6.40374   2.34026
C    3.70730  -5.41268   1.75679
C    3.28615  -4.84096   0.56261
C    3.93024  -3.79055  -0.29473
N    4.08909   2.90896  -1.40166
O    4.63264   0.95150  -2.54085
O    4.03579   4.56692   0.23225
C    4.88566   1.79505  -1.70444
C    6.07179   1.87701  -0.78663
C    7.19715   1.06958  -0.69448
C    8.15997   1.38583   0.29271
C    7.97113   2.48848   1.15183
C    6.81803   3.29892   1.03796
C    5.88896   2.97232   0.05918
C    4.58514   3.62105  -0.29908
O   -1.50595   1.42101  -1.42661
O   -1.29354   1.58099  -3.67908
O   -1.31881  -1.54755  -1.70338
O   -1.10296  -1.34652  -3.95121
O    1.61092  -1.38197  -1.39848
O    1.80214  -1.20558  -3.65277
O    1.46445   1.58619  -1.19798
O    1.63026   1.72877  -3.45391
C   -1.83956   1.86443  -2.57673
C   -3.09890   2.76816  -2.60292
C   -3.51175   3.41259  -3.97520
C   -4.76923   4.28539  -3.75336
H   -4.56516   5.15702  -3.12169
H   -5.58777   3.71868  -3.29799
C   -2.40848   4.29353  -4.59576
H   -1.49783   3.72497  -4.79041
H   -2.14962   5.13974  -3.95192
H   -2.76801   4.70326  -5.54716
C   -1.56954  -1.88182  -2.90875
C   -2.48842  -3.12066  -3.05884
C   -2.81223  -3.62862  -4.50671
C   -3.53408  -2.58164  -5.37902
H   -4.50828  -2.30595  -4.96311
H   -3.71151  -3.00384  -6.37529
H   -2.94327  -1.67122  -5.49139
C   -3.71199  -4.88157  -4.39479
H   -4.69772  -4.64842  -3.97745
H   -3.25582  -5.66019  -3.77468
C    2.13559  -1.66740  -2.52562
C    3.35203  -2.61969  -2.44433
C    3.93898  -3.20354  -3.77753
C    5.09974  -4.15866  -3.41462
H    5.85488  -3.66564  -2.79280
H    4.75127  -5.05102  -2.88315
C    2.90623  -3.97436  -4.62433
H    2.06209  -3.34090  -4.90451
H    2.51365  -4.84955  -4.09916
H    3.38805  -4.32783  -5.54383
C    1.91797   2.09356  -2.28120
C    2.86015   3.31448  -2.10582
C    3.14646   4.19365  -3.37606
C    3.95184   5.43816  -2.93306
H    4.94725   5.17845  -2.55727
H    3.43418   6.00663  -2.15339
H    4.09619   6.09972  -3.79427
C    3.95087   3.45839  -4.46743
H    3.44751   2.55012  -4.80128
H    4.95392   3.18637  -4.12324
C    0.00282   1.97416   1.62916
C   -0.54356   0.69541   1.75073
H   -0.29480   2.76595   2.30724
H    0.50278   2.25137   0.70736
C   -0.30648  -0.27987   0.77679
O   -1.21684   0.38049   2.93164
Si  -2.85385   0.78196   3.22177
C   -3.89779   0.30484   1.73484
H   -4.89902   0.74431   1.81155
H   -3.45227   0.67203   0.80367
H   -3.99913  -0.78001   1.63811
C   -2.96757   2.64588   3.48965
H   -3.97934   2.93653   3.79662
H   -2.27202   3.00078   4.25814
H   -2.74854   3.19057   2.56442
C   -3.34283  -0.16750   4.80292
C   -2.98180  -1.66349   4.67061
C   -2.62069   0.41934   6.03625
C   -4.87124  -0.03328   5.00885
H   -3.48761  -2.13297   3.81938
H   -1.90426  -1.81074   4.54208
H   -3.28960  -2.20915   5.57394
H   -2.89186   1.46664   6.21221
H   -2.89365  -0.14419   6.93990
H   -1.53175   0.36671   5.93270
H   -5.17490  -0.55396   5.92772
H   -5.18744   1.01190   5.11185
H   -5.43996  -0.47429   4.18238
C   -0.48297  -1.68930   1.21017
O    0.48987  -2.34409   1.57389
O   -1.73251  -2.16732   1.16863
C   -1.88411  -3.55916   1.54141
H   -1.41648  -3.74900   2.50947
H   -2.95820  -3.73141   1.59830
H   -1.44389  -4.20030   0.77644
C    1.48075  -3.49016   5.70104
C    1.66464  -2.61975   4.64714
C    1.61194  -1.21662   4.88030
C    1.35605  -0.72229   6.19793
C    1.16816  -1.64066   7.25862
C    1.23354  -2.99952   7.01077
H    2.02401  -0.64316   2.82282
H    1.52404  -4.56331   5.53299
H    1.83497  -2.98198   3.63764
C    1.82088  -0.30077   3.83211
C    1.30583   0.68977   6.36242
H    0.97490  -1.26786   8.26196
H    1.09217  -3.70517   7.82611
C    1.51358   1.52732   5.30690
H    1.11067   1.12715   7.33790
H    1.50010   2.60548   5.40235
N    1.78908   1.02778   4.04121
C    2.03570   1.93642   2.94154
C    2.95688   1.45124   1.97507
N    3.69014   0.98807   1.19400
C    2.04817   3.32344   3.24357
N    1.97102   4.46499   3.48441
H    4.14034  -1.99488  -2.00831
H    2.34069   3.95737  -1.38822
H   -3.91204   2.08978  -2.31979
H   -1.93175  -3.92343  -2.56261
C   -3.90114   2.28215  -4.95676
H   -4.30182   2.72422  -5.87616
H   -3.04664   1.65861  -5.22097
H   -4.67677   1.63471  -4.53193
C    1.80331   4.69042  -3.95691
H    1.18851   5.17717  -3.19276
H    2.00202   5.42516  -4.74556
H    1.22043   3.87680  -4.39067
C    4.52932  -2.04170  -4.61036
H    5.25670  -1.46175  -4.03169
H    5.04536  -2.45190  -5.48615
H    3.75484  -1.35661  -4.95705
C   -1.49074  -4.06187  -5.18298
H   -1.71443  -4.53783  -6.14444
H   -0.83052  -3.21357  -5.36779
H   -0.94813  -4.79057  -4.56938
H   -3.87598  -5.29939  -5.39404
H   -5.11943   4.66438  -4.71954
H    4.07509   4.12431  -5.32978
H    5.59122  -4.49921  -4.33248
Cl   9.58770   0.40902   0.44338
Cl   7.43026  -0.28135  -1.75672
Cl   9.16511   2.85927   2.35830
Cl   6.57778   4.65776   2.09073
Cl  -0.02300   6.75102   0.32324
Cl  -1.50985   8.20365   2.70056
Cl  -4.45953   7.42418   3.43227
Cl  -5.96649   5.18344   1.78883
Cl  -5.88013  -5.47372   0.97698
Cl  -8.32364  -3.74361   1.99265
Cl  -8.80740  -0.86570   0.83939
Cl  -6.84825   0.32763  -1.33039
Cl   5.19432  -4.93275   2.51144
Cl  -0.19331  -6.69518  -0.28270
Cl   0.69193  -8.02475   2.44442
Cl   3.36365  -7.14478   3.83778
191
M3-2-S Rh2SiC79N7H65O19Cl16
C    1.70435  -1.59811   1.53928
C    1.08363  -0.26964   1.87927
H    2.79645  -1.58705   1.61470
H    1.44903  -1.88747   0.52255
C    0.27835   0.40220   1.03364
O    1.29640   0.08406   3.21263
Si   2.50048   1.09378   3.88563
C    2.76465   2.62995   2.83487
H    3.67255   3.14402   3.17381
H    2.90930   2.35503   1.78463
H    1.93230   3.33542   2.87340
C    4.15461   0.19198   3.94823
H    4.92602   0.86738   4.33860
H    4.14631  -0.70297   4.57572
H    4.48325  -0.10301   2.94386
C    1.83434   1.49313   5.62876
C    0.52501   2.30833   5.52442
C    1.55023   0.18923   6.40821
C    2.88823   2.32337   6.39932
H    0.68567   3.27975   5.04205
H   -0.24559   1.77442   4.95768
H    0.12290   2.50889   6.52792
H    2.44490  -0.43469   6.51603
H    1.19002   0.42372   7.42028
H    0.77839  -0.41152   5.91422
H    2.50873   2.58427   7.39735
H    3.82486   1.77204   6.54315
H    3.12731   3.26453   5.88928
C   -0.54649   1.51288   1.56390
O   -1.62357   1.33312   2.12429
O   -0.04706   2.74751   1.33079
C   -0.85930   3.84820   1.78583
H   -0.88531   3.87724   2.87941
H   -0.39180   4.74735   1.38490
H   -1.87986   3.74942   1.41195
C   -4.65341  -1.11295   2.01977
C   -3.35985  -1.34407   1.60083
C   -2.42579  -1.91809   2.50515
C   -2.81802  -2.22957   3.84566
C   -4.15409  -1.99571   4.24240
C   -5.05052  -1.45082   3.33915
H   -0.79619  -2.02796   1.07267
H   -5.36483  -0.64295   1.34734
H   -3.02815  -1.04727   0.60956
C   -1.09756  -2.15744   2.10517
C   -1.82264  -2.75481   4.71768
H   -4.46258  -2.23414   5.25761
H   -6.07611  -1.26113   3.64821
C   -0.54041  -2.91793   4.28855
H   -2.06499  -3.01652   5.74388
H    0.24520  -3.29173   4.93175
N   -0.18764  -2.61350   2.98299
C    1.23629  -2.76435   2.52397
C    1.39350  -4.05755   1.81926
N    1.57288  -5.05685   1.25596
C    2.13270  -2.83070   3.69858
N    2.88048  -2.95601   4.57763
Rh   0.08598   0.08830  -1.11745
Rh  -0.02421  -0.13495  -3.59356
N    2.08929   4.38652  -1.75320
O    3.72670   2.81837  -2.28031
O    0.85626   5.99348  -0.60456
C    3.32353   3.74249  -1.60222
C    4.00749   4.42404  -0.45113
C    5.27174   4.22907   0.09132
C    5.65056   5.03633   1.19005
C    4.76521   6.00430   1.71001
C    3.48383   6.18628   1.14016
C    3.13334   5.38501   0.06105
C    1.87370   5.34333  -0.75268
N   -4.24416   2.24398  -1.37649
O   -2.64425   3.76790  -2.11087
O   -5.84456   1.17616  -0.06974
C   -3.55344   3.46431  -1.36494
C   -4.16769   4.27156  -0.25562
C   -3.91590   5.57446   0.15801
C   -4.66393   6.07625   1.25009
C   -5.63096   5.27195   1.88996
C   -5.87356   3.95048   1.44763
C   -5.13030   3.47805   0.37348
C   -5.16432   2.15351  -0.32750
N   -2.46386  -4.13427  -1.14775
O   -3.80458  -2.60087  -2.27741
O   -1.66921  -5.55293   0.52022
C   -3.65907  -3.45650  -1.42749
C   -4.66863  -3.97450  -0.44229
C   -6.02473  -3.70264  -0.31265
C   -6.72651  -4.32938   0.74430
C   -6.05962  -5.19915   1.63368
C   -4.67973  -5.46788   1.47755
C   -4.01248  -4.84680   0.42890
C   -2.57813  -4.93635  -0.00031
N    4.48495  -2.09484  -1.59318
O    3.03793  -3.72741  -2.40406
O    5.97422  -0.95304  -0.21218
C    3.94108  -3.38449  -1.66759
C    4.67493  -4.20293  -0.64409
C    4.60341  -5.56058  -0.35582
C    5.41895  -6.05595   0.68932
C    6.27893  -5.19279   1.40194
C    6.34972  -3.81746   1.07733
C    5.53906  -3.35111   0.04917
C    5.41043  -1.97757  -0.54442
O    0.73224   2.04294  -1.45934
O    0.57140   1.86106  -3.71625
O   -1.93384   0.72758  -1.21296
O   -1.99753   0.50909  -3.47193
O   -0.60584  -1.92549  -1.01194
O   -0.64952  -2.11094  -3.27057
O    2.08937  -0.57942  -1.29831
O    1.97994  -0.71015  -3.55997
C    0.78407   2.50053  -2.64653
C    1.04915   4.02474  -2.73101
H    0.13517   4.46446  -2.31447
C    1.24701   4.67455  -4.14467
C    1.52876   6.18272  -3.95104
H    2.48965   6.36441  -3.45720
H    0.74533   6.67254  -3.36280
C    2.40206   4.05371  -4.95571
H    2.24919   2.98564  -5.12129
H    3.36805   4.18465  -4.45966
H    2.46226   4.54788  -5.93287
C   -2.50951   0.78315  -2.35207
C   -4.01778   1.13948  -2.32237
H   -4.48296   0.27560  -1.83441
C   -4.76764   1.32107  -3.69247
C   -4.15451   2.40943  -4.59706
H   -4.20715   3.40228  -4.14131
H   -4.71561   2.44962  -5.53833
H   -3.10955   2.19863  -4.83078
C   -6.23862   1.69691  -3.39572
H   -6.33078   2.68450  -2.93040
H   -6.72489   0.96522  -2.74157
C   -0.80521  -2.56399  -2.10912
C   -1.21429  -4.05116  -1.93167
H   -0.45669  -4.46128  -1.25534
C   -1.21835  -4.97135  -3.20255
C   -1.53328  -6.41629  -2.74889
H   -0.83265  -6.76790  -1.98395
H   -2.54976  -6.51636  -2.35179
C   -2.24795  -4.55596  -4.27332
H   -2.09767  -3.52710  -4.60342
H   -3.27782  -4.65366  -3.91579
H   -2.14376  -5.21690  -5.14187
C    2.59422  -0.75585  -2.45967
C    4.13190  -0.96297  -2.46998
H    4.51200  -0.08711  -1.93312
C    4.87058  -0.99146  -3.85425
C    6.38961  -1.10335  -3.58452
H    6.66078  -2.05810  -3.12025
H    6.75080  -0.29631  -2.93804
H    6.93279  -1.04183  -4.53378
C    4.44531  -2.15698  -4.77061
H    3.37117  -2.14865  -4.96263
H    4.70878  -3.13170  -4.34927
H    1.57016   6.67345  -4.92959
H   -6.79993   1.73093  -4.33565
H   -1.45792  -7.09050  -3.60879
H    4.96878  -2.06518  -5.72983
Cl   2.39018   7.37641   1.77230
Cl   5.24971   6.98091   3.06121
Cl   7.21929   4.83039   1.90355
Cl   6.35444   3.03724  -0.54853
Cl   7.42122  -2.75489   1.93241
Cl   7.26779  -5.82214   2.68157
Cl   5.36282  -7.74217   1.09222
Cl   3.57834  -6.62242  -1.26059
Cl  -3.85377  -6.54072   2.56164
Cl  -6.93757  -5.94944   2.92851
Cl  -8.42117  -4.02095   0.94816
Cl  -6.84031  -2.63668  -1.40877
Cl  -7.07075   2.96112   2.22217
Cl  -6.53441   5.90784   3.22825
Cl  -4.38574   7.69657   1.80443
Cl  -2.72207   6.55204  -0.62646
C    4.62050   0.35290  -4.57579
H    3.57835   0.46254  -4.87917
H    4.88014   1.20611  -3.94116
H    5.24500   0.39926  -5.47535
C   -0.07655   4.54333  -4.93430
H   -0.91796   4.97088  -4.37665
H    0.00942   5.09006  -5.88036
H   -0.31216   3.50260  -5.16069
C   -4.77617  -0.03340  -4.43916
H   -5.39493   0.05682  -5.33944
H   -3.77377  -0.33782  -4.74126
H   -5.19892  -0.83127  -3.81928
C    0.20094  -4.96908  -3.81383
H    0.24535  -5.71097  -4.61932
H    0.46483  -3.99716  -4.23274
H    0.96338  -5.23430  -3.07417
191
TS5-2-S Rh2SiC79N7H65O19Cl16
C   -0.74848   2.25307   1.75790
C   -0.97238   0.79059   1.99377
H   -1.64587   2.85122   1.91640
H   -0.39269   2.41911   0.74480
C   -0.10012  -0.11116   1.43318
O   -1.80930   0.48033   3.00352
Si  -3.45474   0.63212   3.46202
C   -4.44593  -0.37295   2.22917
H   -5.51300  -0.36453   2.47972
H   -4.33327   0.05857   1.22859
H   -4.10187  -1.40996   2.18616
C   -4.00924   2.42732   3.39710
H   -5.04339   2.50056   3.75675
H   -3.40157   3.08985   4.02157
H   -4.01279   2.82283   2.37478
C   -3.49485  -0.08288   5.22651
C   -3.06241  -1.56697   5.21492
C   -2.54407   0.70937   6.15225
C   -4.93901   0.01960   5.77458
H   -3.72863  -2.18643   4.60330
H   -2.04204  -1.68919   4.83630
H   -3.08703  -1.97338   6.23569
H   -2.80239   1.77284   6.20592
H   -2.59349   0.30802   7.17418
H   -1.50284   0.63251   5.82019
H   -4.98774  -0.40911   6.78490
H   -5.28267   1.05797   5.84803
H   -5.65877  -0.53114   5.15674
C   -0.19586  -1.51285   1.93136
O    0.65749  -2.08639   2.59365
O   -1.34954  -2.11427   1.55523
C   -1.50218  -3.48629   1.97084
H   -1.61685  -3.54642   3.05703
H   -2.39661  -3.85150   1.46657
H   -0.63161  -4.07432   1.67356
C    4.37804  -1.69520   1.57186
C    3.38612  -0.76585   1.29024
C    2.72747  -0.09410   2.33646
C    3.08403  -0.37187   3.68254
C    4.09038  -1.32091   3.95023
C    4.72960  -1.97580   2.90596
H    1.76160   1.38845   1.08644
H    4.86863  -2.23010   0.76522
H    3.08249  -0.57951   0.26623
C    1.68764   0.88489   2.04221
C    2.41868   0.35231   4.73206
H    4.35877  -1.53459   4.98289
H    5.50061  -2.71388   3.11567
C    1.57007   1.36002   4.42899
H    2.61490   0.12366   5.77525
H    1.08562   1.95869   5.18982
N    1.32284   1.71880   3.10407
C    0.37687   2.78885   2.77307
C    1.07137   3.92606   2.11827
N    1.56547   4.83631   1.59288
C   -0.27948   3.34437   3.97759
N   -0.83733   3.83033   4.87245
Rh   0.05611  -0.04098  -0.98893
Rh   0.16553   0.00579  -3.44394
N   -4.18278  -2.43214  -1.65842
O   -4.54886  -0.26532  -2.42190
O   -4.27529  -4.35760  -0.35138
C   -4.87517  -1.21836  -1.74206
C   -6.05523  -1.35220  -0.82192
C   -7.10366  -0.47767  -0.56619
C   -8.09102  -0.88256   0.36323
C   -8.00088  -2.13559   1.00668
C   -6.92265  -3.00949   0.73212
C   -5.96807  -2.59348  -0.18731
C   -4.73448  -3.28379  -0.69044
N    2.31908  -4.32082  -1.24091
O    0.07869  -4.57187  -1.81610
O    4.34957  -4.47999  -0.11491
C    1.03689  -4.87261  -1.13105
C    1.11482  -5.87527  -0.01457
C    0.15502  -6.74850   0.48374
C    0.52303  -7.59157   1.55933
C    1.82557  -7.54081   2.09984
C    2.78909  -6.65019   1.57128
C    2.40694  -5.83269   0.51516
C    3.19106  -4.81944  -0.26177
N    4.46961   2.11037  -1.22482
O    4.72854  -0.02052  -2.12352
O    4.62121   3.93110   0.22039
C    5.08431   0.86053  -1.36367
C    6.21088   0.84192  -0.37023
C    7.19273  -0.11249  -0.13632
C    8.12592   0.13684   0.89678
C    8.05332   1.32170   1.66011
C    7.05323   2.28671   1.39655
C    6.15117   2.02313   0.37295
C    5.01681   2.84753  -0.15780
N   -2.18637   4.28402  -1.44348
O   -0.05723   4.66991  -2.29616
O   -4.01329   4.27028  -0.00047
C   -0.96209   4.96221  -1.54016
C   -1.01335   6.05428  -0.51329
C   -0.10930   7.07221  -0.23685
C   -0.42251   7.96325   0.81716
C   -1.61802   7.81510   1.55290
C   -2.53027   6.77819   1.24468
C   -2.20433   5.91494   0.20530
C   -2.95761   4.75094  -0.36864
O   -1.62223  -1.29514  -1.24249
O   -1.43449  -1.29683  -3.50085
O    1.30997  -1.74038  -1.09055
O    1.43115  -1.62703  -3.35018
O    1.76154   1.22718  -1.02840
O    1.79314   1.28850  -3.28903
O   -1.19779   1.65465  -1.16943
O   -1.14166   1.62080  -3.43258
C   -1.94723  -1.68455  -2.40887
C   -3.01268  -2.80892  -2.46892
H   -2.55072  -3.62912  -1.90855
C   -3.39957  -3.38826  -3.87812
C   -4.43212  -4.52183  -3.67225
H   -5.38551  -4.15202  -3.27906
H   -4.06095  -5.29655  -2.99330
C   -4.00677  -2.34132  -4.83457
H   -3.32757  -1.50414  -5.00354
H   -4.95351  -1.94081  -4.45936
H   -4.21494  -2.81698  -5.80031
C    1.71893  -2.14000  -2.23032
C    2.73699  -3.30850  -2.22312
H    3.63956  -2.86827  -1.78338
C    3.17534  -3.91253  -3.60827
C    1.99659  -4.44280  -4.44945
H    1.46632  -5.25640  -3.94580
H    2.38158  -4.83829  -5.39684
H    1.27420  -3.65723  -4.67633
C    4.15517  -5.08064  -3.34713
H    3.67148  -5.92630  -2.84619
H    5.01263  -4.77060  -2.74131
C    2.23125   1.61888  -2.15419
C    3.39193   2.64347  -2.07712
H    2.97827   3.47133  -1.48980
C    3.91459   3.26763  -3.42132
C    5.01133   4.30316  -3.07774
H    4.65297   5.06271  -2.37509
H    5.90533   3.83734  -2.64864
C    4.50685   2.23327  -4.40063
H    3.78393   1.45858  -4.66087
H    5.39834   1.74480  -3.99583
H    4.80820   2.74691  -5.32119
C   -1.54710   2.07199  -2.32573
C   -2.62680   3.18377  -2.31827
H   -3.46019   2.73070  -1.76974
C   -3.21292   3.67164  -3.69034
C   -4.30536   4.72612  -3.39482
H   -3.89342   5.63989  -2.95252
H   -5.07652   4.33874  -2.72005
H   -4.79415   5.01456  -4.33157
C   -2.16646   4.29692  -4.63540
H   -1.34987   3.60550  -4.85002
H   -1.73552   5.21530  -4.22649
H   -4.64587  -4.99473  -4.63681
H    4.53647  -5.45036  -4.30498
H    5.32515   4.81391  -3.99439
H   -2.65387   4.55892  -5.58194
Cl  -6.80421  -4.55036   1.51936
Cl  -9.22147  -2.61151   2.14467
Cl  -9.42258   0.17321   0.71299
Cl  -7.20665   1.06226  -1.35581
Cl  -4.00987   6.60110   2.13214
Cl  -1.98001   8.91706   2.84274
Cl   0.67427   9.24818   1.20428
Cl   1.34213   7.26282  -1.15874
Cl   6.96328   3.75076   2.32067
Cl   9.20294   1.60359   2.92863
Cl   9.36929  -1.02722   1.22717
Cl   7.28580  -1.56158  -1.08450
Cl   4.39563  -6.59143   2.22198
Cl   2.25354  -8.58159   3.42042
Cl  -0.64141  -8.69704   2.21698
Cl  -1.44287  -6.80776  -0.18369
C   -3.89455   2.47415  -4.39045
H   -3.17201   1.71591  -4.69620
H   -4.63335   1.99255  -3.74183
H   -4.41474   2.83098  -5.28660
C   -2.14345  -4.01955  -4.52173
H   -1.67258  -4.74704  -3.85233
H   -2.43437  -4.54506  -5.43845
H   -1.39819  -3.26752  -4.78244
C    3.94664  -2.83243  -4.40293
H    4.36161  -3.28186  -5.31225
H    3.30382  -2.00162  -4.69486
H    4.78130  -2.42632  -3.82017
C    2.75448   4.02877  -4.10254
H    3.14437   4.57234  -4.97066
H    1.96932   3.35533  -4.44855
H    2.29782   4.75898  -3.42691
67
COM1-3 Rh2SiC19N2H20O11F12
Rh   0.63159  -0.02013  -0.08815
Rh   3.02364  -0.33196   0.43239
O    0.72863   1.72574   1.06077
O    2.93243   1.42021   1.55625
O    1.23984   1.06137  -1.76759
O    3.44883   0.78808  -1.28168
O    0.74590  -1.77369  -1.21617
O    2.95361  -2.06803  -0.72987
O    0.23065  -1.12282   1.64046
O    2.44202  -1.42114   2.11045
C    1.82821   2.02355   1.60821
C    2.48166   1.21181  -1.96438
C    1.86047  -2.37210  -1.27276
C    1.20652  -1.55395   2.31837
C   -2.32301  -2.06539  -0.03181
C   -2.66641  -0.82521  -0.39373
H   -3.07519  -2.83597   0.10510
H   -1.29166  -2.33165   0.14440
C   -1.66223   0.29495  -0.63245
O   -3.92989  -0.38962  -0.66689
Si  -5.43059  -0.74755   0.08268
C   -5.21595  -0.60114   1.94160
H   -6.15555  -0.82622   2.46003
H   -4.46366  -1.30909   2.30670
H   -4.88862   0.40050   2.23701
C   -5.95611  -2.49509  -0.39086
H   -7.02094  -2.65279  -0.18150
H   -5.79583  -2.69296  -1.45642
H   -5.40562  -3.25355   0.17707
C   -6.60489   0.55878  -0.65666
C   -6.06083   1.98157  -0.39482
C   -6.74415   0.34322  -2.18167
C   -7.99780   0.42331   0.00417
H   -5.95087   2.19221   0.67510
H   -5.08511   2.13420  -0.86851
H   -6.75060   2.73114  -0.80764
H   -7.17170  -0.63716  -2.42196
H   -7.41061   1.10353  -2.61267
H   -5.77885   0.42344  -2.69441
H   -8.69042   1.16196  -0.42234
H   -8.44260  -0.56563  -0.15946
H   -7.96162   0.60070   1.08553
C   -1.99337   1.58690   0.08942
O   -2.43625   1.59720   1.21629
O   -1.71689   2.66784  -0.65807
C   -1.93086   3.95161  -0.01642
H   -1.30406   4.03056   0.87257
H   -1.64345   4.69335  -0.76106
H   -2.98305   4.06181   0.25470
N   -1.54521   0.49487  -1.99899
N   -1.38075   0.60190  -3.10341
C    1.78672   3.30616   2.48732
F    1.15954   4.30645   1.83545
F    1.10517   3.05232   3.62260
F    3.01609   3.72309   2.81438
C    0.79600  -2.37134   3.57661
F    0.01953  -1.62518   4.38361
F    0.09166  -3.46017   3.20101
F    1.86387  -2.78048   4.27363
C    1.84342  -3.66456  -2.13793
F    1.46092  -3.37125  -3.39681
F    3.04678  -4.24795  -2.18536
F    0.96139  -4.54672  -1.62474
C    2.82831   2.04631  -3.23017
F    2.34171   3.29772  -3.09862
F    4.14940   2.12413  -3.42796
F    2.26500   1.48881  -4.32023
67 
TS1-3 Rh2SiC19N2H20O11F12
Rh   0.59877  -0.02964  -0.04578
Rh   3.05811  -0.31051   0.22714
O    0.75433   1.58729   1.26874
O    3.00299   1.31657   1.54013
O    1.03948   1.25482  -1.63619
O    3.29188   1.00694  -1.38382
O    0.65648  -1.65010  -1.36379
O    2.90947  -1.91510  -1.11538
O    0.39689  -1.33383   1.57711
O    2.64985  -1.59822   1.82021
C    1.89214   1.86927   1.74522
C    2.25556   1.47029  -1.92044
C    1.77913  -2.19629  -1.58509
C    1.44442  -1.79995   2.11432
C   -2.26401  -2.10364   0.04199
C   -2.59536  -0.82732  -0.21939
H   -3.02162  -2.87553   0.13634
H   -1.23325  -2.38858   0.19187
C   -1.56858   0.24645  -0.27004
O   -3.85559  -0.36947  -0.47141
Si  -5.37883  -0.79910   0.19459
C   -5.22095  -0.78058   2.06488
H   -6.17231  -1.05040   2.53844
H   -4.47203  -1.50488   2.40468
H   -4.91521   0.20136   2.43958
C   -5.86384  -2.51513  -0.41677
H   -6.93600  -2.69111  -0.26833
H   -5.65399  -2.64179  -1.48457
H   -5.33632  -3.30796   0.12552
C   -6.54439   0.54278  -0.49033
C   -6.02164   1.95010  -0.12257
C   -6.64062   0.42477  -2.02928
C   -7.95289   0.35296   0.12259
H   -5.94035   2.09123   0.96137
H   -5.03697   2.14232  -0.56201
H   -6.70937   2.71871  -0.50213
H   -7.05258  -0.54111  -2.34379
H   -7.30216   1.20627  -2.42849
H   -5.66277   0.54534  -2.50938
H   -8.64179   1.10998  -0.27658
H   -8.38226  -0.62801  -0.11395
H   -7.94776   0.46356   1.21334
C   -1.99690   1.51932   0.41481
O   -2.35303   1.47232   1.57567
O   -1.85471   2.63046  -0.31782
C   -2.10356   3.87977   0.37960
H   -1.41198   3.97737   1.21783
H   -1.92899   4.65874  -0.36189
H   -3.13464   3.90943   0.73801
N   -1.68715   0.68422  -1.99447
N   -1.57719   0.73636  -3.09560
C    1.88890   3.05542   2.75176
F    1.10766   4.05959   2.30583
F    1.39922   2.63733   3.93741
F    3.12208   3.53949   2.95055
C    1.16599  -2.76369   3.30324
F    0.48656  -2.12165   4.27272
F    0.41546  -3.80479   2.88230
F    2.29879  -3.24739   3.82830
C    1.71065  -3.38579  -2.58505
F    1.21218  -2.96752  -3.76679
F    2.91534  -3.92632  -2.80207
F    0.89389  -4.34569  -2.10220
C    2.46159   2.46951  -3.09434
F    3.74198   2.52980  -3.47854
F    1.71447   2.10823  -4.15640
F    2.07329   3.70475  -2.70986
65
M1-3 Rh2SiC19H20O11F12
Rh  -0.50858  -0.01704  -0.09381
Rh  -2.91371   0.42189   0.43902
O   -0.33649  -0.73664   1.85560
O   -2.52921  -0.33949   2.34789
O   -1.10996  -1.91420  -0.72232
O   -3.30730  -1.51830  -0.24813
O   -0.91448   0.76192  -1.99377
O   -3.11196   1.14969  -1.51843
O   -0.11509   1.91888   0.59266
O   -2.30612   2.32377   1.08764
C   -1.36157  -0.73036   2.59937
C   -2.34020  -2.21059  -0.65081
C   -2.09449   1.15201  -2.25180
C   -1.08843   2.61577   1.01497
C    2.13975   1.65247  -1.54229
C    2.50655   0.47345  -0.94855
H    2.87055   2.24482  -2.08757
H    1.11330   1.99098  -1.52224
C    1.47595  -0.42096  -0.52397
O    3.79487   0.03797  -0.94719
Si   5.09810   0.58669   0.03671
C    4.61900   0.33183   1.83272
H    5.44040   0.61897   2.50005
H    3.75639   0.95437   2.09881
H    4.34912  -0.70698   2.04547
C    5.35897   2.42102  -0.29948
H    6.21209   2.79866   0.27705
H    5.55567   2.63224  -1.35627
H    4.48708   3.01098   0.00756
C    6.55750  -0.48649  -0.54078
C    6.23805  -1.98297  -0.31938
C    6.83373  -0.24488  -2.04297
C    7.81702  -0.11010   0.27625
H    6.05118  -2.21513   0.73522
H    5.36004  -2.29777  -0.89373
H    7.08626  -2.60073  -0.64562
H    7.11043   0.79562  -2.24971
H    7.66891  -0.87520  -2.37855
H    5.96429  -0.49263  -2.66200
H    8.67107  -0.72011  -0.04829
H    8.10170   0.94032   0.14121
H    7.68321  -0.28761   1.34996
C    1.90774  -1.82378  -0.27707
O    2.27591  -2.13836   0.84157
O    1.80837  -2.61491  -1.34031
C    2.11836  -4.01976  -1.12517
H    1.43161  -4.44021  -0.38809
H    1.97974  -4.49200  -2.09668
H    3.14950  -4.12842  -0.78299
C   -1.10731  -1.30604   4.02258
F   -0.78805  -2.61360   3.93628
F   -0.08395  -0.65941   4.61281
F   -2.18911  -1.18701   4.80425
C   -0.67323   4.03407   1.50081
F    0.20414   3.93609   2.51973
F   -0.07212   4.70545   0.49418
F   -1.72563   4.74864   1.91434
C   -2.26515   1.70888  -3.69426
F   -1.97949   0.75003  -4.59731
F   -3.51079   2.14361  -3.91647
F   -1.41363   2.73857  -3.89216
C   -2.66880  -3.64271  -1.16234
F   -1.86736  -4.54988  -0.56830
F   -3.94095  -3.97895  -0.91741
F   -2.45990  -3.70798  -2.49447
65
TS2-3 Rh2SiC19H20O11F12
Rh   0.56495  -0.00557  -0.16301
Rh   2.73695   0.48031   0.94844
O    1.48392  -1.68299  -0.99975
O    3.47857  -1.24169   0.01582
O    0.06882  -1.11099   1.54041
O    2.06793  -0.68125   2.55438
O   -0.18282   1.71948   0.75651
O    1.80359   2.16147   1.78931
O    1.23180   1.17406  -1.75468
O    3.23374   1.60587  -0.74931
C    2.69897  -1.89943  -0.71966
C    0.91887  -1.18703   2.47411
C    0.59974   2.37853   1.50478
C    2.38679   1.68993  -1.67327
C   -2.03368   1.24183  -1.84315
C   -2.51249   0.22866  -1.01844
H   -1.11741   1.77611  -1.63679
H   -2.58990   1.51744  -2.74043
C   -1.32168  -0.49544  -1.06140
O   -3.72995  -0.23827  -0.86119
Si  -5.28476   0.55311  -0.97886
C   -5.73215   0.60125  -2.80110
H   -6.76690   0.93731  -2.93700
H   -5.09494   1.29861  -3.35677
H   -5.63778  -0.38373  -3.27032
C   -5.09269   2.27809  -0.26456
H   -6.06793   2.77687  -0.21470
H   -4.67623   2.26107   0.74812
H   -4.44343   2.90852  -0.88191
C   -6.40083  -0.58803   0.04721
C   -6.40961  -2.00924  -0.56328
C   -5.88694  -0.66164   1.50413
C   -7.84128  -0.02080   0.04087
H   -6.80226  -2.01740  -1.58673
H   -5.40773  -2.45198  -0.58073
H   -7.05127  -2.66919   0.03615
H   -5.89536   0.31817   1.99561
H   -6.53223  -1.32595   2.09475
H   -4.86777  -1.05931   1.55929
H   -8.50071  -0.67151   0.63056
H   -7.89660   0.98027   0.48500
H   -8.26344   0.03389  -0.96973
C   -1.40024  -1.85641  -1.69070
O   -1.37541  -2.02089  -2.89567
O   -1.46312  -2.81629  -0.76284
C   -1.43427  -4.18038  -1.26080
H   -0.50407  -4.35562  -1.80458
H   -1.48755  -4.80760  -0.37161
H   -2.28972  -4.36094  -1.91539
C   -0.05675   3.63396   2.14682
F   -1.11207   3.26820   2.90372
F    0.80246   4.30985   2.91851
F   -0.50412   4.46461   1.18044
C    2.78168   2.54425  -2.91158
F    2.81095   1.77250  -4.01604
F    1.86934   3.52100  -3.10667
F    3.98320   3.11523  -2.76174
C    3.29723  -3.15403  -1.41798
F    4.48745  -3.48974  -0.90325
F    2.46786  -4.20937  -1.28959
F    3.45822  -2.90507  -2.73462
C    0.44845  -2.04401   3.68417
F    0.25197  -3.32108   3.29391
F    1.34732  -2.04134   4.67725
F   -0.71779  -1.56925   4.16647
65 
M2-3 Rh2SiC19H20O11F12
Rh   0.55704  -0.01590  -0.28253
Rh   2.04294   0.67535   1.57107
O    1.98777  -1.47017  -0.73197
O    3.35327  -0.83691   0.98060
O   -0.36516  -1.31934   1.06188
O    1.00898  -0.69165   2.77233
O   -0.74858   1.51526   0.31737
O    0.62374   2.14626   2.02647
O    1.57180   1.36075  -1.48046
O    2.95761   1.98561   0.22066
C    3.02644  -1.53497  -0.01555
C    0.07194  -1.34964   2.24745
C   -0.40730   2.22097   1.31168
C    2.51641   2.02013  -0.95825
C   -1.30335   0.56759  -2.79420
C   -2.00548  -0.30415  -1.83770
H   -0.92389   1.54680  -2.50626
H   -1.60458   0.48314  -3.84327
C   -0.70755  -0.67583  -2.06058
O   -3.13250  -0.65969  -1.35297
Si  -4.70888   0.15980  -1.48280
C   -5.32890  -0.29962  -3.19034
H   -6.34612   0.07857  -3.34631
H   -4.69707   0.14077  -3.97002
H   -5.34859  -1.38349  -3.34320
C   -4.39511   1.99681  -1.31631
H   -5.34802   2.53953  -1.31971
H   -3.87176   2.24665  -0.38906
H   -3.80273   2.38033  -2.15364
C   -5.67490  -0.62217  -0.05363
C   -5.79485  -2.15010  -0.26385
C   -4.95758  -0.34538   1.28862
C   -7.09136   0.00309  -0.01836
H   -6.33829  -2.39999  -1.18240
H   -4.81427  -2.63674  -0.30529
H   -6.34819  -2.59727   0.57275
H   -4.86673   0.72665   1.49725
H   -5.53082  -0.78951   2.11338
H   -3.95398  -0.78284   1.31519
H   -7.67359  -0.44335   0.79852
H   -7.06474   1.08474   0.15925
H   -7.64967  -0.17470  -0.94556
C   -0.18725  -1.92474  -2.67869
O    0.35312  -1.95452  -3.76883
O   -0.41593  -2.99604  -1.89965
C    0.10234  -4.25291  -2.39645
H    1.18606  -4.19075  -2.51418
H   -0.16042  -4.99076  -1.63846
H   -0.35987  -4.50273  -3.35468
C   -1.42523   3.33867   1.67617
F   -2.63678   2.79575   1.93238
F   -1.04276   4.03726   2.74978
F   -1.56416   4.19077   0.63884
C    3.21844   3.00519  -1.93606
F    3.81416   2.31889  -2.93127
F    2.31016   3.83851  -2.48499
F    4.14782   3.74513  -1.31707
C    4.05188  -2.61617  -0.46121
F    3.42667  -3.76108  -0.79639
F    4.72746  -2.17384  -1.54285
F    4.93730  -2.88819   0.50730
C   -0.66993  -2.35839   3.17009
F   -0.50208  -3.61442   2.70771
F   -0.21899  -2.30934   4.43026
F   -1.99244  -2.08992   3.18303
102
COM2-3 Rh2Si2C30N2H40O14F12
Rh  -1.47673   0.84857  -0.14031
Rh   0.90772   0.52761   0.47665
O   -0.79615   2.09779  -1.66716
O    1.39122   1.82294  -1.08842
O   -1.28716  -0.80925  -1.39190
O    0.90966  -1.09755  -0.84386
O   -1.96595  -0.42423   1.46035
O    0.22364  -0.71756   2.02051
O   -1.49153   2.46729   1.18555
O    0.69917   2.17533   1.74861
C    0.44621   2.29389  -1.77393
C   -0.15935  -1.37646  -1.44719
C   -1.01618  -0.89278   2.14823
C   -0.42435   2.74335   1.80152
C   -4.54397   1.47377   0.53374
C   -4.44171   0.26419  -0.30427
H   -4.02108   1.56000   1.48514
H   -5.48549   2.03000   0.47775
C   -3.67555   1.29667  -0.75004
O   -4.95338  -0.87584  -0.59290
Si  -6.15258  -1.80633   0.32341
C   -7.79363  -1.00902  -0.10687
H   -8.62490  -1.56171   0.34653
H   -7.84206   0.01783   0.27317
H   -7.96369  -0.97672  -1.18796
C   -5.74093  -1.62490   2.14041
H   -6.41297  -2.24995   2.74061
H   -4.71397  -1.92670   2.36507
H   -5.87183  -0.59198   2.47956
C   -5.92015  -3.55202  -0.37603
C   -6.19783  -3.55778  -1.89785
C   -4.47474  -4.03933  -0.11925
C   -6.91702  -4.50411   0.32955
H   -7.22692  -3.26135  -2.13174
H   -5.51982  -2.89028  -2.44068
H   -6.05266  -4.57027  -2.29799
H   -4.23374  -4.07724   0.94918
H   -4.34951  -5.05531  -0.51733
H   -3.73365  -3.40103  -0.61197
H   -6.80434  -5.52138  -0.06828
H   -6.74478  -4.56060   1.41100
H   -7.96102  -4.20932   0.16780
C   -3.73068   2.06101  -2.01955
O   -4.05602   3.23297  -2.08226
O   -3.40879   1.29307  -3.07682
C   -3.38646   1.96762  -4.35604
H   -2.66032   2.78310  -4.33826
H   -3.09026   1.20571  -5.07711
H   -4.37701   2.36182  -4.59673
C   -1.46606  -1.80636   3.32376
F   -2.23760  -2.81464   2.86123
F   -0.42437  -2.34033   3.97286
F   -2.19797  -1.09381   4.20518
C   -0.53574   3.96936   2.75244
F   -0.77396   5.08605   2.03500
F   -1.55868   3.79766   3.61466
F    0.58553   4.15568   3.46231
C    0.83750   3.26953  -2.92047
F    0.35721   2.82102  -4.09830
F    0.30783   4.48758  -2.68811
F    2.16674   3.40405  -3.03236
C   -0.11191  -2.59531  -2.41256
F   -0.32821  -2.18900  -3.68021
F    1.07009  -3.22579  -2.36833
F   -1.07489  -3.48380  -2.08754
C    3.20073  -2.23717   1.73845
C    3.99379  -1.26752   1.25291
H    3.55007  -3.26186   1.80627
H    2.19778  -2.01648   2.08275
C    3.60089   0.18174   1.30870
O    5.25939  -1.45640   0.79140
Si   5.84893  -2.53001  -0.40050
C    4.86732  -2.29265  -1.98173
H    5.20494  -2.98759  -2.76028
H    3.80290  -2.48612  -1.80684
H    4.95513  -1.27007  -2.35970
C    5.66097  -4.30909   0.20239
H    6.23694  -4.99638  -0.42921
H    6.00962  -4.43618   1.23337
H    4.61570  -4.63493   0.15638
C    7.68691  -2.04637  -0.55602
C    7.82120  -0.56605  -0.97913
C    8.40211  -2.25126   0.79961
C    8.36223  -2.93778  -1.62547
H    7.35816  -0.37247  -1.95312
H    7.35345   0.10758  -0.25439
H    8.88322  -0.29226  -1.05825
H    8.37178  -3.29694   1.12838
H    9.46084  -1.96676   0.71684
H    7.95581  -1.63735   1.58989
H    9.42213  -2.66589  -1.72834
H    8.32695  -4.00226  -1.36417
H    7.90114  -2.81886  -2.61336
C    4.11268   1.18537   0.34233
O    4.50061   0.90644  -0.77536
O    4.08126   2.43707   0.85600
C    4.48893   3.49161  -0.04595
H    3.87053   3.47792  -0.94496
H    4.34387   4.41716   0.51156
H    5.54006   3.36915  -0.31895
N    3.32831   0.64184   2.53736
N    3.04901   1.01462   3.57045
87
TS4-3-S Rh2SiC31N3H27O11F12
Rh  -1.09212  -0.25568   0.03194
Rh  -3.44236   0.38917   0.61572
O   -1.93956  -1.86184  -1.00339
O   -4.08228  -1.27264  -0.48238
O   -1.30416   0.93528  -1.66791
O   -3.44114   1.53944  -1.13869
O   -0.47844   1.40846   1.14696
O   -2.62049   2.00239   1.66745
O   -1.09389  -1.40072   1.78257
O   -3.23753  -0.82519   2.31461
C   -3.19953  -1.98808  -1.01760
C   -2.40540   1.53586  -1.84872
C   -1.37261   2.12705   1.69106
C   -2.14552  -1.41671   2.49286
C    1.93196  -0.78773   1.65128
C    1.91717  -1.20275   0.34063
H    2.78407  -0.99505   2.29055
H    1.08802  -0.25729   2.07155
C    0.81854  -0.86423  -0.50087
O    2.98236  -1.85244  -0.21782
Si   3.46970  -3.48151   0.06993
C    1.95375  -4.56953  -0.16356
H    2.20456  -5.62364   0.00455
H    1.16933  -4.31044   0.55760
H    1.52139  -4.47918  -1.16508
C    4.09773  -3.62655   1.83494
H    4.53764  -4.61664   2.00626
H    4.85980  -2.87359   2.06156
H    3.28222  -3.51680   2.56004
C    4.82895  -3.79087  -1.22615
C    4.28365  -3.53957  -2.65027
C    6.03532  -2.85793  -0.97404
C    5.29564  -5.26301  -1.11696
H    3.43850  -4.19549  -2.89081
H    3.95718  -2.50181  -2.77996
H    5.06872  -3.73438  -3.39423
H    6.48259  -3.01426   0.01320
H    6.81695  -3.04416  -1.72397
H    5.75581  -1.80112  -1.04228
H    6.08663  -5.46078  -1.85333
H    5.71115  -5.49451  -0.12912
H    4.48367  -5.97257  -1.31599
C    1.06033  -0.98434  -1.96549
O    1.59397  -0.05573  -2.55136
O    0.60575  -2.10640  -2.51747
C    0.70564  -2.19506  -3.96470
H    1.75347  -2.18145  -4.27129
H    0.23886  -3.14462  -4.22302
H    0.17017  -1.36220  -4.42480
C    1.81950   6.14518  -1.55745
C    2.16194   5.50713  -0.38374
C    2.78267   4.22658  -0.43220
C    3.04817   3.61747  -1.69846
C    2.67919   4.29406  -2.88649
C    2.07606   5.53582  -2.81485
H    2.97539   3.98221   1.72383
H    1.34408   7.12246  -1.52401
H    1.96155   5.97006   0.57962
C    3.15015   3.54895   0.74517
C    3.67301   2.34080  -1.68144
H    2.87192   3.82496  -3.84862
H    1.79113   6.05440  -3.72709
C    4.00148   1.73195  -0.50725
H    3.87950   1.81437  -2.60818
H    4.45731   0.75127  -0.46075
N    3.74254   2.33915   0.71740
C    4.08634   1.65123   1.91716
C    3.70125   2.19797   3.15524
N    3.36640   2.65319   4.18298
C    5.02882   0.60748   1.88082
N    5.79053  -0.28502   1.87205
C   -2.44461   2.38621  -3.15110
F   -2.20566   1.60237  -4.22327
F   -3.63206   2.98155  -3.32171
F   -1.49326   3.34142  -3.10974
C   -0.80921   3.32867   2.50181
F   -1.78356   4.04789   3.06967
F    0.01838   2.88857   3.46734
F   -0.10371   4.14441   1.68442
C   -2.02934  -2.31454   3.75797
F   -1.83219  -3.59842   3.39233
F   -0.97621  -1.92599   4.50638
F   -3.13098  -2.25463   4.51479
C   -3.69203  -3.22227  -1.82695
F   -3.26691  -3.13621  -3.10558
F   -3.19088  -4.35512  -1.29462
F   -5.02774  -3.31331  -1.83349
87
M3-3-S Rh2SiC31N3H27O11F12
Rh  -1.07390  -0.21350  -0.03472
Rh  -3.56050   0.01019   0.36431
O   -1.55291  -1.90175  -1.16460
O   -3.80571  -1.67560  -0.85033
O   -1.33836   1.03064  -1.69741
O   -3.58827   1.23708  -1.34992
O   -0.84796   1.49814   1.18959
O   -3.09317   1.69050   1.55188
O   -1.02932  -1.43117   1.67380
O   -3.27912  -1.24558   2.03019
C   -2.76708  -2.21966  -1.30713
C   -2.50632   1.44955  -1.95048
C   -1.89509   2.02578   1.68344
C   -2.11971  -1.65684   2.27935
C    1.85627  -0.40829   1.92159
C    1.98322  -0.70909   0.45218
H    2.05010  -1.27502   2.56094
H    0.86286  -0.03851   2.16202
C    1.01427  -0.46320  -0.44968
O    3.27547  -1.08382   0.11083
Si   3.84971  -2.68134  -0.15366
C    2.49386  -3.73910  -0.90692
H    2.87540  -4.75158  -1.08873
H    1.64509  -3.83218  -0.21989
H    2.10255  -3.34685  -1.84891
C    4.32844  -3.43888   1.50417
H    4.65077  -4.47793   1.36387
H    5.13641  -2.90208   2.01005
H    3.46992  -3.46663   2.18641
C    5.36006  -2.46126  -1.29713
C    4.90617  -1.96537  -2.68906
C    6.34441  -1.43342  -0.69475
C    6.08229  -3.82089  -1.45296
H    4.24781  -2.68863  -3.18468
H    4.37467  -1.00946  -2.62966
H    5.77890  -1.82120  -3.34207
H    6.70342  -1.73232   0.29719
H    7.22610  -1.32812  -1.34291
H    5.88149  -0.44446  -0.60465
H    6.94124  -3.71620  -2.13043
H    6.46670  -4.19751  -0.49795
H    5.42839  -4.59133  -1.87938
C    1.36342  -0.35336  -1.89261
O    2.03699   0.56963  -2.33718
O    0.81349  -1.30119  -2.67682
C    0.99788  -1.12904  -4.09857
H    2.05912  -1.16570  -4.35781
H    0.46087  -1.95793  -4.56079
H    0.57861  -0.17263  -4.42056
C    1.43641   4.72249  -2.02022
C    1.22657   3.82625  -0.99542
C    2.34330   3.21052  -0.36578
C    3.67327   3.51458  -0.79938
C    3.85711   4.44142  -1.85129
C    2.75572   5.03092  -2.44548
H    1.17088   2.05855   1.05183
H    0.59028   5.19133  -2.51529
H    0.22234   3.57015  -0.67236
C    2.16224   2.28802   0.67721
C    4.74622   2.85656  -0.13735
H    4.86317   4.67907  -2.18856
H    2.89833   5.74014  -3.25764
C    4.50600   1.96519   0.86689
H    5.77634   3.04800  -0.42473
H    5.29896   1.44297   1.38475
N    3.21102   1.69551   1.27155
C    2.92236   0.69773   2.36584
C    2.38716   1.43345   3.53557
N    1.94560   1.99731   4.44971
C    4.17330   0.04872   2.80793
N    5.12600  -0.46280   3.23000
C   -2.57235   2.39616  -3.18291
F   -1.95679   1.84634  -4.24732
F   -3.83172   2.68960  -3.52963
F   -1.93668   3.55999  -2.89202
C   -1.63982   3.24604   2.61403
F   -2.63790   4.13778   2.53999
F   -1.53722   2.82506   3.89134
F   -0.48983   3.87767   2.29033
C   -1.96224  -2.59523   3.50976
F   -1.56736  -3.82243   3.10696
F   -1.01940  -2.11174   4.34914
F   -3.10483  -2.72546   4.19535
C   -2.98095  -3.47161  -2.20554
F   -2.59271  -3.19960  -3.47210
F   -2.24534  -4.50884  -1.75859
F   -4.26627  -3.85284  -2.23800
87
TS5-3-S Rh2SiC31N3H27O11F12
Rh  -1.04017  -0.10509  -0.00067
Rh  -3.48032  -0.63318   0.00845
O   -0.77957  -1.98177  -0.90510
O   -3.02142  -2.40185  -0.99020
O   -1.37236   0.83750  -1.83750
O   -3.60458   0.36306  -1.82638
O   -1.58054   1.68679   0.96057
O   -3.80078   1.17707   1.00771
O   -0.94869  -1.05729   1.86759
O   -3.16675  -1.58834   1.84881
C   -1.80397  -2.65918  -1.19231
C   -2.54787   0.85425  -2.30186
C   -2.79858   1.89740   1.23758
C   -2.00905  -1.57116   2.33472
C    2.05875  -0.30104   2.05732
C    2.06086  -0.45976   0.56653
H    2.57229  -1.10777   2.57856
H    1.04469  -0.23520   2.44538
C    1.24125   0.36537  -0.18046
O    3.09434  -1.12074   0.02304
Si   3.74463  -2.71805   0.03284
C    2.44870  -3.83728  -0.72589
H    2.81956  -4.86580  -0.80926
H    1.54741  -3.86362  -0.10440
H    2.14556  -3.49877  -1.72076
C    4.09890  -3.24942   1.80415
H    4.61498  -4.21741   1.80389
H    4.73630  -2.54186   2.34517
H    3.17551  -3.39214   2.37796
C    5.32841  -2.55180  -1.00707
C    4.98339  -2.05916  -2.43125
C    6.30384  -1.54956  -0.34849
C    6.01047  -3.93843  -1.10200
H    4.31043  -2.74819  -2.95477
H    4.51231  -1.07078  -2.41457
H    5.89966  -1.97863  -3.03238
H    6.60598  -1.86204   0.65749
H    7.21830  -1.46432  -0.95180
H    5.86709  -0.54802  -0.27130
H    6.92341  -3.86508  -1.70845
H    6.30724  -4.32468  -0.11970
H    5.36629  -4.68712  -1.57845
C    1.61998   0.48864  -1.63014
O    2.25556   1.42814  -2.08223
O    1.18984  -0.54216  -2.38042
C    1.46927  -0.45076  -3.79452
H    2.54617  -0.39789  -3.97167
H    1.05296  -1.36016  -4.22873
H    0.98586   0.43245  -4.21845
C    4.14617   5.65530  -1.45309
C    4.43523   4.63750  -0.58539
C    3.38111   3.80404  -0.08094
C    2.01263   4.01978  -0.51614
C    1.75832   5.11588  -1.40939
C    2.78882   5.89627  -1.86185
H    4.61108   2.67050   1.28060
H    4.93914   6.29287  -1.83559
H    5.45766   4.45420  -0.26087
C    3.61897   2.83340   0.87249
C    1.02001   3.17809  -0.05041
H    0.73742   5.29917  -1.73658
H    2.58502   6.71288  -2.55107
C    1.31046   2.04615   0.78870
H   -0.01382   3.31753  -0.34736
H    0.53916   1.81483   1.51297
N    2.60325   2.09014   1.39695
C    2.81860   1.07206   2.43669
C    2.26817   1.55291   3.72884
N    1.81576   1.91515   4.73552
C    4.25536   0.78576   2.63798
N    5.36855   0.51464   2.82607
C   -3.06050   3.25694   1.94513
F   -2.78251   4.26965   1.09356
F   -4.33220   3.37823   2.34263
F   -2.26173   3.38684   3.02248
C   -2.68039   1.60668  -3.65658
F   -1.85035   1.06681  -4.57350
F   -3.92836   1.55705  -4.13841
F   -2.33870   2.90332  -3.49629
C   -1.50382  -4.02396  -1.87645
F   -0.61906  -3.87233  -2.88104
F   -0.96959  -4.87522  -0.97175
F   -2.61240  -4.58721  -2.37570
C   -1.81260  -2.28478   3.70225
F   -0.97433  -3.33429   3.55213
F   -1.26038  -1.43656   4.59424
F   -2.96693  -2.73556   4.20482
67
TS1-4 Rh2SiC19N2H32O11
Rh  -1.09533  -0.03498   0.06102
Rh  -3.52788  -0.27435  -0.18530
O   -1.23759   1.61421  -1.21604
O   -3.48509   1.37894  -1.45733
O   -1.49686   1.21672   1.68991
O   -3.74498   0.99737   1.45602
O   -1.15300  -1.68300   1.34788
O   -3.40184  -1.91366   1.10757
O   -0.92608  -1.30889  -1.59118
O   -3.17742  -1.51950  -1.81824
C   -2.37544   1.95423  -1.69006
C   -2.70841   1.45704   2.02728
C   -2.27660  -2.24583   1.59479
C   -1.97778  -1.75260  -2.16824
C    1.71674  -2.17521  -0.05049
C    2.09340  -0.90607   0.18134
H    2.44629  -2.97411  -0.14758
H    0.67071  -2.41716  -0.17141
C    1.09687   0.19387   0.22098
O    3.38107  -0.49111   0.39608
Si   4.86275  -1.00483  -0.28069
C    4.65583  -1.11884  -2.14440
H    5.59513  -1.41462  -2.62649
H    3.90150  -1.86715  -2.41213
H    4.33176  -0.16521  -2.57341
C    5.33368  -2.68482   0.43705
H    6.38859  -2.91227   0.24200
H    5.18316  -2.71815   1.52180
H    4.74692  -3.49740  -0.00610
C    6.09177   0.34739   0.26412
C    5.60153   1.73743  -0.20099
C    6.22636   0.34939   1.80466
C    7.47651   0.06487  -0.36589
H    5.49567   1.79553  -1.29041
H    4.63413   1.99327   0.24368
H    6.32149   2.51156   0.10038
H    6.61856  -0.60087   2.18546
H    6.92084   1.13943   2.12376
H    5.26530   0.53768   2.29653
H    8.19857   0.82995  -0.04849
H    7.88322  -0.90681  -0.06061
H    7.44365   0.08596  -1.46161
C    1.54731   1.42788  -0.50650
O    1.87961   1.34830  -1.67505
O    1.45541   2.57181   0.19192
C    1.69269   3.78115  -0.56617
H    0.97256   3.85178  -1.38365
H    1.55519   4.59699   0.14365
H    2.70938   3.78614  -0.96618
N    1.26933   0.68817   1.94392
N    1.07680   0.78685   3.03176
C   -2.38832   3.16588  -2.59836
H   -3.34892   3.25323  -3.10775
H   -2.21962   4.06492  -1.99616
H   -1.57664   3.09430  -3.32679
C   -1.75724  -2.61821  -3.39058
H   -2.67545  -3.14146  -3.66105
H   -1.45019  -1.97846  -4.22463
H   -0.95029  -3.33178  -3.20678
C   -2.25702  -3.39506   2.58071
H   -1.28362  -3.88897   2.57972
H   -2.43970  -2.99702   3.58501
H   -3.05100  -4.10728   2.34800
C   -2.90372   2.35763   3.22851
H   -3.94643   2.66724   3.30965
H   -2.61988   1.81099   4.13394
H   -2.25232   3.23182   3.15102
67 
COM1-4 Rh2SiC19N2H32O11
Rh  -1.15034  -0.01694   0.10996
Rh  -3.51884  -0.33809  -0.31197
O   -1.22053   1.55541  -1.26356
O   -3.43185   1.23495  -1.66753
O   -1.69012   1.30011   1.63481
O   -3.90440   1.00930   1.23017
O   -1.26334  -1.59617   1.47040
O   -3.47824  -1.89681   1.07079
O   -0.79328  -1.35813  -1.44820
O   -3.01140  -1.66005  -1.83345
C   -2.32246   1.83621  -1.84342
C   -2.92756   1.52020   1.86680
C   -2.38304  -2.18691   1.65074
C   -1.77794  -1.86764  -2.08037
C    1.81378  -2.11681   0.31808
C    2.23480  -0.85494   0.45780
H    2.52038  -2.93970   0.26325
H    0.75872  -2.33992   0.24895
C    1.29564   0.32500   0.60357
O    3.54071  -0.46094   0.57138
Si   4.93293  -0.96210  -0.27914
C    4.54022  -1.00236  -2.11471
H    5.41865  -1.30359  -2.69785
H    3.74236  -1.72342  -2.32470
H    4.19730  -0.02777  -2.47518
C    5.45002  -2.67633   0.31766
H    6.47407  -2.91022   0.00242
H    5.41340  -2.75415   1.40997
H    4.80361  -3.45923  -0.09496
C    6.23302   0.35130   0.19276
C    5.72933   1.76274  -0.18524
C    6.50427   0.30306   1.71441
C    7.55117   0.06746  -0.56620
H    5.53409   1.85770  -1.25949
H    4.80543   2.01725   0.34454
H    6.48440   2.51665   0.07976
H    6.90743  -0.66627   2.03052
H    7.24193   1.06905   1.99306
H    5.59494   0.49428   2.29530
H    8.31090   0.81398  -0.29550
H    7.96799  -0.91751  -0.32366
H    7.42127   0.11853  -1.65383
C    1.56586   1.50829  -0.27627
O    2.00974   1.40112  -1.40139
O    1.25439   2.67444   0.32569
C    1.37271   3.85279  -0.50212
H    0.72058   3.76050  -1.37254
H    1.05812   4.68251   0.13133
H    2.40767   3.98743  -0.82602
N    1.12995   0.65278   1.91599
N    0.92893   0.87488   3.00223
C   -3.25077   2.44990   3.01573
H   -4.25924   2.85286   2.90939
H   -3.19675   1.88261   3.95143
H   -2.51639   3.25656   3.06906
C   -2.39436  -3.34999   2.61850
H   -3.38869  -3.47505   3.05108
H   -2.14016  -4.26401   2.07024
H   -1.64779  -3.20325   3.40146
C   -2.30801   3.00213  -2.80816
H   -3.18222   2.97005  -3.46028
H   -2.33019   3.93558  -2.23517
H   -1.38892   2.98972  -3.39875
C   -1.44531  -2.77986  -3.24080
H   -2.28135  -3.44795  -3.45472
H   -1.25504  -2.16271  -4.12575
H   -0.53853  -3.34988  -3.02790
65
M1-4 Rh2SiC19H32O11
Rh   0.96426   0.02766  -0.10887
Rh   3.37792  -0.35041   0.25330
O    0.83592   0.35445   1.94731
O    3.05700   0.00684   2.28205
O    1.42885   2.04560  -0.38069
O    3.65258   1.69831  -0.05656
O    1.33104  -0.36107  -2.13402
O    3.55613  -0.68099  -1.80308
O    0.70171  -2.02505   0.20964
O    2.92337  -2.37134   0.54656
C    1.88237   0.28150   2.68039
C    2.64560   2.43548  -0.28798
C    2.52334  -0.61221  -2.53529
C    1.71892  -2.76105   0.47350
C   -1.63625  -1.54087  -1.73367
C   -2.03442  -0.50085  -0.94294
H   -2.36416  -2.09469  -2.32194
H   -0.58790  -1.79083  -1.82148
C   -1.03950   0.38359  -0.41174
O   -3.35732  -0.17009  -0.80846
Si  -4.50631  -0.92541   0.21167
C   -3.84774  -0.91458   1.97018
H   -4.57303  -1.35775   2.66322
H   -2.92716  -1.50611   2.04235
H   -3.61067   0.09664   2.31447
C   -4.73665  -2.70573  -0.36335
H   -5.50106  -3.21332   0.23737
H   -5.04277  -2.76964  -1.41339
H   -3.80910  -3.27906  -0.24783
C   -6.07484   0.12584  -0.02917
C   -5.79889   1.59168   0.37712
C   -6.51810   0.08799  -1.51010
C   -7.21020  -0.44069   0.85641
H   -5.49542   1.68052   1.42635
H   -5.01014   2.03849  -0.23731
H   -6.70714   2.19661   0.24512
H   -6.77234  -0.92662  -1.83886
H   -7.41358   0.70925  -1.65249
H   -5.73912   0.47347  -2.17724
H   -8.12383   0.15553   0.72511
H   -7.46131  -1.47651   0.59782
H   -6.95654  -0.41223   1.92283
C   -1.54879   1.71277   0.01774
O   -1.89669   1.91202   1.16961
O   -1.54848   2.61587  -0.96907
C   -1.93857   3.96034  -0.59547
H   -1.25900   4.34856   0.16634
H   -1.86460   4.54518  -1.51204
H   -2.96273   3.96725  -0.21529
C    1.68307   0.57111   4.15261
H    1.55295   1.65016   4.28596
H    0.77537   0.08128   4.51251
H    2.55012   0.24205   4.72715
C    1.43172  -4.22372   0.74044
H    1.01088  -4.32230   1.74677
H    0.69060  -4.60088   0.03160
H    2.34957  -4.81033   0.68128
C    2.69701  -0.81642  -4.02524
H    2.73986   0.16487  -4.51013
H    3.62611  -1.35008  -4.23117
H    1.84303  -1.35677  -4.43976
C    2.88159   3.92163  -0.45659
H    2.53576   4.43956   0.44424
H    3.94356   4.12601  -0.59918
H    2.30276   4.30028  -1.30252
65 
TS2-4 Rh2SiC19H32O11
Rh  -1.02112   0.03732  -0.17643
Rh  -3.29396  -0.56252   0.52299
O   -1.73289   1.97345  -0.50417
O   -3.83988   1.41690   0.14114
O   -0.63895   0.49530   1.82915
O   -2.75387  -0.03928   2.46972
O   -0.47984  -1.95518   0.18596
O   -2.58288  -2.50178   0.85498
O   -1.57347  -0.51148  -2.11767
O   -3.68761  -1.04192  -1.47382
C   -2.96332   2.23708  -0.27874
C   -1.56954   0.36696   2.69526
C   -1.36258  -2.77109   0.62700
C   -2.76851  -0.91244  -2.34158
C    1.70122  -0.84826  -1.89317
C    2.14317  -0.16694  -0.76205
H    0.74684  -1.35468  -1.92440
H    2.33290  -0.88571  -2.78292
C    1.00193   0.62124  -0.71500
O    3.36567   0.12180  -0.35420
Si   4.86419  -0.73079  -0.55734
C    5.54968  -0.25387  -2.23984
H    6.56095  -0.65449  -2.37791
H    4.93228  -0.65352  -3.05246
H    5.60058   0.83288  -2.36541
C    4.50624  -2.57230  -0.46129
H    5.44265  -3.14285  -0.46394
H    3.95700  -2.83624   0.44867
H    3.91678  -2.91740  -1.31765
C    5.90873  -0.08151   0.89061
C    6.05059   1.45562   0.79239
C    5.23066  -0.44399   2.23258
C    7.31398  -0.72775   0.83663
H    6.55976   1.76565  -0.12770
H    5.07728   1.95686   0.82640
H    6.64628   1.83128   1.63571
H    5.14293  -1.52798   2.37116
H    5.82681  -0.05707   3.07046
H    4.22793  -0.01042   2.31348
H    7.92681  -0.36141   1.67135
H    7.27366  -1.82032   0.92286
H    7.84966  -0.48197  -0.08812
C    1.21179   2.08766  -0.91121
O    1.27801   2.60842  -2.01069
O    1.28996   2.73443   0.26187
C    1.38964   4.17571   0.17429
H    0.51748   4.57979  -0.34425
H    1.42032   4.52389   1.20680
H    2.30026   4.46395  -0.35663
C   -0.89026  -4.17898   0.92631
H   -0.14114  -4.49429   0.19659
H   -0.42131  -4.18875   1.91635
H   -1.73326  -4.87176   0.93357
C   -3.10588  -1.24143  -3.78081
H   -3.15469  -0.31064  -4.35543
H   -2.31751  -1.85871  -4.21938
H   -4.06702  -1.75338  -3.84346
C   -3.39965   3.66782  -0.51544
H   -3.09219   4.27698   0.34157
H   -2.91130   4.06915  -1.40626
H   -4.48463   3.72530  -0.61481
C   -1.21987   0.75597   4.11692
H   -1.13993   1.84646   4.17725
H   -1.99032   0.41469   4.80965
H   -0.24827   0.33755   4.39146
87
TS4-4-S Rh2SiC31N3H39O11
Rh  -1.54738  -0.50358  -0.11507
Rh  -3.98876  -0.38165   0.23472
O   -1.92831  -2.23283  -1.22432
O   -4.17964  -2.09569  -0.93918
O   -1.83232   0.65541  -1.83001
O   -4.07634   0.79649  -1.49303
O   -1.40199   1.23919   1.04823
O   -3.64543   1.31255   1.40338
O   -1.48348  -1.67598   1.61859
O   -3.73238  -1.57279   1.92843
C   -3.12834  -2.64747  -1.38809
C   -3.01538   1.03207  -2.14690
C   -2.46534   1.74205   1.57020
C   -2.56448  -1.94163   2.25668
C    1.38765  -0.87478   1.75023
C    1.54358  -1.02906   0.40210
H    2.22808  -1.01506   2.42510
H    0.43138  -0.58917   2.16581
C    0.47691  -0.66285  -0.48417
O    2.75055  -1.38896  -0.14233
Si   3.46457  -2.94214  -0.17085
C    2.29855  -4.11135  -1.07079
H    2.71179  -5.12646  -1.10748
H    1.33376  -4.17271  -0.55317
H    2.09596  -3.78722  -2.09634
C    3.71159  -3.54249   1.59665
H    4.21451  -4.51713   1.60709
H    4.31633  -2.85130   2.19384
H    2.75080  -3.67603   2.10781
C    5.10862  -2.65632  -1.08654
C    4.83920  -2.08225  -2.49660
C    5.98723  -1.65879  -0.29662
C    5.86033  -4.00199  -1.22088
H    4.24111  -2.76516  -3.11186
H    4.31601  -1.12102  -2.44827
H    5.78900  -1.91679  -3.02444
H    6.24297  -2.03366   0.70117
H    6.93227  -1.48354  -0.82980
H    5.49168  -0.68942  -0.17470
H    6.81295  -3.85083  -1.74723
H    6.09791  -4.44345  -0.24556
H    5.28808  -4.74136  -1.79417
C    0.90775  -0.34231  -1.86992
O    1.35408   0.76843  -2.11166
O    0.71532  -1.31762  -2.76252
C    1.04695  -0.98705  -4.13432
H    2.10786  -0.74121  -4.22055
H    0.81119  -1.88223  -4.70949
H    0.44310  -0.14157  -4.47072
C    0.39552   4.62832  -2.01513
C    0.41906   3.84350  -0.88161
C    1.60152   3.78302  -0.09182
C    2.76163   4.51192  -0.50111
C    2.70893   5.30554  -1.67257
C    1.54162   5.36718  -2.41117
H    0.79584   2.42147   1.40350
H   -0.50608   4.67779  -2.62086
H   -0.44416   3.25077  -0.59203
C    1.65303   3.00408   1.08069
C    3.92104   4.38321   0.31275
H    3.59150   5.86154  -1.98154
H    1.49965   5.97864  -3.30952
C    3.90730   3.62410   1.44490
H    4.83983   4.90245   0.05282
H    4.76591   3.52579   2.09716
N    2.76238   2.94088   1.84510
C    2.78619   2.20887   3.06655
C    1.57857   1.86924   3.69546
N    0.56545   1.58440   4.21645
C    4.01688   1.90234   3.67056
N    5.04773   1.64429   4.17024
C   -3.15168   1.81369  -3.43730
H   -2.19727   2.25751  -3.72549
H   -3.47252   1.12773  -4.22902
H   -3.91997   2.58276  -3.33004
C   -2.26931   2.95005   2.45922
H   -3.23173   3.30817   2.82720
H   -1.62261   2.67876   3.29886
H   -1.77118   3.74799   1.89942
C   -2.40675  -2.75501   3.52324
H   -1.72226  -3.58965   3.35208
H   -1.96910  -2.11827   4.29956
H   -3.37606  -3.12038   3.86524
C   -3.28841  -3.93374  -2.17113
H   -2.52263  -4.00794  -2.94590
H   -3.16048  -4.77852  -1.48531
H   -4.28736  -3.99005  -2.60728
87  
M3-4-S Rh2SiC31N3H39O11
Rh  -1.55351  -0.33300  -0.06559
Rh  -4.01198  -0.29147   0.29569
O   -1.89018  -1.98597  -1.29292
O   -4.14275  -1.94779  -0.96627
O   -1.87158   0.95998  -1.68632
O   -4.12725   0.97056  -1.37669
O   -1.45604   1.33737   1.23735
O   -3.70523   1.36984   1.54602
O   -1.44885  -1.61681   1.59503
O   -3.70024  -1.57336   1.92336
C   -3.07623  -2.42369  -1.47048
C   -3.06690   1.29652  -1.99494
C   -2.53932   1.81261   1.74788
C   -2.52279  -1.95701   2.20333
C    1.31495  -0.30539   1.98433
C    1.54326  -0.60835   0.53155
H    1.60080  -1.12675   2.64852
H    0.26897  -0.07338   2.16793
C    0.59488  -0.45828  -0.41194
O    2.89075  -0.87085   0.26140
Si   3.63077  -2.40812   0.16800
C    2.39873  -3.68440  -0.44861
H    2.88525  -4.66373  -0.53859
H    1.57263  -3.79438   0.26365
H    1.95678  -3.42290  -1.41301
C    4.20144  -2.94711   1.88428
H    4.63840  -3.95224   1.83418
H    4.94601  -2.27909   2.32717
H    3.35631  -3.00695   2.58089
C    5.11926  -2.14943  -0.99945
C    4.62597  -1.82731  -2.42778
C    5.98965  -0.97571  -0.49496
C    5.97727  -3.43589  -1.03797
H    4.03336  -2.64744  -2.84963
H    4.01208  -0.92054  -2.45042
H    5.48291  -1.66570  -3.09778
H    6.38336  -1.15452   0.51278
H    6.85253  -0.82926  -1.16066
H    5.42344  -0.03774  -0.47624
H    6.82646  -3.30448  -1.72345
H    6.39086  -3.68731  -0.05434
H    5.40725  -4.30285  -1.39393
C    0.98360  -0.41249  -1.83938
O    1.39196   0.60667  -2.38834
O    0.78565  -1.56792  -2.51734
C    0.99204  -1.49941  -3.94145
H    2.02690  -1.23573  -4.17500
H    0.75911  -2.49696  -4.31746
H    0.32285  -0.75872  -4.38743
C    0.57994   4.54889  -2.22236
C    0.40971   3.64073  -1.19895
C    1.53767   3.23170  -0.43752
C    2.83975   3.73566  -0.74623
C    2.98324   4.66261  -1.80401
C    1.86876   5.06165  -2.52133
H    0.40419   1.97467   0.93013
H   -0.27263   4.86763  -2.81651
H   -0.56183   3.20546  -0.98400
C    1.38832   2.32344   0.62655
C    3.93012   3.26899   0.04271
H    3.96876   5.05211  -2.04823
H    1.98081   5.77423  -3.33549
C    3.72666   2.38003   1.05571
H    4.94273   3.61045  -0.15302
H    4.53285   1.99844   1.66779
N    2.45072   1.92984   1.34993
C    2.20049   0.94746   2.46040
C    1.48135   1.65015   3.54894
N    0.89602   2.18621   4.39701
C    3.48021   0.48101   3.02949
N    4.45181   0.11084   3.54618
C   -3.23462   2.15987  -3.23098
H   -2.27250   2.54237  -3.57474
H   -3.68020   1.55333  -4.02649
H   -3.92288   2.98294  -3.02123
C   -2.38418   3.01485   2.65724
H   -3.33834   3.26480   3.12270
H   -1.63423   2.81227   3.42650
H   -2.03499   3.87188   2.07130
C   -2.36077  -2.93156   3.35347
H   -2.23670  -3.94054   2.94532
H   -1.46522  -2.69351   3.93254
H   -3.24324  -2.91848   3.99502
C   -3.21321  -3.61909  -2.39324
H   -3.07603  -3.28705  -3.42790
H   -2.43442  -4.35358  -2.17404
H   -4.20163  -4.07011  -2.29302
87 Rh2SiC31N3H39O11
TS5-4-S Rh2SiC31N3H39O11
Rh  -1.32641  -0.32560   0.00031
Rh  -3.63289  -1.10964   0.31317
O   -1.09607  -1.92058  -1.33270
O   -3.25561  -2.59116  -1.09325
O   -2.07356   0.91308  -1.50808
O   -4.20540   0.17960  -1.21931
O   -1.75204   1.14327   1.44190
O   -3.88151   0.41603   1.72446
O   -0.79949  -1.65805   1.54664
O   -2.93806  -2.37116   1.81994
C   -2.08215  -2.68841  -1.58229
C   -3.31608   0.88295  -1.79821
C   -2.91195   1.18731   1.99129
C   -1.70132  -2.37037   2.10977
C    1.67318  -0.04227   1.87112
C    1.77888  -0.18029   0.37886
H    2.19722  -0.83542   2.40540
H    0.63261  -0.04817   2.18307
C    0.87829   0.46707  -0.41420
O    2.93596  -0.75217  -0.05446
Si   3.28365  -2.38005  -0.46431
C    2.38257  -2.82481  -2.04862
H    2.49092  -3.89601  -2.25993
H    1.31386  -2.60209  -1.96168
H    2.76798  -2.27160  -2.91168
C    2.65914  -3.47034   0.93876
H    2.82294  -4.53067   0.71144
H    3.15265  -3.25734   1.89349
H    1.58051  -3.32802   1.07488
C    5.17742  -2.41003  -0.65872
C    5.61740  -1.36082  -1.70613
C    5.86799  -2.09999   0.68856
C    5.60949  -3.81720  -1.13673
H    5.18836  -1.56056  -2.69508
H    5.32513  -0.34644  -1.41445
H    6.71091  -1.37484  -1.81725
H    5.62451  -2.84355   1.45676
H    6.96010  -2.10952   0.56414
H    5.59158  -1.11381   1.07595
H    6.70170  -3.85794  -1.25099
H    5.33112  -4.60177  -0.42222
H    5.17231  -4.07691  -2.10811
C    1.23840   0.72667  -1.83157
O    2.01798   1.61213  -2.16900
O    0.59167  -0.04702  -2.72719
C    0.85929   0.24506  -4.11052
H    1.92185   0.11995  -4.33760
H    0.26172  -0.46899  -4.67899
H    0.56144   1.26939  -4.35077
C   -0.87174   4.79203  -1.59125
C   -0.63961   3.74324  -0.71345
C    0.66687   3.49092  -0.24463
C    1.74426   4.31200  -0.67509
C    1.48872   5.36537  -1.57816
C    0.19715   5.60256  -2.02840
H    0.07103   2.06244   1.27532
H   -1.88006   4.99001  -1.94720
H   -1.44963   3.09614  -0.39427
C    0.90988   2.41306   0.68810
C    3.05058   4.05591  -0.13544
H    2.31259   5.99216  -1.91283
H    0.00634   6.41936  -2.72114
C    3.21972   3.12169   0.83045
H    3.91215   4.62228  -0.47570
H    4.18304   2.92092   1.28181
N    2.13938   2.39562   1.32336
C    2.31129   1.35311   2.35024
C    1.61717   1.76718   3.59753
N    1.04495   2.07124   4.56173
C    3.73515   1.14411   2.69059
N    4.83225   0.92602   3.00215
C   -3.77455   1.75156  -2.95159
H   -3.02240   2.50360  -3.19477
H   -3.93305   1.11452  -3.82853
H   -4.72927   2.22454  -2.70855
C   -3.12167   2.26177   3.03648
H   -4.10657   2.16356   3.49452
H   -2.34282   2.19131   3.80131
H   -3.03302   3.24715   2.56763
C   -1.24649  -3.27446   3.23677
H   -0.31495  -3.77784   2.96660
H   -1.05000  -2.66354   4.12462
H   -2.01896  -4.00689   3.47567
C   -1.83045  -3.84247  -2.53098
H   -2.73880  -4.07557  -3.09066
H   -1.00789  -3.61096  -3.20975
H   -1.55777  -4.72677  -1.94426
